# Supplementary material for: The contribution of cohesin-SA1 to gene expression and chromatin architecture in two murine tissues
Source: PubMed Central journal article supplement — Nucleic Acids Res. 2015 Mar 3;43(6):3056–67. doi: 10.1093/nar/gkv144 (PMC4381060; doi:10.1093/nar/gkv144), 2015-03-03
Supplement: supp_gkv144_nar-02312-v-2014-File007.pdf [file supp_gkv144_nar-02312-v-2014-File007.pdf]

**SUPPLEMENTARY FIGURE LEGENDS**

**Supplementary Figure 1.** Ubiquitous cohesin positions overlap more extensively with CTCF than tissue-specific cohesin positions. (A) Overlap between cohesin binding sites in cortex and pancreas (Venn diagram in the centre of the figure) and distribution of ubiquitous and tissue-specific positions among intergenic and gene associated regions. The latter include 1 kb upstream the TSS, the gene body and 1 kb downstream the TTS. Unlike Figure 1, here cohesin positions for each tissue correspond to the sum of SMC1 and SA1 peaks. Overlap between CTCF positions in 10 week-old mice cortex (9) (B) and pancreas (C) and cohesin binding sites (defined as in A).

**Supplementary Figure 2.** Cohesin is enriched along the gene body of highly expressed genes. (A) Genomic distribution of SMC1, SA1, the elongating form of RNA pol II, and CTCF obtained by ChIP-seq, along the body of genes highly expressed in adult pancreas. Rabbit IgG binding to chromatin was used as a control to ensure antibody specificity. (B) Genomic distribution of SMC1, SA1 and the elongating form of RNA pol II in three genes highly expressed in adult cortex. Cortex CTCF peaks were obtained from (9). *Eef1a1* is highly expressed not only in cerebral cortex (FPKM = 1,5423) but also in pancreas (FPKM = 12,336). (C) Transcript levels of the most highly expressed genes in pancreas, mostly pancreatic enzymes, are up to two orders of magnitude higher than those of the most highly expressed cerebral genes.

**Supplementary Figure 3.** Cohesin distribution in embryonic brains (E17.5). Venn diagrams showing the overlap between SMC1 and SA1 positions in cerebral cortex from 10 week-old mice and brains from wild-type and SA1 knock out (KO) embryos (E17.5) obtained by ChIP-seq. Two replicates corresponding to independent experiments containing tissue from at least four individuals were performed.

**Supplementary Figure 4.** Chromatin profiling of adult cortex using Hidden Markov Models to combine data of the distribution of the indicated chromatin marks, CTCF [data from (9)], cohesin SMC1 and SA1. The frequency of a given mark in each chromatin state is represented by the blue shading. Out of 15 chromatin states selected, states numbered 3 and 7 could not be assigned to any predefined genomic state and are therefore not shown in Figure 3. Comparison of the frequencies of SMC1 and SA1 hint to the presence of cohesin-SA1 or cohesin-SA2. For example, in state 9 the frequency of SA1 is considerably lower than the frequency of SMC1, suggesting that either cohesin-SA1 or cohesin-SA2 can occur at these promoters. In CTCF-containing states 11 and 12, in contrast, the frequencies of SA1 and SMC1 are identically high. Thus, cohesin-SA1 is necessarily present, and may or may not be accompanied by cohesin-SA2. In state 13, there is SMC1 but no SA1, which suggests that cohesin-SA2 could be predominant.

**Supplementary Figure 5.** Cohesin is present at promoters of actively expressed genes lacking classical active promoter-associated chromatin marks. Image showing cohesin distribution (SA1 and SMC1), CTCF sites and chromatin states (colour-coded according to the legend on the right) and RNA-seq tracks along part of the *Pcdh $\beta$*  gene cluster in adult cortex and pancreas. Note that cohesin-only state (blue) is found at the promoters of many genes of the cluster that are being actively transcribed in cortex.

**Supplementary Figure 6.** Overlap between cortex and pancreas CTCF positions. Cortex specific CTCF sites were defined as those present in cortex but not in pancreas.

**Supplementary Figure 7.** Relationship between gene expression and genomic structure in the murine *Pcdh $\beta$*  locus. (A) Detail of the chromosome 18qB3 region

containing the mouse *Pcdh*  $\alpha$ ,  $\beta$  and  $\gamma$  clusters. HS5-1 and HS16-20 enhancer regions are shown. (B) Top panel: Chromatin interactions detected by 4C-seq in cerebral cortex from 10 week-old mice and from wild-type and SA1 null E17.5 embryos using a 20-kb window size in the main trend subpanel. Red arrowheads indicate the viewpoint positions. Bottom panel: Cohesin SA1 distribution assessed by ChIP-seq in the highlighted regions involving chromatin interaction. The blue arrowhead on the right panel indicates a prominent cohesin position at the promoter of *Pcdhb16* gene in adult cortex that is clearly reduced in the embryo. (C) The amount of cohesin SMC1 bound at the promoters of *Pcdha4* and *Pcdha6* genes was assessed by ChIP-qPCR in the brain of wild-type and SA1 KO E17.5 embryos. Chromatin from at least 4 animals per condition was used for the analysis.

**Supplementary Figure 8.** Differential chromatin architecture of the *Reg* locus in pancreas and cortex. (A) Analysis of the three-dimensional organization of the *Reg* locus in murine cortex and pancreas by 4C-sequencing. A heatmap of the Hi-C interactions previously described in adult mice cortex in this genomic position is shown at the top of the figure (7). Inset shows a magnification of the region containing the *Reg* genes and its correspondence with ChIP-seq and Hi-C data. The green arrowheads indicate the location of the different viewpoints analyzed in this locus (VP1, VP2, VP3). Main trend corresponds to a 20-kb window size. (B) Analysis of the three-dimensional organization of the *Reg* locus in pancreas from wt and SA1 heterozygous mice using VP3 as anchoring point for the 4C analysis. Main trend corresponds to a 5-kb window size. The green arrowhead indicates the location of the viewpoint (VP3).

**Supplementary Table 1.** Summary of the number of quality-filtered reads obtained for each of the ChIP-seq experiments in this study. Two independent replicates (R1 and

R2) per condition containing genomic material from at least three mice were performed. E17.5, embryonic brain. KO, knock out.

**Supplementary Table 2.** (A) Summary of the number of quality-filtered reads obtained for each of the RNA-seq experiments in this study. Two independent replicates (R1 and R2) per condition containing genomic material from at least four mice were performed. E17.5, embryonic brain. KO, knock out. (B) Correlation coefficient between the RNA-seq replicates.

**Supplementary Table 3.** Correlation between the replicates described in Supplementary Table 2.

**Supplementary Table 4.** List of brain specific and pancreas specific genes. A gene is considered "tissue specific" in a given tissue "A" when compared with tissue "B" when FPKM in tissue B  $< 3$ , FDR  $< 0.05$  and  $\log_2FC$  A/B  $> 4$ .

**Supplementary Table 5.** Gene expression changes between wild-type and SA1 null brains from E17.5 embryos analyzed by RNA-seq (FDR  $< 0.05$ ). Two independent RNA-seq experiments with RNA from at least four individuals each were carried out.

**Supplementary Table 6.** Summary of the number of quality-filtered and mapped reads obtained for each of the 4C-seq experiments in the Pcdh locus. Two independent replicates (R1 and R2) per condition containing genomic material from at least three mice were performed. E17.5, embryonic brain; KO, knock out.

**Supplementary Table 7.** Primers used for 4C-seq experiments.

**Supplementary Table 8.** Primers used for qRT-PCR and for ChIP-qPCR analysis.

# Supplementary Figure 1

A

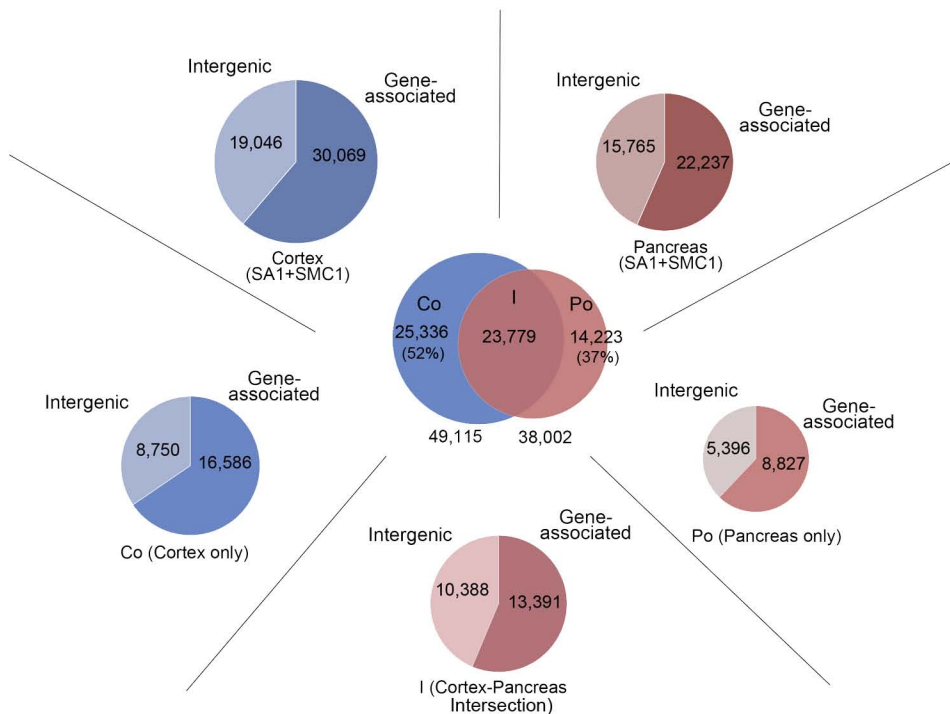

B

● Cortex CTCF: 37,080

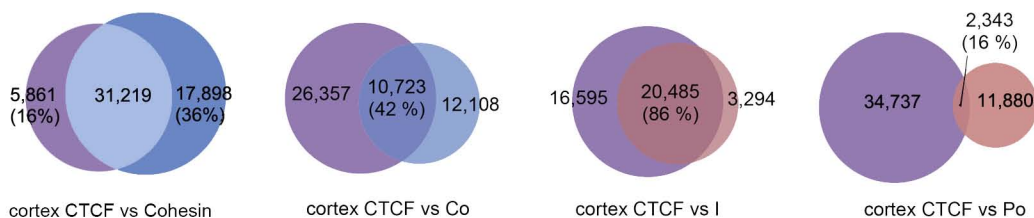

C

● Pancreas CTCF: 17,625

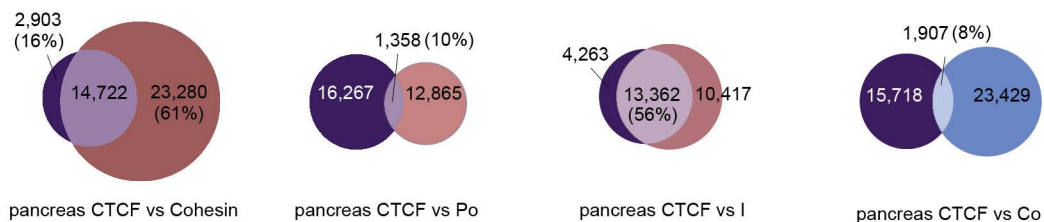

# Supplementary Figure 2

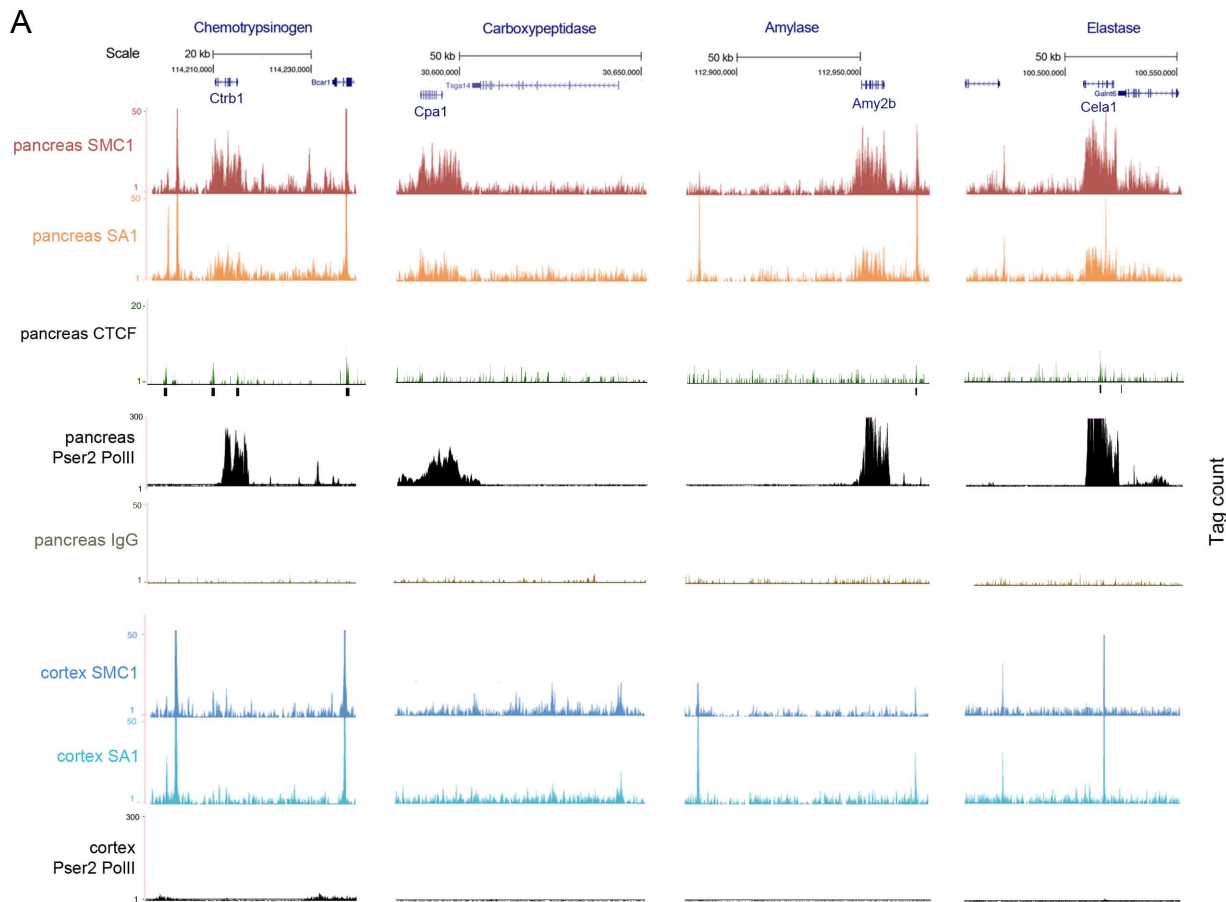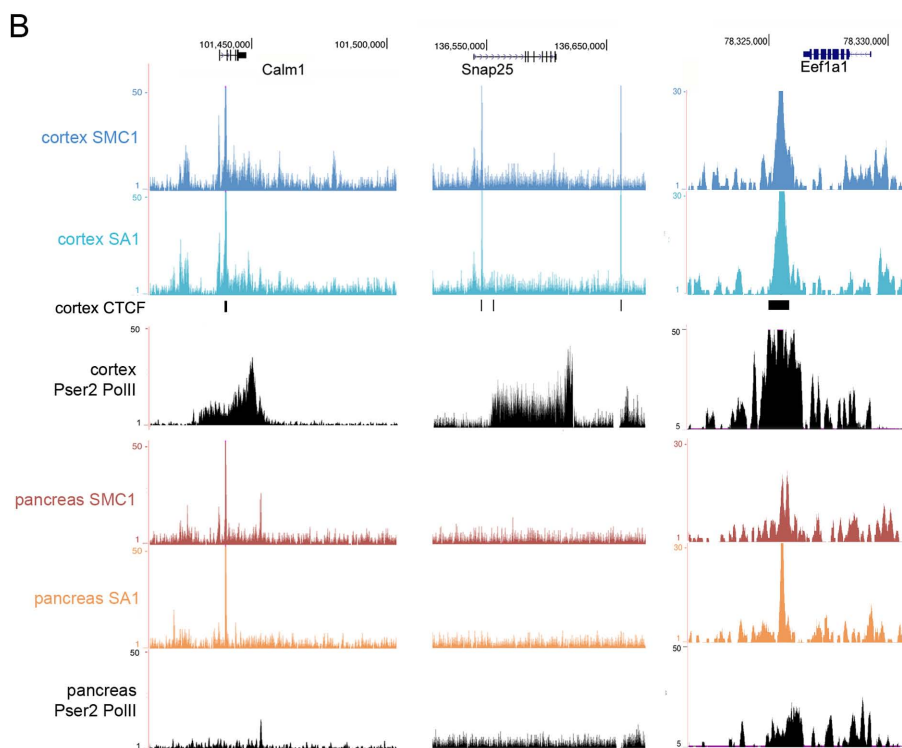

**C**

| cortex |        |
|--------|--------|
| Gene   | FPKM   |
| Rpl13a | 1748.6 |
| Calm3  | 1628.4 |
| Fth1   | 1561.1 |
| Eef1a1 | 1542.8 |
| Cst3   | 1427.3 |
| Calm2  | 1426.2 |
| Snap25 | 1360.8 |
| Atp5b  | 1222.7 |
| Calm1  | 1212.3 |
| Ubb    | 1202.6 |
| Hspa8  | 1187.0 |
| Apoe   | 1158.8 |

  

| pancreas |        |
|----------|--------|
| Gene     | FPKM   |
| Clps     | 255407 |
| Ctr1     | 154296 |
| Cela     | 152223 |
| Rnase1   | 136971 |
| Reg1     | 129652 |
| Zg16     | 126988 |
| Cpa      | 107110 |
| Sycn     | 64493  |
| Reg2     | 50193  |
| Amy2     | 41965  |
| Ctrc     | 40087  |
| Try10    | 34327  |

Tag count

# Supplementary Figure 3

● Cortex SMC1: 46,398  
● Cortex SA1: 35,048

● Wt E. Brain SMC1: 21,030  
● Wt E. Brain SA1: 24,141

● SA1 KO E. Brain SMC1: 12,367

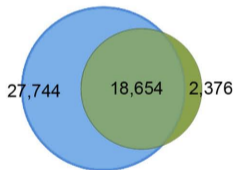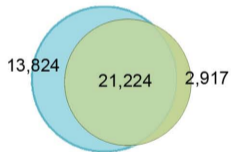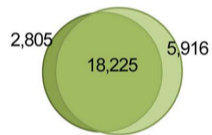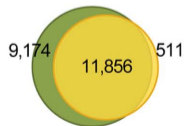





# Supplementary Figure 5

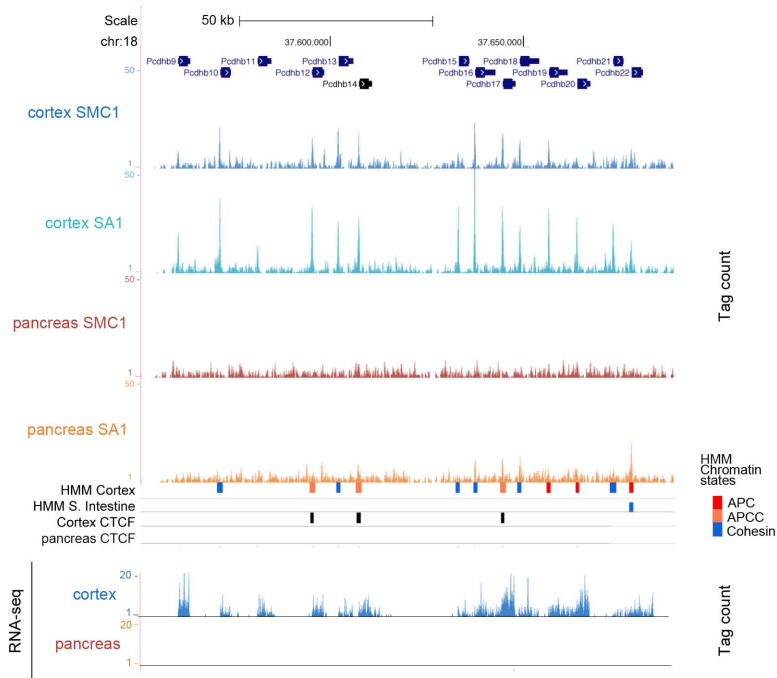

## Supplementary Figure 6

- Cortex CTCF: 37,080
- Pancreas CTCF: 17,625

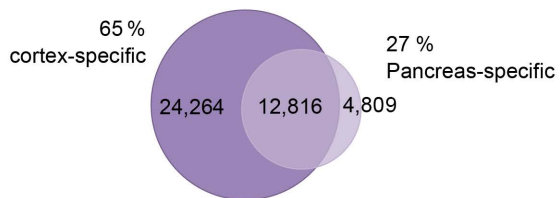

# Supplementary Figure 7

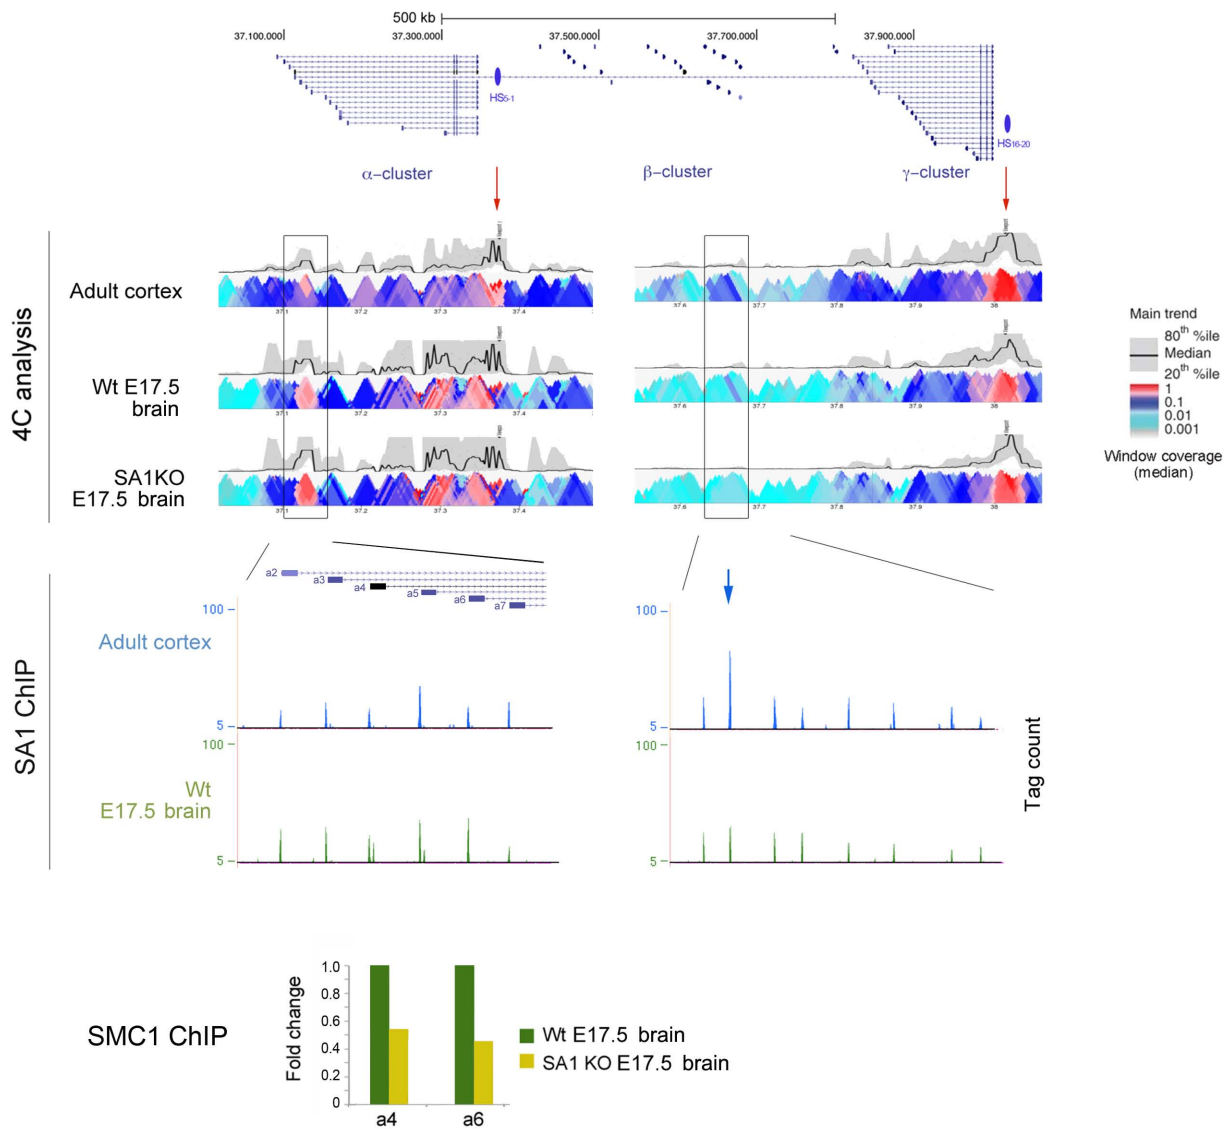

# Supplementary Figure 8

A

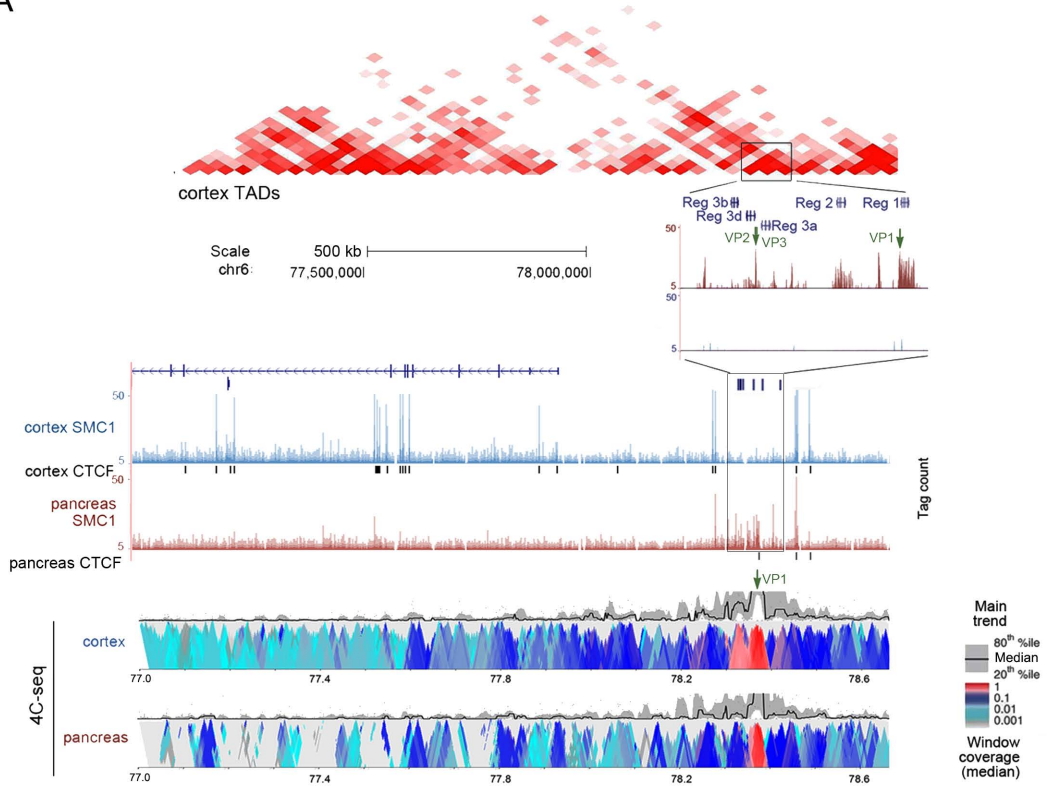

B

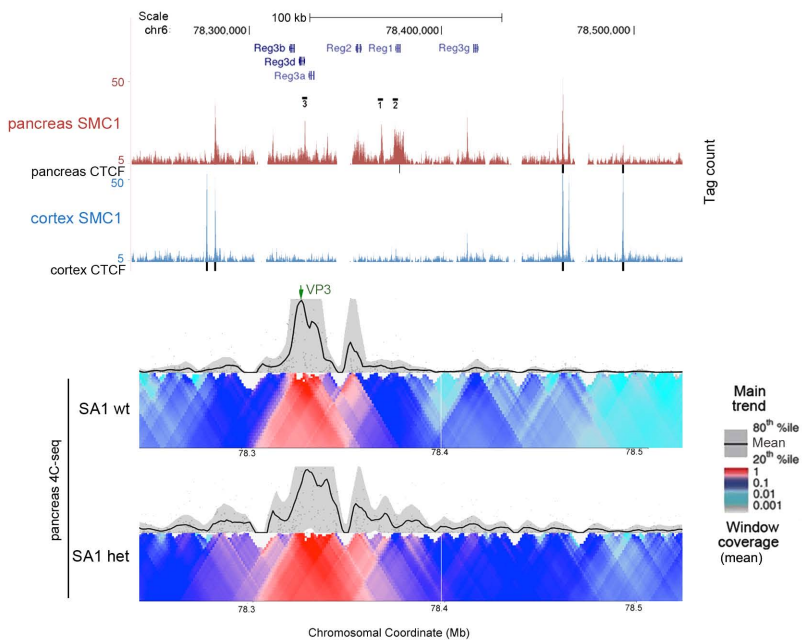

## Supplementary Table 1

| Sample                   | number of high quality reads | number of reads mapped confidently | % $\geq$ Q30 bases |
|--------------------------|------------------------------|------------------------------------|--------------------|
| Adult cortex SA1-R1      | 33,818,956                   | 20,541,633                         | 91.8               |
| Adult cortex SA1-R2      | 24,682,590                   | 14,582,474                         | 93.46              |
| Adult cortex SMC1-R1     | 25,537,112                   | 17,030,699                         | 91.79              |
| Adult cortex SMC1-R2     | 26,536,313                   | 17,118,575                         | 90.55              |
| Pancreas SA1-R1          | 28,794,370                   | 17,665,345                         | 92.68              |
| Pancreas SA1-R2          | 29,516,813                   | 15,602,587                         | 92.31              |
| Pancreas SMC1-R1         | 28,749,095                   | 17,097,086                         | 92.59              |
| Pancreas SMC1-R2         | 26,563,391                   | 17,162,606                         | 93.35              |
| Adult cortex RNAPoIII-R1 | 30,695,965                   | 19,854,150                         | 93.31              |
| Adult cortex RNAPoIII-R2 | 32,447,541                   | 20,257,000                         | 90.99              |
| Pancreas RNAPoIII-R1     | 28,749,095                   | 17,097,593                         | 92.59              |
| Pancreas RNAPoIII-R2     | 28,589,102                   | 17,893,919                         | 93.59              |
| Wt E17.5 brain SA1-R1    | 29,971,657                   | 22,751,484                         | 93.49              |
| Wt E17.5 brain SA1-R2    | 29,049,790                   | 22,153,369                         | 93.73              |
| Wt E17.5 brain SMC1-R1   | 28,114,678                   | 20,844,222                         | 93.32              |
| Wt E17.5 brain SMC1-R2   | 30,203,540                   | 22,749,306                         | 93.44              |
| KO E17.5 brain SMC1-R1   | 28,867,492                   | 21,168,531                         | 93.48              |
| KO E17.5 brain SMC1-R2   | 29,489,828                   | 21,760,544                         | 93.62              |
| Input                    | 51,199,644                   | 38,671,091                         | 89.48              |

## Supplementary Table 2

| Sample            | number of high quality reads | number of reads mapped confidently | % >=Q30 |
|-------------------|------------------------------|------------------------------------|---------|
| Adult cortex-R1   | 27,436,953                   | 20,286,883                         | 89.28   |
| Adult cortex-R2   | 29,471,209                   | 21,938,367                         | 89.43   |
| Adult pancreas-R1 | 30,199,492                   | 14,368,918                         | 90.93   |
| Adult pancreas-R2 | 26,662,277                   | 12,539,268                         | 91.2    |
| WT E17.5 brain-R1 | 25,526,019                   | 20,060,898                         | 93.82   |
| WT E17.5 brain-R2 | 21,367,106                   | 16,826,595                         | 93.67   |
| KO E17.5 brain-R1 | 26,830,768                   | 20,995,075                         | 94.22   |
| KO E17.5 brain-R2 | 24,153,837                   | 18,571,885                         | 94.05   |

## Supplementary Table 3

|                |    | Adult cortex |      | Adult pancreas |      |
|----------------|----|--------------|------|----------------|------|
|                |    | R1           | R2   | R1             | R2   |
| Adult cortex   | R1 | 1.00         | 1.00 | 0.06           | 0.05 |
|                | R2 |              | 1.00 | 0.07           | 0.06 |
| Adult pancreas | R1 |              |      | 1.00           | 0.87 |
|                | R2 |              |      |                | 1.00 |

  

|                |    | WT E17.5 brain |      | KO E17.5 brain |      |
|----------------|----|----------------|------|----------------|------|
|                |    | R1             | R2   | R1             | R2   |
| WT E17.5 brain | R1 | 1.00           | 1.00 | 0.99           | 0.99 |
|                | R2 |                | 1.00 | 0.99           | 0.98 |
| KO E17.5 brain | R1 |                |      | 1.00           | 0.99 |
|                | R2 |                |      |                | 1.00 |

## Supplementary Table 4

Cortex specific genes

| gene                 | Cortex (FPKM) | Pancreas (FPKM) | log2 (fold change) | FDR         |
|----------------------|---------------|-----------------|--------------------|-------------|
| <b>Snap25</b>        | 1360.81       | 0.628987        | 11.0791            | 0           |
| <b>Nrgn</b>          | 702.245       | 0               | 1.7977E+308        | 1.19908E-40 |
| <b>Gm17364</b>       | 664.469       | 0               | 1.7977E+308        | 5.14533E-08 |
| <b>Prkar1b</b>       | 606.725       | 1.79535         | 8.40064            | 4.06398E-09 |
| <b>Stmn3</b>         | 530.815       | 0.40822         | 10.3446            | 3.2849E-09  |
| <b>Ckb</b>           | 468.244       | 1.56519         | 8.22478            | 0           |
| <b>Ndr4</b>          | 467.652       | 0.68778         | 9.40927            | 2.70247E-11 |
| <b>Zfp365</b>        | 462.538       | 2.03384         | 7.82922            | 0.00192371  |
| <b>Camk2a</b>        | 454.391       | 0.107039        | 12.0516            | 7.7393E-09  |
| <b>Dlg4</b>          | 454.052       | 1.50448         | 8.23745            | 0.00140349  |
| <b>Cck</b>           | 452.888       | 0               | 1.7977E+308        | 0           |
| <b>Olfm1</b>         | 451.792       | 0.687617        | 9.35984            | 0           |
| <b>Gpm6a</b>         | 443.704       | 2.66039         | 7.38182            | 0           |
| <b>Trbj2-3</b>       | 396.531       | 0               | 1.7977E+308        | 0.0129113   |
| <b>Mt3</b>           | 390.413       | 1.6077          | 7.92386            | 3.15892E-10 |
| <b>Pcp4</b>          | 366.161       | 0.372935        | 9.93934            | 0.00108261  |
| <b>Nrsn1</b>         | 360.089       | 0.15737         | 11.16              | 1.23807E-06 |
| <b>Gnao1</b>         | 352.926       | 1.88588         | 7.54799            | 0           |
| <b>Sncb</b>          | 348.013       | 0               | 1.7977E+308        | 0           |
| <b>Hpca</b>          | 347.777       | 1.71895         | 7.66049            | 8.03765E-14 |
| <b>Eef1a2</b>        | 341           | 0.168002        | 10.9871            | 1.98022E-06 |
| <b>Cplx1</b>         | 328.164       | 0               | 1.7977E+308        | 0           |
| <b>Slc1a2</b>        | 325.485       | 2.47746         | 7.03759            | 4.05076E-12 |
| <b>Gabbr1</b>        | 324.789       | 2.25347         | 7.17121            | 8.27455E-05 |
| <b>Atp1a3</b>        | 323.064       | 0.193925        | 10.7021            | 1.52923E-11 |
| <b>Vsn1</b>          | 317.396       | 0.153468        | 11.0141            | 2.77654E-10 |
| <b>Uchl1</b>         | 315.995       | 1.00758         | 8.29286            | 0           |
| <b>Mobp</b>          | 313.819       | 0.110463        | 11.4721            | 4.33543E-11 |
| <b>Plp1</b>          | 313.795       | 0.505225        | 9.27868            | 1.13102E-10 |
| <b>2610017109Rik</b> | 307.444       | 0               | 1.7977E+308        | 4.98962E-45 |
| <b>6330527006Rik</b> | 307.073       | 0               | 1.7977E+308        | 0           |
| <b>Rgs4</b>          | 304.31        | 1.88926         | 7.33158            | 0           |
| <b>CT030685.2</b>    | 293.353       | 0               | 1.7977E+308        | 0.00130439  |
| <b>Slc17a7</b>       | 277.848       | 0.118959        | 11.1896            | 9.47E-08    |
| <b>Dnm1</b>          | 275.614       | 2.18356         | 6.97983            | 0           |
| <b>Syt1</b>          | 270.631       | 0.14428         | 10.8732            | 3.05764E-14 |
| <b>Rapgef4</b>       | 268.828       | 1.74695         | 7.2657             | 6.52401E-08 |
| <b>Pfn2</b>          | 265.276       | 1.96325         | 7.07811            | 0           |
| <b>Atp6v1g2</b>      | 265.09        | 1.85164         | 7.16153            | 8.2766E-10  |
| <b>Kif5a</b>         | 263.761       | 0.180432        | 10.5136            | 0           |

|                      |         |           |             |             |
|----------------------|---------|-----------|-------------|-------------|
| <b>Kcnab2</b>        | 219.374 | 1.59806   | 7.10092     | 0.000165957 |
| <b>Ncald</b>         | 216.776 | 2.91992   | 6.21413     | 0           |
| <b>SNORD91</b>       | 214.014 | 0         | 1.7977E+308 | 1.96837E-05 |
| <b>Fez1</b>          | 201.519 | 2.06917   | 6.60572     | 3.24186E-08 |
| <b>Gabra1</b>        | 199.582 | 0.0592909 | 11.7169     | 1.61429E-11 |
| <b>Stmn2</b>         | 198.238 | 1.66625   | 6.89449     | 0           |
| <b>Mapk10</b>        | 195.377 | 1.06715   | 7.51636     | 0.0284786   |
| <b>Tagln3</b>        | 183.793 | 0         | 1.7977E+308 | 0           |
| <b>Cx3cl1</b>        | 178.788 | 0.560274  | 8.3179      | 0           |
| <b>Arpp21</b>        | 178.253 | 1.23149   | 7.17737     | 0           |
| <b>Ctxn1</b>         | 177.991 | 0.318227  | 9.12754     | 1.69949E-05 |
| <b>Nsg2</b>          | 173.781 | 0         | 1.7977E+308 | 0           |
| <b>Tubb4</b>         | 171.591 | 0.743438  | 7.85055     | 0           |
| <b>Syt11</b>         | 169.922 | 1.09732   | 7.27474     | 0           |
| <b>Gm13706</b>       | 169.166 | 0         | 1.7977E+308 | 0           |
| <b>Pak1</b>          | 168.656 | 1.30798   | 7.0106      | 0           |
| <b>Phyhip</b>        | 166.707 | 0.288818  | 9.17294     | 0           |
| <b>Ptn</b>           | 165.985 | 1.96683   | 6.39904     | 4.45519E-13 |
| <b>AC084162.1</b>    | 165.716 | 0         | 1.7977E+308 | 0.00221511  |
| <b>Sult4a1</b>       | 162.734 | 0         | 1.7977E+308 | 0           |
| <b>Prkcb</b>         | 160.553 | 2.83316   | 5.82449     | 3.73464E-05 |
| <b>Cplx2</b>         | 159.145 | 1.55257   | 6.67954     | 0           |
| <b>Stxbp1</b>        | 157.822 | 1.73586   | 6.5065      | 0           |
| <b>Psd</b>           | 155.777 | 0.570177  | 8.09385     | 0           |
| <b>Npy</b>           | 152.847 | 0.727366  | 7.71519     | 1.45196E-05 |
| <b>Basp1</b>         | 149.961 | 0.699149  | 7.74477     | 0           |
| <b>Hpcal4</b>        | 149.108 | 0         | 1.7977E+308 | 0           |
| <b>Nrn1</b>          | 148.617 | 0.620687  | 7.90352     | 1.04485E-12 |
| <b>Clstn3</b>        | 148.581 | 0.779597  | 7.5743      | 0.0015131   |
| <b>SNORD113</b>      | 146.484 | 0         | 1.7977E+308 | 0.00879496  |
| <b>Gm12892</b>       | 145.115 | 0.805491  | 7.49311     | 1.02333E-11 |
| <b>Atp6v0e2</b>      | 144.415 | 2.09012   | 6.11049     | 0           |
| <b>Enc1</b>          | 144.263 | 2.47234   | 5.86668     | 0           |
| <b>2900011O08Rik</b> | 143.932 | 0.254519  | 9.1434      | 0.000401154 |
| <b>Dos</b>           | 143.707 | 1.32446   | 6.76158     | 1.26207E-05 |
| <b>Milt11</b>        | 142.372 | 1.45804   | 6.60949     | 0           |
| <b>6330403K07Rik</b> | 139.856 | 0.342444  | 8.67386     | 4.49922E-08 |
| <b>Nap1l5</b>        | 139.52  | 0.407612  | 8.41906     | 2.90024E-12 |
| <b>Gad1</b>          | 138.954 | 2.81171   | 5.62701     | 0.00518986  |
| <b>Fam107a</b>       | 137.026 | 1.23137   | 6.79804     | 9.11655E-06 |
| <b>Glr3</b>          | 132.41  | 0.316906  | 8.70674     | 1.60716E-12 |
| <b>Nell2</b>         | 130.866 | 0.0308739 | 12.0494     | 0.0195705   |
| <b>AC165162.1</b>    | 127.993 | 0         | 1.7977E+308 | 0.0397092   |
| <b>Napb</b>          | 125.007 | 0.237096  | 9.04232     | 7.20281E-11 |
| <b>Phactr1</b>       | 124.396 | 0.906819  | 7.09991     | 0           |
| <b>Baal3</b>         | 123.407 | 0         | 1.7977E+308 | 0           |



|                      |         |           |             |             |
|----------------------|---------|-----------|-------------|-------------|
| <b>3110035E14Rik</b> | 123.222 | 0.124684  | 9.94877     | 3.19424E-08 |
| <b>Atp1a2</b>        | 122.373 | 1.3511    | 6.50101     | 0           |
| <b>Snord42b</b>      | 121.043 | 0         | 1.7977E+308 | 0.0365186   |
| <b>Rab6b</b>         | 119.939 | 1.32317   | 6.50216     | 0           |
| <b>Stx1a</b>         | 117.288 | 2.68753   | 5.44763     | 0           |
| <b>Fam131a</b>       | 115.267 | 2.03943   | 5.82067     | 0.0162823   |
| <b>Dclk1</b>         | 114.431 | 0.79866   | 7.16268     | 0           |
| <b>Ppp2r2c</b>       | 114.157 | 0.0684411 | 10.7039     | 8.97741E-10 |
| <b>Adap1</b>         | 113.468 | 1.45768   | 6.28247     | 1.98022E-06 |
| <b>Apbb1</b>         | 113.34  | 1.28485   | 6.46291     | 0           |
| <b>Atp1b2</b>        | 112.72  | 1.5499    | 6.18442     | 1.33718E-15 |
| <b>Nefl</b>          | 111.462 | 0.0836798 | 10.3794     | 2.99669E-09 |
| <b>Mef2c</b>         | 108.165 | 1.39774   | 6.27399     | 0           |
| <b>Ngef</b>          | 105.317 | 2.05956   | 5.67626     | 1.3296E-13  |
| <b>Homer1</b>        | 104.796 | 2.16925   | 5.59424     | 0           |
| <b>Fbxl16</b>        | 104.175 | 1.77917   | 5.87167     | 0           |
| <b>SNORD107</b>      | 103.708 | 0         | 1.7977E+308 | 0.0404771   |
| <b>N28178</b>        | 103.265 | 0.471181  | 7.77585     | 0.00311053  |
| <b>Slc22a17</b>      | 103.264 | 2.15092   | 5.58523     | 0           |
| <b>Mmd</b>           | 102.524 | 1.79946   | 5.83226     | 0           |
| <b>Acsl6</b>         | 101.563 | 2.3717    | 5.42031     | 2.94221E-07 |
| <b>Gng13</b>         | 101.089 | 0         | 1.7977E+308 | 0           |
| <b>Sez6l2</b>        | 99.5256 | 2.12897   | 5.54684     | 2.77891E-06 |
| <b>Pdp1</b>          | 99.2632 | 2.54735   | 5.28419     | 0           |
| <b>Ddn</b>           | 99.0371 | 0         | 1.7977E+308 | 0           |
| <b>Pvalb</b>         | 98.6918 | 0         | 1.7977E+308 | 0           |
| <b>Gap43</b>         | 98.6198 | 0.475306  | 7.69688     | 1.50346E-05 |
| <b>Tmem59l</b>       | 98.3374 | 0.59435   | 7.37028     | 2.27005E-11 |
| <b>Sh3gl2</b>        | 95.989  | 0.352503  | 8.08909     | 1.15602E-12 |
| <b>Phyhipl</b>       | 95.4558 | 0.367475  | 8.02104     | 2.00596E-10 |
| <b>Sv2b</b>          | 95.1837 | 0.033737  | 11.4622     | 0.00480143  |
| <b>Ttc9b</b>         | 93.9266 | 0         | 1.7977E+308 | 0           |
| <b>Trnp1</b>         | 93.6591 | 1.33851   | 6.12872     | 2.10925E-06 |
| <b>Lrp11</b>         | 92.0198 | 1.26227   | 6.18785     | 0           |
| <b>Cend1</b>         | 92.0003 | 0.369003  | 7.96186     | 2.40994E-07 |
| <b>AL663027.1</b>    | 91.916  | 0         | 1.7977E+308 | 0.0368755   |
| <b>Mras</b>          | 91.2277 | 0.70859   | 7.00838     | 4.08252E-06 |
| <b>Rab15</b>         | 91.1028 | 0.128922  | 9.46485     | 1.50103E-07 |
| <b>Slc6a17</b>       | 89.6989 | 0.618202  | 7.18087     | 0.00608213  |
| <b>AL672259.1</b>    | 88.4841 | 0         | 1.7977E+308 | 0.0112673   |
| <b>Ntm</b>           | 88.4566 | 2.72983   | 5.01809     | 0.000258693 |
| <b>Itpr1</b>         | 88.4411 | 2.23443   | 5.30674     | 0           |
| <b>Cdk14</b>         | 87.9887 | 1.47874   | 5.89487     | 0           |
| <b>Lynx1</b>         | 87.2553 | 1.41351   | 5.94789     | 0           |
| <b>Scamp5</b>        | 86.0576 | 1.11007   | 6.27658     | 0           |
| <b>Syn2</b>          | 85.5581 | 2.38995   | 5.16185     | 0           |

|                      |         |           |             |             |
|----------------------|---------|-----------|-------------|-------------|
| <b>Camkv</b>         | 85.3035 | 0.155546  | 9.09912     | 8.80324E-09 |
| <b>Pla2g7</b>        | 84.8681 | 2.25125   | 5.23642     | 0           |
| <b>Mal</b>           | 84.7418 | 1.54026   | 5.78183     | 0.000285815 |
| <b>Gng3</b>          | 84.4337 | 0.342702  | 7.94472     | 2.19505E-09 |
| <b>A030009H04Rik</b> | 83.5404 | 0.234112  | 8.47913     | 9.07573E-08 |
| <b>Rian</b>          | 83.5351 | 2.04109   | 5.35497     | 0           |
| <b>Fam171b</b>       | 82.2249 | 0.120362  | 9.41606     | 1.07337E-13 |
| <b>Khdrbs3</b>       | 81.8253 | 1.13426   | 6.17273     | 0           |
| <b>Elmod1</b>        | 81.7243 | 0         | 1.7977E+308 | 0           |
| <b>Zcchc18</b>       | 81.723  | 0.668091  | 6.93455     | 3.23418E-13 |
| <b>Epb4.9</b>        | 81.4166 | 0.682457  | 6.89844     | 0           |
| <b>Dkk3</b>          | 81.3902 | 1.43896   | 5.82176     | 0           |
| <b>Sept3</b>         | 80.6077 | 0.0971838 | 9.69599     | 7.58235E-10 |
| <b>Brsk1</b>         | 80.2082 | 0.583309  | 7.10334     | 0           |
| <b>Tceal3</b>        | 80.0377 | 1.54711   | 5.69303     | 0.00291847  |
| <b>Dnajc6</b>        | 79.0363 | 1.569     | 5.6546      | 2.81126E-06 |
| <b>Atp2b2</b>        | 78.8671 | 0.174915  | 8.81663     | 1.20853E-13 |
| <b>Gm17505</b>       | 78.3764 | 0         | 1.7977E+308 | 0.0186283   |
| <b>Cap2</b>          | 78.3453 | 0.144558  | 9.08206     | 1.85241E-05 |
| <b>Fxyd7</b>         | 77.1521 | 0.549968  | 7.13221     | 6.72016E-05 |
| <b>Pgm2l1</b>        | 76.7723 | 1.67067   | 5.52209     | 0           |
| <b>Gnb5</b>          | 75.6528 | 1.24062   | 5.93026     | 1.19973E-06 |
| <b>Kalrn</b>         | 75.2347 | 1.82206   | 5.36776     | 0           |
| <b>Gjb6</b>          | 74.8621 | 0         | 1.7977E+308 | 3.5855E-22  |
| <b>SNORD113</b>      | 74.4966 | 0         | 1.7977E+308 | 0.0448642   |
| <b>Mtap1a</b>        | 74.4662 | 0.214847  | 8.43714     | 0           |
| <b>Gm14480</b>       | 74.3939 | 1.39937   | 5.73233     | 0.00933999  |
| <b>Spock2</b>        | 74.276  | 2.19406   | 5.08122     | 0           |
| <b>Syt4</b>          | 74.0337 | 0.177187  | 8.70676     | 3.36794E-12 |
| <b>Rasgrp1</b>       | 73.6512 | 0.54705   | 7.07289     | 0           |
| <b>Spnb3</b>         | 73.6116 | 2.64631   | 4.79788     | 0           |
| <b>AC102815.1</b>    | 73.0969 | 0         | 1.7977E+308 | 0.0275794   |
| <b>Extl2</b>         | 70.8821 | 2.66714   | 4.73205     | 2.53356E-13 |
| <b>Nrxn2</b>         | 70.7713 | 1.59958   | 5.4674      | 0.000154406 |
| <b>Rell2</b>         | 70.0679 | 1.40644   | 5.63864     | 0.00262849  |
| <b>Caly</b>          | 69.9362 | 0.343415  | 7.66994     | 0.000742982 |
| <b>Ttll7</b>         | 69.7429 | 1.90651   | 5.19304     | 0           |
| <b>n-R5s202</b>      | 69.5807 | 0         | 1.7977E+308 | 0.000672347 |
| <b>Sv2a</b>          | 69.3503 | 0.985471  | 6.13694     | 1.35722E-06 |
| <b>Luzp2</b>         | 68.8262 | 0         | 1.7977E+308 | 0           |
| <b>Tubb2b</b>        | 68.7908 | 2.25001   | 4.93421     | 0           |
| <b>Rims1</b>         | 68.6417 | 0.843659  | 6.34628     | 0           |
| <b>Fgf13</b>         | 68.5081 | 0         | 1.7977E+308 | 2.83332E-22 |
| <b>Ncs1</b>          | 68.5039 | 0.727849  | 6.5564      | 0.005089    |
| <b>Cadm2</b>         | 68.1533 | 0.0158106 | 12.0737     | 0.000319688 |
| <b>Lin7b</b>         | 67.6342 | 0.796622  | 6.40771     | 0.0420702   |

|                      |         |           |             |             |
|----------------------|---------|-----------|-------------|-------------|
| <b>Hlf</b>           | 67.6089 | 0.620335  | 6.76802     | 2.49865E-06 |
| <b>Serp2</b>         | 67.0177 | 0         | 1.7977E+308 | 0           |
| <b>Gria1</b>         | 66.5307 | 0         | 1.7977E+308 | 0           |
| <b>Ephx4</b>         | 66.2216 | 0.706188  | 6.55111     | 3.22051E-09 |
| <b>Faim2</b>         | 65.4852 | 0.379728  | 7.43006     | 0           |
| <b>Cnih2</b>         | 65.2898 | 0         | 1.7977E+308 | 0           |
| <b>Syt13</b>         | 65.1314 | 1.69493   | 5.26405     | 0           |
| <b>C530028O21Rik</b> | 64.9071 | 1.65114   | 5.29685     | 1.65597E-09 |
| <b>Dtx3</b>          | 64.5461 | 1.55926   | 5.3714      | 0.0280652   |
| <b>Wdr47</b>         | 64.1515 | 2.66519   | 4.58917     | 9.4143E-09  |
| <b>Gng2</b>          | 63.0678 | 2.26018   | 4.8024      | 0.0023157   |
| <b>Cdk5r2</b>        | 62.9733 | 0         | 1.7977E+308 | 0           |
| <b>Dlg2</b>          | 62.6842 | 0.866679  | 6.17646     | 0           |
| <b>Lypd1</b>         | 62.554  | 0.965412  | 6.01781     | 1.35364E-11 |
| <b>Car11</b>         | 61.8793 | 2.90306   | 4.41381     | 0           |
| <b>Diras2</b>        | 61.7653 | 0.229758  | 8.07054     | 0           |
| <b>Mpped1</b>        | 61.5199 | 0         | 1.7977E+308 | 0           |
| <b>Syt5</b>          | 61.5074 | 0.634305  | 6.59944     | 2.76417E-11 |
| <b>Cntn1</b>         | 61.1655 | 0.196363  | 8.28305     | 7.92845E-13 |
| <b>Cacnb4</b>        | 61.1182 | 0.119462  | 8.99891     | 1.04114E-14 |
| <b>Ptprn</b>         | 61.0587 | 1.00785   | 5.92084     | 0           |
| <b>Rbfox3</b>        | 61.0104 | 0         | 1.7977E+308 | 0           |
| <b>Nol4</b>          | 60.9049 | 1.08426   | 5.81178     | 0.00086956  |
| <b>U6</b>            | 60.8485 | 0         | 1.7977E+308 | 0.00508487  |
| <b>Celf4</b>         | 60.4256 | 0.347384  | 7.44249     | 0           |
| <b>Rph3a</b>         | 60.3183 | 0.24891   | 7.92083     | 0           |
| <b>Pex5l</b>         | 60.1644 | 0.284017  | 7.72679     | 1.69506E-05 |
| <b>Sgtb</b>          | 60.0889 | 1.03725   | 5.85626     | 1.63187E-07 |
| <b>Rasl10b</b>       | 59.6727 | 0.165379  | 8.49515     | 2.01728E-07 |
| <b>Necab3</b>        | 59.58   | 0         | 1.7977E+308 | 0           |
| <b>Nrxn1</b>         | 59.1637 | 0.221325  | 8.0624      | 2.33019E-11 |
| <b>Cacnb3</b>        | 58.9543 | 1.29348   | 5.51027     | 0           |
| <b>Hmgn3</b>         | 58.9032 | 2.53731   | 4.53697     | 1.67634E-08 |
| <b>Nrcam</b>         | 58.4547 | 0.0458747 | 10.3154     | 0.002671    |
| <b>Camk2g</b>        | 58.2272 | 2.12043   | 4.77926     | 0           |
| <b>Impact</b>        | 58.021  | 0.820467  | 6.14399     | 0           |
| <b>Dnajb5</b>        | 57.8948 | 0.930959  | 5.95857     | 0           |
| <b>Kifc2</b>         | 57.0227 | 0.853269  | 6.06239     | 0           |
| <b>Snca</b>          | 56.9091 | 0.889696  | 5.9992      | 1.32992E-06 |
| <b>Fabp3-ps1</b>     | 56.7363 | 0         | 1.7977E+308 | 0           |
| <b>Agap2</b>         | 56.5815 | 0.154312  | 8.51834     | 1.503E-11   |
| <b>Slc12a5</b>       | 56.5158 | 0.176063  | 8.32641     | 0.00271597  |
| <b>Fabp3</b>         | 56.5151 | 0.305307  | 7.53223     | 0.00465889  |
| <b>Car2</b>          | 56.302  | 1.02551   | 5.77877     | 1.33718E-15 |
| <b>Gpr3711</b>       | 56.2933 | 0.128618  | 8.77373     | 6.67711E-07 |
| <b>Cspg5</b>         | 56.0788 | 0         | 1.7977E+308 | 0           |

|                      |         |           |             |             |
|----------------------|---------|-----------|-------------|-------------|
| <b>Fmn1</b>          | 55.9239 | 2.25888   | 4.62978     | 0.000920569 |
| <b>Egr1</b>          | 55.6691 | 0.5608    | 6.63325     | 0           |
| <b>Gm14703</b>       | 55.5434 | 0.474171  | 6.87206     | 2.83189E-10 |
| <b>Dbc1</b>          | 55.0922 | 0         | 1.7977E+308 | 0           |
| <b>Myh10</b>         | 54.9231 | 1.93754   | 4.82511     | 0.00141181  |
| <b>Snord35b</b>      | 54.7635 | 0         | 1.7977E+308 | 0.0427276   |
| <b>A830010M20Rik</b> | 54.6596 | 0.710748  | 6.26499     | 3.30524E-13 |
| <b>Acsbg1</b>        | 54.5131 | 0         | 1.7977E+308 | 0           |
| <b>Matk</b>          | 54.4567 | 0.110924  | 8.93939     | 3.88959E-07 |
| <b>Nefm</b>          | 54.3127 | 0.0849081 | 9.32117     | 1.14522E-07 |
| <b>Spock1</b>        | 54.2983 | 0.423028  | 7.00401     | 0.000742734 |
| <b>Gria2</b>         | 54.0772 | 0.0400656 | 10.3984     | 0.00027866  |
| <b>Psd3</b>          | 53.5812 | 1.13599   | 5.5597      | 0           |
| <b>Ppp2r2b</b>       | 53.5705 | 0.749729  | 6.15893     | 2.83054E-13 |
| <b>Bcas1</b>         | 53.4971 | 0.96196   | 5.79734     | 0.000173563 |
| <b>Apbb2</b>         | 53.4803 | 2.60255   | 4.36101     | 8.84142E-07 |
| <b>S100b</b>         | 52.8998 | 0         | 1.7977E+308 | 0           |
| <b>Slc39a10</b>      | 52.8256 | 1.01267   | 5.705       | 0           |
| <b>Rufy3</b>         | 52.6682 | 2.8345    | 4.21576     | 0           |
| <b>Rasgef1a</b>      | 52.4003 | 0.215992  | 7.92245     | 4.48852E-08 |
| <b>Lingo1</b>        | 52.3604 | 0         | 1.7977E+308 | 0           |
| <b>Ablim2</b>        | 52.3434 | 2.40122   | 4.44617     | 0.000953279 |
| <b>Flywch1</b>       | 52.143  | 2.18095   | 4.57944     | 0           |
| <b>Gucy1b3</b>       | 51.9995 | 0.712092  | 6.19029     | 0           |
| <b>Dock3</b>         | 51.2374 | 0.405083  | 6.98283     | 0           |
| <b>Syng3</b>         | 51.2241 | 0         | 1.7977E+308 | 0           |
| <b>Mapk8ip2</b>      | 50.7612 | 0.136856  | 8.53493     | 1.42369E-14 |
| <b>Cdk5r1</b>        | 50.7382 | 0         | 1.7977E+308 | 0           |
| <b>Pdpx</b>          | 50.4123 | 0.935819  | 5.7514      | 0           |
| <b>Pkia</b>          | 50.3883 | 1.5097    | 5.06075     | 0           |
| <b>Arc</b>           | 50.3667 | 0.191306  | 8.04044     | 1.53826E-07 |
| <b>Rgs7</b>          | 50.1621 | 0.645328  | 6.28042     | 8.09887E-06 |
| <b>Nptxr</b>         | 50.1215 | 0.247748  | 7.66041     | 0.0399562   |
| <b>Gabbr2</b>        | 49.6989 | 0.0878439 | 9.14406     | 2.38945E-13 |
| <b>Gprasp2</b>       | 49.4775 | 1.55727   | 4.98968     | 0.0122533   |
| <b>Atf1</b>          | 49.2848 | 0.520172  | 6.56601     | 0           |
| <b>Svop</b>          | 49.1767 | 0         | 1.7977E+308 | 0           |
| <b>Syne1</b>         | 49.1431 | 1.22137   | 5.33041     | 0           |
| <b>Stk32c</b>        | 48.8638 | 0.645058  | 6.2432      | 4.6632E-10  |
| <b>Omg</b>           | 48.7619 | 0         | 1.7977E+308 | 0           |
| <b>Arhgef4</b>       | 48.6215 | 1.12726   | 5.4307      | 3.63624E-09 |
| <b>Chst1</b>         | 48.4458 | 0.876058  | 5.7892      | 0           |
| <b>Lpcat4</b>        | 48.4229 | 0.472887  | 6.67805     | 1.43407E-11 |
| <b>Snn</b>           | 48.4142 | 1.65999   | 4.86618     | 0           |
| <b>Cyp46a1</b>       | 47.8026 | 0         | 1.7977E+308 | 0           |
| <b>Ntrk2</b>         | 47.7759 | 2.62002   | 4.18863     | 0           |

|                      |         |           |             |             |
|----------------------|---------|-----------|-------------|-------------|
| <b>Wasf1</b>         | 47.7747 | 0.407317  | 6.87395     | 3.87926E-10 |
| <b>Mlc1</b>          | 47.6441 | 0.103002  | 8.85349     | 0.000424786 |
| <b>Slc24a2</b>       | 47.4777 | 0.0427415 | 10.1174     | 6.41555E-08 |
| <b>Ephb6</b>         | 47.3912 | 1.10592   | 5.4213      | 0.000309218 |
| <b>Lmbr1</b>         | 47.2437 | 0.666972  | 6.14635     | 6.60949E-13 |
| <b>Myl4</b>          | 47.2435 | 0.571709  | 6.36869     | 0.0495125   |
| <b>Actr3b</b>        | 46.9316 | 0.296523  | 7.30627     | 0.000210743 |
| <b>Gm10337</b>       | 46.8    | 0         | 1.7977E+308 | 2.28078E-07 |
| <b>Nap1l2</b>        | 46.3919 | 0.194418  | 7.89857     | 7.21066E-07 |
| <b>Rasgrf2</b>       | 46.291  | 0.854904  | 5.75882     | 0.00343271  |
| <b>St3gal5</b>       | 45.9272 | 1.38649   | 5.04983     | 0           |
| <b>Amph</b>          | 45.9114 | 0.277032  | 7.37266     | 8.57882E-11 |
| <b>Slc6a1</b>        | 45.7836 | 0.065029  | 9.45953     | 7.3766E-08  |
| <b>Fam115a</b>       | 45.7646 | 1.54704   | 4.88665     | 0.000186496 |
| <b>Scn2b</b>         | 45.6138 | 0.273063  | 7.38409     | 2.65507E-15 |
| <b>Olfm2</b>         | 45.2402 | 0.734347  | 5.945       | 1.43848E-13 |
| <b>C1qtnf4</b>       | 45.1377 | 0         | 1.7977E+308 | 0           |
| <b>Pgbd5</b>         | 45.1066 | 0         | 1.7977E+308 | 0           |
| <b>Rusc2</b>         | 44.9804 | 2.69199   | 4.06255     | 0.0114558   |
| <b>Dlgap3</b>        | 44.9681 | 1.25801   | 5.15969     | 0           |
| <b>6430704M03Rik</b> | 44.8553 | 0.147718  | 8.24629     | 0           |
| <b>Fbxo44</b>        | 44.818  | 0.891975  | 5.65093     | 4.05402E-09 |
| <b>Tmem151a</b>      | 44.8147 | 0.257804  | 7.44155     | 6.17948E-14 |
| <b>Calb1</b>         | 44.2833 | 0         | 1.7977E+308 | 0           |
| <b>Lphn1</b>         | 43.9998 | 2.5115    | 4.13088     | 2.28469E-05 |
| <b>Negr1</b>         | 43.9754 | 0.163178  | 8.07411     | 1.5777E-09  |
| <b>Cacng3</b>        | 43.9301 | 0         | 1.7977E+308 | 0           |
| <b>AC163349.1</b>    | 43.7578 | 0         | 1.7977E+308 | 0.00863129  |
| <b>Mtap7d2</b>       | 43.5769 | 0.126896  | 8.42377     | 1.52423E-05 |
| <b>Pacsin1</b>       | 43.4174 | 0.183909  | 7.88314     | 0.0012732   |
| <b>Cpne9</b>         | 43.3612 | 0.0859503 | 8.97869     | 0.000076652 |
| <b>6030419C18Rik</b> | 43.3479 | 0.648656  | 6.06236     | 0.000186866 |
| <b>Ube2ql1</b>       | 42.9735 | 0         | 1.7977E+308 | 0           |
| <b>Cbx8</b>          | 42.3956 | 0.676401  | 5.96989     | 0.0447778   |
| <b>Gabrb3</b>        | 42.3802 | 0.360724  | 6.87635     | 0.0129889   |
| <b>Tmcc2</b>         | 42.3166 | 1.07453   | 5.29944     | 6.54789E-07 |
| <b>Ank2</b>          | 42.2297 | 0.485766  | 6.44185     | 0           |
| <b>Slc2a3</b>        | 42.2069 | 0.234959  | 7.48892     | 0           |
| <b>Palm</b>          | 42.0228 | 1.81087   | 4.53642     | 0           |
| <b>Ppp1r1a</b>       | 41.9507 | 1.82681   | 4.5213      | 2.5056E-12  |
| <b>Golga7b</b>       | 41.9036 | 0.377688  | 6.79374     | 2.33785E-07 |
| <b>Acap3</b>         | 41.8871 | 2.08224   | 4.3303      | 1.44326E-07 |
| <b>Synpr</b>         | 41.7889 | 0.27837   | 7.22997     | 1.57921E-08 |
| <b>Nptx1</b>         | 41.7526 | 0.175538  | 7.89394     | 1.16511E-12 |
| <b>Car10</b>         | 41.6954 | 0.894435  | 5.54277     | 0           |
| <b>Tceal6</b>        | 41.6741 | 0.596491  | 6.12651     | 0.0009523   |

|                      |         |           |             |             |
|----------------------|---------|-----------|-------------|-------------|
| <b>Dpp10</b>         | 41.5963 | 1.11468   | 5.22176     | 0.000150181 |
| <b>Sprn</b>          | 41.5411 | 0.0617335 | 9.39427     | 0.00020206  |
| <b>Gm13306</b>       | 41.4873 | 2.26731   | 4.19362     | 0.0281636   |
| <b>Cldn11</b>        | 41.4177 | 0         | 1.7977E+308 | 0           |
| <b>Vamp1</b>         | 41.1754 | 1.01718   | 5.33914     | 1.03691E-11 |
| <b>Gabbr2</b>        | 41.1257 | 0.117688  | 8.44893     | 3.11418E-11 |
| <b>Gria3</b>         | 41.0244 | 1.60007   | 4.68028     | 0           |
| <b>Tmx4</b>          | 40.9295 | 2.05578   | 4.31538     | 0           |
| <b>Sgip1</b>         | 40.8081 | 2.50115   | 4.02819     | 0           |
| <b>Rtn2</b>          | 40.6261 | 0.612476  | 6.05161     | 5.12794E-05 |
| <b>Tmem178</b>       | 40.5295 | 0.126913  | 8.31899     | 0.00204246  |
| <b>6030419C18Rik</b> | 40.5289 | 0         | 1.7977E+308 | 0           |
| <b>Tmod2</b>         | 40.1629 | 0.832297  | 5.59262     | 0           |
| <b>Gpr162</b>        | 40.0414 | 0         | 1.7977E+308 | 0           |
| <b>Rnf112</b>        | 39.9711 | 0.188457  | 7.72858     | 0.000316952 |
| <b>Epdr1</b>         | 39.8843 | 1.83132   | 4.44487     | 0           |
| <b>Ptprs</b>         | 39.283  | 1.9982    | 4.29713     | 8.44352E-11 |
| <b>Abi2</b>          | 39.2155 | 1.43859   | 4.7687      | 0           |
| <b>Lsamp</b>         | 39.1758 | 0.813199  | 5.59021     | 0.0246981   |
| <b>Cnksr2</b>        | 39.0063 | 0.0160163 | 11.2499     | 0.0480676   |
| <b>Ntsr2</b>         | 38.9982 | 0         | 1.7977E+308 | 0           |
| <b>Ptpn5</b>         | 38.9407 | 1.13245   | 5.10376     | 0.00191468  |
| <b>Lgi1</b>          | 38.6482 | 0.389815  | 6.63147     | 0           |
| <b>Scn2a1</b>        | 38.5689 | 0.0391499 | 9.94421     | 0.000104353 |
| <b>Adcy1</b>         | 38.2802 | 0         | 1.7977E+308 | 0           |
| <b>Ina</b>           | 38.2731 | 0.0959501 | 8.63983     | 2.01113E-07 |
| <b>Sfxn5</b>         | 38.0643 | 2.37057   | 4.00514     | 0           |
| <b>Pcp4l1</b>        | 38.0132 | 1.57788   | 4.59044     | 3.28188E-13 |
| <b>Ankrd13d</b>      | 37.7911 | 0         | 1.7977E+308 | 0           |
| <b>Rasgrf1</b>       | 37.6607 | 0.0809497 | 8.86182     | 3.05912E-05 |
| <b>Arhgef25</b>      | 37.6412 | 1.3815    | 4.76801     | 0           |
| <b>Rnf208</b>        | 37.5142 | 2.16137   | 4.11742     | 0.000179771 |
| <b>Lrrc4c</b>        | 37.4134 | 0.160616  | 7.86379     | 0.000104744 |
| <b>Vgf</b>           | 37.2638 | 0         | 1.7977E+308 | 0           |
| <b>Bai1</b>          | 37.2157 | 0.0491672 | 9.564       | 7.02384E-05 |
| <b>Scrn1</b>         | 37.1884 | 1.01706   | 5.19238     | 0           |
| <b>Efha2</b>         | 37.0503 | 1.77891   | 4.38042     | 0           |
| <b>Nnat</b>          | 36.9686 | 0.519176  | 6.15393     | 0.00106864  |
| <b>Mtap1b</b>        | 36.9279 | 0.605446  | 5.93057     | 1.33718E-15 |
| <b>Crhr1</b>         | 36.9193 | 0         | 1.7977E+308 | 2.12614E-13 |
| <b>Adcy2</b>         | 36.617  | 0.412298  | 6.47268     | 0           |
| <b>Ap3m2</b>         | 36.4942 | 1.33518   | 4.77256     | 0           |
| <b>Ap3b2</b>         | 36.4346 | 0.520915  | 6.12812     | 1.40563E-06 |
| <b>Abcc5</b>         | 36.416  | 1.69695   | 4.42355     | 1.74491E-08 |
| <b>Dusp14</b>        | 36.2278 | 0         | 1.7977E+308 | 0           |
| <b>Rab3b</b>         | 36.1937 | 0         | 1.7977E+308 | 0           |

|                      |         |           |             |             |
|----------------------|---------|-----------|-------------|-------------|
| <b>Gm13390</b>       | 36.1225 | 0         | 1.7977E+308 | 0.000414584 |
| <b>Nkain2</b>        | 35.9799 | 0         | 1.7977E+308 | 2.38863E-13 |
| <b>AI593442</b>      | 35.669  | 0         | 1.7977E+308 | 0           |
| <b>Sphkap</b>        | 35.6167 | 0.644889  | 5.78736     | 0           |
| <b>Rgs7bp</b>        | 35.57   | 0.0965057 | 8.52583     | 1.1365E-11  |
| <b>Cds1</b>          | 35.2134 | 1.22354   | 4.84699     | 0.00555094  |
| <b>Snph</b>          | 35.2002 | 0.207318  | 7.40759     | 3.81001E-08 |
| <b>Gm2506</b>        | 35.0573 | 2.00613   | 4.12723     | 0.0378159   |
| <b>Rit2</b>          | 35.0091 | 0         | 1.7977E+308 | 0           |
| <b>Pnmal2</b>        | 35.0026 | 2.17466   | 4.0086      | 0           |
| <b>Kcnq2</b>         | 34.9908 | 0.217372  | 7.33067     | 0           |
| <b>Anks1b</b>        | 34.7102 | 0.998724  | 5.11913     | 0           |
| <b>Nat8l</b>         | 34.6206 | 0.103612  | 8.3843      | 2.16597E-11 |
| <b>Vip</b>           | 34.6017 | 0.871491  | 5.31121     | 4.32643E-06 |
| <b>Slc7a10</b>       | 34.4958 | 0.140923  | 7.93537     | 0.00144554  |
| <b>Vstm2a</b>        | 34.4917 | 0.429113  | 6.32875     | 8.03736E-07 |
| <b>Kcnip4</b>        | 34.3357 | 0.496342  | 6.11223     | 0.0449846   |
| <b>Galnt9</b>        | 34.2423 | 0         | 1.7977E+308 | 0           |
| <b>Gabrd</b>         | 34.2157 | 0         | 1.7977E+308 | 0           |
| <b>Mmd2</b>          | 34.1218 | 0.210861  | 7.33826     | 5.69449E-09 |
| <b>Evl</b>           | 34.102  | 2.06609   | 4.04489     | 0           |
| <b>Fbxo2</b>         | 34.0457 | 0         | 1.7977E+308 | 0           |
| <b>Pnmal1</b>        | 33.8509 | 0.219278  | 7.27029     | 0.00075381  |
| <b>2310028H24Rik</b> | 33.8155 | 1.88855   | 4.16233     | 0.0042809   |
| <b>1500009C09Rik</b> | 33.7658 | 0.200684  | 7.3945      | 0.00387743  |
| <b>Kif3c</b>         | 33.6459 | 1.63382   | 4.36411     | 0           |
| <b>Elavl4</b>        | 33.612  | 1.29656   | 4.69621     | 0.0103852   |
| <b>Jph3</b>          | 33.5779 | 0.196784  | 7.41476     | 7.58678E-05 |
| <b>Edil3</b>         | 33.5195 | 0.169886  | 7.62429     | 2.5793E-09  |
| <b>Reep2</b>         | 33.4688 | 0.267539  | 6.96692     | 0.000014463 |
| <b>Fam19a5</b>       | 33.3364 | 1.81305   | 4.2006      | 1.24787E-11 |
| <b>Arnt2</b>         | 33.2417 | 0.30431   | 6.77131     | 0           |
| <b>Cnih3</b>         | 33.2327 | 0         | 1.7977E+308 | 0           |
| <b>Cacna2d1</b>      | 33.1942 | 0.710391  | 5.54618     | 5.67985E-09 |
| <b>Tmem47</b>        | 32.9783 | 1.17696   | 4.80838     | 0           |
| <b>Epb4.1l3</b>      | 32.6965 | 0.702069  | 5.54138     | 0           |
| <b>Dync1i1</b>       | 32.6479 | 0         | 1.7977E+308 | 0           |
| <b>Kcnv1</b>         | 32.6111 | 0         | 1.7977E+308 | 0           |
| <b>Dpysl2</b>        | 32.4908 | 0.824654  | 5.3001      | 0           |
| <b>Sipa1l1</b>       | 32.3467 | 0.737541  | 5.45475     | 0           |
| <b>Cntfr</b>         | 32.2946 | 0.838808  | 5.26681     | 0.00131657  |
| <b>St8sia3</b>       | 32.293  | 0.0306587 | 10.0407     | 0.00010341  |
| <b>Mmp17</b>         | 32.0221 | 0.231649  | 7.11099     | 1.1676E-10  |
| <b>Actl6b</b>        | 31.9744 | 0         | 1.7977E+308 | 0           |
| <b>Ctnna2</b>        | 31.6944 | 0         | 1.7977E+308 | 0           |
| <b>Fam131b</b>       | 31.6761 | 0.232245  | 7.0916      | 1.91681E-07 |

|                      |         |           |             |             |
|----------------------|---------|-----------|-------------|-------------|
| <b>Agpat4</b>        | 31.6056 | 1.13777   | 4.7959      | 2.69694E-05 |
| <b>Ggt7</b>          | 31.5383 | 0.500804  | 5.97672     | 0.000031282 |
| <b>Lrrc49</b>        | 31.4889 | 0.981042  | 5.00439     | 0.000365242 |
| <b>Lrrtm3</b>        | 31.4747 | 0         | 1.7977E+308 | 0           |
| <b>Crmp1</b>         | 31.4093 | 0         | 1.7977E+308 | 0           |
| <b>Aatk</b>          | 31.3064 | 1.53386   | 4.35122     | 0.0346529   |
| <b>Neurod6</b>       | 31.2161 | 0         | 1.7977E+308 | 0           |
| <b>Npcd</b>          | 31.2092 | 0.639855  | 5.60808     | 0           |
| <b>Jph4</b>          | 31.1758 | 0.466431  | 6.06262     | 1.02436E-13 |
| <b>Tmem130</b>       | 31.1705 | 0         | 1.7977E+308 | 0           |
| <b>Ipcef1</b>        | 31.084  | 0.0348657 | 9.80015     | 0.000209721 |
| <b>Cpne5</b>         | 31.0717 | 0.0835406 | 8.53891     | 4.0634E-10  |
| <b>Ak5</b>           | 31.0556 | 1.18596   | 4.71073     | 0           |
| <b>Elavl2</b>        | 30.9443 | 0.126852  | 7.93038     | 0.000512286 |
| <b>Tmem132a</b>      | 30.8671 | 0.785174  | 5.29691     | 0           |
| <b>Speg</b>          | 30.7918 | 0.28908   | 6.73494     | 0.0383619   |
| <b>Rims3</b>         | 30.6522 | 0.152799  | 7.64821     | 5.28224E-12 |
| <b>Elmo1</b>         | 30.6236 | 1.2182    | 4.65182     | 1.04114E-14 |
| <b>Kcnj10</b>        | 30.574  | 0         | 1.7977E+308 | 0           |
| <b>Fndc4</b>         | 30.5605 | 0.679416  | 5.49123     | 1.75402E-06 |
| <b>Osbp2</b>         | 30.5062 | 0.352706  | 6.43449     | 8.8515E-09  |
| <b>Ccl27b</b>        | 30.4032 | 1.80254   | 4.07612     | 0.0255632   |
| <b>Pde1b</b>         | 30.3761 | 0.124982  | 7.92507     | 0.00244486  |
| <b>Dpp6</b>          | 30.3437 | 0.164459  | 7.52752     | 7.42779E-08 |
| <b>Btbd10</b>        | 30.2375 | 1.74546   | 4.11466     | 0           |
| <b>Bcat1</b>         | 30.1804 | 0.4419    | 6.09375     | 3.18861E-05 |
| <b>Nos1ap</b>        | 30.1131 | 1.03848   | 4.85784     | 0.00346503  |
| <b>AL603828.1</b>    | 30.0901 | 0         | 1.7977E+308 | 0.0329548   |
| <b>Bcan</b>          | 29.9279 | 0         | 1.7977E+308 | 0           |
| <b>Stac2</b>         | 29.7343 | 0.114326  | 8.02283     | 0.000179003 |
| <b>Ncam1</b>         | 29.6951 | 0.619963  | 5.5819      | 0           |
| <b>Cmtm5</b>         | 29.4787 | 0.620796  | 5.56941     | 0.0117666   |
| <b>A830039N20Rik</b> | 29.3476 | 0         | 1.7977E+308 | 0           |
| <b>Prkcc</b>         | 29.2915 | 0         | 1.7977E+308 | 0           |
| <b>Lmo3</b>          | 29.2889 | 0         | 1.7977E+308 | 0           |
| <b>Gfap</b>          | 29.2869 | 0.0779034 | 8.55435     | 0.00113092  |
| <b>Garnl3</b>        | 29.2445 | 0.593539  | 5.62268     | 0           |
| <b>2610524H06Rik</b> | 29.0289 | 0.550091  | 5.72167     | 0.000030152 |
| <b>6530418L21Rik</b> | 29.0004 | 0.213469  | 7.0859      | 2.82502E-05 |
| <b>Susd4</b>         | 28.987  | 0.695913  | 5.38035     | 0.00637806  |
| <b>Scrg1</b>         | 28.9365 | 0.532363  | 5.76434     | 0.0015355   |
| <b>Pcdha11</b>       | 28.9229 | 0.174244  | 7.37496     | 2.87989E-09 |
| <b>Rasal1</b>        | 28.9055 | 0.146188  | 7.62737     | 0.000107507 |
| <b>Tspan2</b>        | 28.8814 | 1.03917   | 4.79664     | 7.44903E-06 |
| <b>Nlgn2</b>         | 28.8305 | 0.429379  | 6.0692      | 0           |
| <b>Syt7</b>          | 28.822  | 0.654494  | 5.46065     | 0           |



|                 |         |           |             |             |
|-----------------|---------|-----------|-------------|-------------|
| <b>Trim2</b>    | 28.7501 | 1.7071    | 4.07395     | 0           |
| <b>L1cam</b>    | 28.682  | 0.678107  | 5.40249     | 0.021734    |
| <b>Ppp1r9a</b>  | 28.6789 | 0.782019  | 5.19664     | 0           |
| <b>Ppfia3</b>   | 28.6547 | 0.404694  | 6.14579     | 0           |
| <b>Gm14290</b>  | 28.5792 | 0.259958  | 6.78054     | 2.57475E-05 |
| <b>B3galnt1</b> | 28.3964 | 1.02475   | 4.79237     | 2.44895E-12 |
| <b>Kcnj3</b>    | 28.3737 | 0.179932  | 7.30096     | 4.29382E-05 |
| <b>Spire1</b>   | 28.3524 | 0.55796   | 5.66717     | 0           |
| <b>Pde4b</b>    | 28.1314 | 0.892311  | 4.97849     | 1.33718E-15 |
| <b>Slc8a2</b>   | 28.0089 | 0.259102  | 6.75622     | 9.21241E-10 |
| <b>Tmem90b</b>  | 27.9404 | 0.119861  | 7.86485     | 0.0114511   |
| <b>Slc25a18</b> | 27.9259 | 0         | 1.7977E+308 | 0           |
| <b>Spock3</b>   | 27.779  | 1.26477   | 4.45705     | 0           |
| <b>Tmem14a</b>  | 27.708  | 1.57011   | 4.14137     | 7.90466E-08 |
| <b>Vstm2l</b>   | 27.579  | 1.08017   | 4.67424     | 0.000272786 |
| <b>Cbln2</b>    | 27.5016 | 0.515955  | 5.73613     | 3.02706E-06 |
| <b>Adam22</b>   | 27.4604 | 0.529016  | 5.6979      | 5.08866E-07 |
| <b>Dact3</b>    | 27.0937 | 0.167562  | 7.33712     | 4.59234E-06 |
| <b>Jakmip1</b>  | 27.03   | 1.5752    | 4.10095     | 1.55657E-07 |
| <b>Hspa12a</b>  | 27.0034 | 0.235546  | 6.84099     | 0           |
| <b>Pdzd4</b>    | 26.9823 | 0.402966  | 6.06521     | 4.00838E-13 |
| <b>Rab3c</b>    | 26.9146 | 0.200345  | 7.06976     | 1.05887E-05 |
| <b>Cacng7</b>   | 26.8615 | 1.09434   | 4.61741     | 2.53356E-13 |
| <b>Magee1</b>   | 26.8325 | 0.393734  | 6.09062     | 1.93388E-13 |
| <b>B3gat1</b>   | 26.7472 | 0         | 1.7977E+308 | 0           |
| <b>Cpne6</b>    | 26.6551 | 0.11588   | 7.84564     | 8.45687E-07 |
| <b>Trim9</b>    | 26.6042 | 0.185235  | 7.16615     | 2.90941E-07 |
| <b>Mog</b>      | 26.5366 | 1.07852   | 4.62085     | 4.43658E-06 |
| <b>Nrip3</b>    | 26.5013 | 0         | 1.7977E+308 | 0           |
| <b>Asphd2</b>   | 26.4534 | 0         | 1.7977E+308 | 0           |
| <b>Syt16</b>    | 26.3432 | 0.119814  | 7.78049     | 0.00133647  |
| <b>Gfra4</b>    | 26.2287 | 0         | 1.7977E+308 | 0           |
| <b>Reep1</b>    | 26.0057 | 0.0714553 | 8.50757     | 0.0000015   |
| <b>Camk4</b>    | 25.8198 | 0.0756959 | 8.41404     | 1.33718E-15 |
| <b>Camkk1</b>   | 25.671  | 1.08497   | 4.56442     | 2.24502E-11 |
| <b>Cacnb1</b>   | 25.4866 | 0.314381  | 6.34108     | 3.38234E-07 |
| <b>Paqr8</b>    | 25.2366 | 0.173352  | 7.18567     | 1.11602E-10 |
| <b>Diras1</b>   | 25.2165 | 0         | 1.7977E+308 | 0           |
| <b>Ccdc85a</b>  | 25.1674 | 0.445651  | 5.8195      | 2.65507E-15 |
| <b>Gm13588</b>  | 25.0934 | 0         | 1.7977E+308 | 0.00804658  |
| <b>Gmpr</b>     | 24.9724 | 0         | 1.7977E+308 | 0           |
| <b>Epha4</b>    | 24.9013 | 0.254204  | 6.61409     | 0           |
| <b>SNORA40</b>  | 24.8859 | 0         | 1.7977E+308 | 0.0221433   |
| <b>Kcna6</b>    | 24.8423 | 0.322505  | 6.26734     | 9.99279E-06 |
| <b>Cttnbp2</b>  | 24.7891 | 1.27446   | 4.28175     | 0.00424636  |
| <b>Gdap111</b>  | 24.7685 | 0.614959  | 5.33187     | 1.17082E-05 |

|                      |         |           |             |             |
|----------------------|---------|-----------|-------------|-------------|
| <b>Mag</b>           | 24.6604 | 0         | 1.7977E+308 | 0           |
| <b>Prmt8</b>         | 24.6516 | 0         | 1.7977E+308 | 0           |
| <b>Tmem179</b>       | 24.599  | 0.299894  | 6.35801     | 8.37841E-07 |
| <b>Nmnat2</b>        | 24.5534 | 0         | 1.7977E+308 | 0           |
| <b>Satb1</b>         | 24.531  | 0.835402  | 4.87599     | 0.0370358   |
| <b>6330403A02Rik</b> | 24.4224 | 0.100616  | 7.92321     | 4.26979E-10 |
| <b>Gria4</b>         | 24.1776 | 0.17754   | 7.08938     | 2.49465E-06 |
| <b>Lrrc4b</b>        | 24.1019 | 0.17419   | 7.11234     | 9.18977E-06 |
| <b>D3Bwg0562e</b>    | 24.0191 | 0.118695  | 7.66078     | 2.01885E-09 |
| <b>Dner</b>          | 23.9709 | 0.0949927 | 7.97925     | 0.00019558  |
| <b>Slc1a1</b>        | 23.9436 | 0.0755912 | 8.30721     | 0.00206079  |
| <b>Hivep2</b>        | 23.8916 | 1.13998   | 4.38942     | 0           |
| <b>Gdap1</b>         | 23.7098 | 0.144877  | 7.35451     | 5.93871E-09 |
| <b>Gabra2</b>        | 23.6672 | 0         | 1.7977E+308 | 0           |
| <b>P4htm</b>         | 23.5229 | 0.810502  | 4.85911     | 6.263E-09   |
| <b>Erc2</b>          | 23.4508 | 0.791859  | 4.88825     | 0           |
| <b>Numbl</b>         | 23.4383 | 0.310415  | 6.23853     | 7.29728E-10 |
| <b>Neurl1a</b>       | 23.3388 | 0.269793  | 6.43473     | 1.69044E-10 |
| <b>Atp8a1</b>        | 23.3218 | 0.338123  | 6.10799     | 4.91865E-13 |
| <b>Cnrip1</b>        | 23.2407 | 0.628005  | 5.20973     | 0.00327376  |
| <b>Csdc2</b>         | 23.133  | 0.576886  | 5.32552     | 1.59156E-10 |
| <b>Dgkb</b>          | 23.0722 | 0.211405  | 6.77        | 6.34028E-11 |
| <b>C1ql3</b>         | 23.0256 | 0         | 1.7977E+308 | 0           |
| <b>Prickle2</b>      | 22.873  | 0.498759  | 5.51916     | 0           |
| <b>Lhx2</b>          | 22.8693 | 0         | 1.7977E+308 | 0           |
| <b>Slc30a3</b>       | 22.8094 | 0         | 1.7977E+308 | 0           |
| <b>Ptbp2</b>         | 22.704  | 1.41672   | 4.00233     | 0           |
| <b>Cntnap2</b>       | 22.6841 | 0.208537  | 6.76523     | 3.95629E-05 |
| <b>Kcnj4</b>         | 22.6587 | 0         | 1.7977E+308 | 0           |
| <b>Rragb</b>         | 22.6373 | 0.8559    | 4.72511     | 1.60742E-10 |
| <b>Slco1c1</b>       | 22.6101 | 0         | 1.7977E+308 | 0           |
| <b>Fndc5</b>         | 22.4924 | 0.468526  | 5.58517     | 8.5118E-10  |
| <b>Clvs2</b>         | 22.4443 | 0         | 1.7977E+308 | 3.49022E-22 |
| <b>Ddx25</b>         | 22.3995 | 0.29856   | 6.22931     | 0.000119534 |
| <b>Dnajc27</b>       | 22.3883 | 0.473628  | 5.56285     | 1.93284E-12 |
| <b>Igfbp2</b>        | 22.3521 | 0         | 1.7977E+308 | 0           |
| <b>Arxes2</b>        | 22.346  | 1.02701   | 4.4435      | 3.73242E-06 |
| <b>Usp11</b>         | 22.3212 | 0.398929  | 5.80614     | 1.55055E-12 |
| <b>Mtap6</b>         | 22.273  | 0.55807   | 5.3187      | 7.08976E-11 |
| <b>Srgap3</b>        | 22.0611 | 0.936859  | 4.55753     | 0           |
| <b>E130012A19Rik</b> | 21.9821 | 0         | 1.7977E+308 | 0           |
| <b>Nr2f1</b>         | 21.9509 | 0.961966  | 4.51215     | 0.013515    |
| <b>Syt12</b>         | 21.8986 | 0.348763  | 5.97245     | 7.99152E-11 |
| <b>Aqp4</b>          | 21.8579 | 0         | 1.7977E+308 | 0           |
| <b>Icam5</b>         | 21.792  | 0         | 1.7977E+308 | 0           |
| <b>Cntnap1</b>       | 21.6383 | 0.543701  | 5.31463     | 0.00893257  |

|               |         |           |             |             |
|---------------|---------|-----------|-------------|-------------|
| Dio2          | 21.4658 | 0.12292   | 7.44818     | 6.77417E-10 |
| Dzip3         | 21.4615 | 1.27195   | 4.07664     | 8.9103E-08  |
| Shank1        | 21.3923 | 0.632377  | 5.08016     | 0           |
| Gpr158        | 21.2569 | 0.0940691 | 7.81999     | 4.74525E-10 |
| Rtn4r         | 21.2565 | 0.597971  | 5.15168     | 1.51037E-08 |
| Necab1        | 21.2426 | 0.0440901 | 8.91229     | 0.000214326 |
| Ddah1         | 21.0683 | 0.632227  | 5.05849     | 7.78953E-09 |
| B230217C12Rik | 20.9301 | 0         | 1.7977E+308 | 0           |
| Prvt1         | 20.9209 | 0         | 1.7977E+308 | 0           |
| Ano3          | 20.9056 | 0.197292  | 6.72741     | 0.000335566 |
| Egr3          | 20.7574 | 0         | 1.7977E+308 | 0           |
| Gprc5b        | 20.7163 | 1.27656   | 4.02044     | 0           |
| Kcnip3        | 20.6466 | 0.622921  | 5.05071     | 5.38139E-06 |
| Tbr1          | 20.4591 | 0.739016  | 4.79099     | 0.00379089  |
| Gm9851        | 20.4175 | 1.20716   | 4.08012     | 8.74174E-13 |
| Gfra2         | 20.377  | 0.550305  | 5.21057     | 0.000617247 |
| Pcdh9         | 20.3755 | 0.533754  | 5.25451     | 0.00382008  |
| Gfod1         | 20.3731 | 0.932231  | 4.44983     | 0           |
| Dab1          | 20.3705 | 0.678732  | 4.90749     | 0.000075098 |
| Shf           | 20.3567 | 0.441262  | 5.52772     | 0.000347824 |
| Grm3          | 20.3432 | 0         | 1.7977E+308 | 0           |
| Mtss1l        | 20.324  | 0.834184  | 4.60668     | 0.000171429 |
| BC018242      | 20.3068 | 0.393504  | 5.68944     | 1.63794E-08 |
| Kcnh3         | 20.2503 | 0.132869  | 7.25179     | 0.000232935 |
| Cldn5         | 20.2414 | 0.78512   | 4.68825     | 4.23206E-06 |
| Pdlim7        | 20.1979 | 0.942864  | 4.42101     | 1.70315E-07 |
| Cacna2d3      | 20.1772 | 0         | 1.7977E+308 | 0           |
| Slco1a4       | 20.1386 | 0.292608  | 6.10485     | 3.68049E-06 |
| Lrrc4         | 20.1167 | 0.109001  | 7.52791     | 5.64985E-05 |
| Gad2          | 20.0891 | 0         | 1.7977E+308 | 0           |
| Tmem198       | 19.9915 | 0         | 1.7977E+308 | 0           |
| Ogdhl         | 19.9646 | 0.271066  | 6.20265     | 3.24537E-08 |
| Add2          | 19.8724 | 0         | 1.7977E+308 | 0           |
| Mtmr7         | 19.8466 | 0.783239  | 4.6633      | 1.64384E-12 |
| Gm17321       | 19.7895 | 0.729188  | 4.7623      | 2.932E-14   |
| Sez6          | 19.7534 | 0.746044  | 4.7267      | 0.0129504   |
| Abcd2         | 19.7399 | 0.879418  | 4.48842     | 1.7311E-06  |
| Cnr1          | 19.7342 | 0.0341386 | 9.17508     | 0.000601374 |
| Elovl4        | 19.6565 | 0.0932715 | 7.71936     | 1.43638E-05 |
| St8sia5       | 19.6386 | 0.331002  | 5.89071     | 0.000882707 |
| SNORA71       | 19.6295 | 0         | 1.7977E+308 | 0.0234434   |
| Fam84a        | 19.6086 | 0.546337  | 5.16555     | 2.68432E-14 |
| Ttll11        | 19.598  | 0         | 1.7977E+308 | 0           |
| Astn1         | 19.5857 | 0.0975813 | 7.64898     | 1.74049E-05 |
| Gprin1        | 19.5398 | 0.244861  | 6.31831     | 8.39273E-09 |
| Rprml         | 19.5194 | 0         | 1.7977E+308 | 0           |

|                      |         |           |             |             |
|----------------------|---------|-----------|-------------|-------------|
| <b>Bcl11a</b>        | 19.4522 | 1.00798   | 4.27039     | 4.73216E-08 |
| <b>Hcn2</b>          | 19.4455 | 0.225563  | 6.42976     | 1.48298E-05 |
| <b>Rasl11b</b>       | 19.4346 | 0.826213  | 4.55597     | 5.69563E-08 |
| <b>Rab2b</b>         | 19.4283 | 0.859586  | 4.49838     | 1.00907E-07 |
| <b>A830018L16Rik</b> | 19.3816 | 0.236069  | 6.35934     | 0.0072705   |
| <b>Tmem44</b>        | 19.3737 | 0.635164  | 4.93083     | 2.09756E-06 |
| <b>Rasl10a</b>       | 19.3358 | 0.891552  | 4.43881     | 0.00744906  |
| <b>Zmat4</b>         | 19.1288 | 0         | 1.7977E+308 | 2.69096E-26 |
| <b>Nebi</b>          | 19.1078 | 0.272337  | 6.13263     | 0           |
| <b>Kcnc1</b>         | 19.0939 | 0.0722694 | 8.04551     | 0.00294024  |
| <b>Fkbp1b</b>        | 19.0594 | 0.565369  | 5.07516     | 0.0020585   |
| <b>Nrsn2</b>         | 19.0488 | 0         | 1.7977E+308 | 0           |
| <b>Ccdc106</b>       | 19.0373 | 0.376223  | 5.6611      | 0.000234084 |
| <b>Fam5b</b>         | 19.0313 | 0         | 1.7977E+308 | 0           |
| <b>Tro</b>           | 19.0215 | 0.0763932 | 7.95997     | 3.85476E-05 |
| <b>Myt1l</b>         | 19.0206 | 1.1431    | 4.05653     | 0           |
| <b>Crym</b>          | 18.959  | 0.224959  | 6.39707     | 0.000391307 |
| <b>Hdgfrp3</b>       | 18.906  | 0.602042  | 4.97284     | 0           |
| <b>SNORA48</b>       | 18.899  | 0         | 1.7977E+308 | 0.00895144  |
| <b>Ppp1r16b</b>      | 18.8854 | 0.626425  | 4.91399     | 0           |
| <b>Adam23</b>        | 18.8385 | 0.687145  | 4.77692     | 7.19684E-13 |
| <b>Chst10</b>        | 18.8192 | 0.0912875 | 7.68757     | 1.56569E-05 |
| <b>Elavl3</b>        | 18.7455 | 0.0822756 | 7.83186     | 7.9099E-06  |
| <b>Ppp1r3c</b>       | 18.671  | 0.75734   | 4.62371     | 2.48205E-12 |
| <b>Lgi3</b>          | 18.5712 | 0.182265  | 6.67089     | 1.51684E-07 |
| <b>Ahi1</b>          | 18.5314 | 1.09339   | 4.08309     | 0.000101138 |
| <b>Bhlhb9</b>        | 18.5163 | 1.03964   | 4.15464     | 1.76758E-05 |
| <b>Rasgef1b</b>      | 18.4831 | 0.815633  | 4.50214     | 3.53817E-12 |
| <b>Gnal</b>          | 18.2483 | 0.733646  | 4.63653     | 0           |
| <b>Csrnp3</b>        | 18.2477 | 0.176539  | 6.69158     | 0           |
| <b>Rasd2</b>         | 18.2165 | 0         | 1.7977E+308 | 0           |
| <b>Snx32</b>         | 18.1223 | 0.676743  | 4.74301     | 2.57542E-06 |
| <b>Kcna1</b>         | 18.1105 | 0.185755  | 6.60728     | 0           |
| <b>Gpr22</b>         | 18.0374 | 0.0431881 | 8.70614     | 0.0242776   |
| <b>Disp2</b>         | 17.964  | 0.591195  | 4.92533     | 0           |
| <b>Fabp7</b>         | 17.9436 | 0         | 1.7977E+308 | 0           |
| <b>Fhl2</b>          | 17.7769 | 0.239068  | 6.21644     | 0.00449957  |
| <b>Tmeff2</b>        | 17.7402 | 0.474498  | 5.22448     | 4.51411E-13 |
| <b>Lrfn5</b>         | 17.6996 | 0.548478  | 5.01214     | 1.57258E-13 |
| <b>Ctnnd2</b>        | 17.6785 | 0.196451  | 6.49168     | 1.48203E-11 |
| <b>Mtap9</b>         | 17.653  | 0.331033  | 5.7368      | 0           |
| <b>Lrrtm2</b>        | 17.6382 | 0.0850022 | 7.69699     | 2.09842E-07 |
| <b>Mgat3</b>         | 17.62   | 0.219753  | 6.32519     | 1.88228E-10 |
| <b>Cdh2</b>          | 17.5461 | 0.664486  | 4.72277     | 0           |
| <b>Neto2</b>         | 17.5205 | 0.079784  | 7.77873     | 5.71021E-07 |
| <b>Olig1</b>         | 17.5191 | 0         | 1.7977E+308 | 0           |

|                |         |           |             |             |
|----------------|---------|-----------|-------------|-------------|
| <b>Fut9</b>    | 17.5175 | 0         | 1.7977E+308 | 0           |
| <b>Asphd1</b>  | 17.4612 | 0         | 1.7977E+308 | 2.55153E-46 |
| <b>Ank1</b>    | 17.4411 | 1.0618    | 4.03791     | 0.000113928 |
| <b>Jakmip2</b> | 17.4152 | 0.940825  | 4.21027     | 0.0248117   |
| <b>Bai3</b>    | 17.3377 | 0         | 1.7977E+308 | 0           |
| <b>Morn4</b>   | 17.2982 | 0.743119  | 4.54088     | 8.21392E-07 |
| <b>Nap1l3</b>  | 17.2526 | 0.686729  | 4.65093     | 5.1139E-13  |
| <b>Cacng8</b>  | 17.2025 | 0         | 1.7977E+308 | 3.49456E-42 |
| <b>Bbs4</b>    | 17.1874 | 0.648892  | 4.72723     | 2.71825E-11 |
| <b>Nr4a1</b>   | 17.163  | 0.81264   | 4.40054     | 2.77506E-10 |
| <b>Trpc3</b>   | 17.1585 | 0.126029  | 7.08903     | 1.18932E-05 |
| <b>Timp4</b>   | 17.1097 | 0.35304   | 5.59884     | 0.000702637 |
| <b>Zfp239</b>  | 17.0938 | 0.542975  | 4.97644     | 4.24152E-08 |
| <b>Coch</b>    | 17.0858 | 0.394053  | 5.43826     | 1.50802E-05 |
| <b>5S_rRNA</b> | 17.0215 | 0         | 1.7977E+308 | 0.0368961   |
| <b>Ankrd45</b> | 16.9369 | 0         | 1.7977E+308 | 0           |
| <b>Panx2</b>   | 16.9141 | 0.129787  | 7.02594     | 2.92698E-05 |
| <b>Syngap1</b> | 16.9098 | 0.142659  | 6.88915     | 0.00148034  |
| <b>Galnt1l</b> | 16.8503 | 1.05043   | 4.00373     | 0           |
| <b>Unc13a</b>  | 16.7767 | 0.0840055 | 7.64176     | 2.22706E-09 |
| <b>Ncoa7</b>   | 16.7293 | 0.98353   | 4.08826     | 2.31861E-13 |
| <b>Tub</b>     | 16.7104 | 0         | 1.7977E+308 | 0           |
| <b>Grik5</b>   | 16.6886 | 0.968207  | 4.1074      | 0           |
| <b>Ehd3</b>    | 16.6698 | 0.659273  | 4.66021     | 6.55141E-15 |
| <b>Hey1</b>    | 16.5755 | 0.835947  | 4.3095      | 2.14483E-09 |
| <b>Kcnt1</b>   | 16.5439 | 0         | 1.7977E+308 | 0           |
| <b>Chn2</b>    | 16.5227 | 0.646369  | 4.67595     | 0.000379013 |
| <b>Gm11578</b> | 16.4882 | 0         | 1.7977E+308 | 1.73138E-30 |
| <b>Kcnf1</b>   | 16.4316 | 0         | 1.7977E+308 | 0           |
| <b>Akap6</b>   | 16.3732 | 0         | 1.7977E+308 | 0           |
| <b>snoU109</b> | 16.3441 | 0         | 1.7977E+308 | 0.0315984   |
| <b>Tiam2</b>   | 16.3407 | 0.965588  | 4.08092     | 1.42369E-14 |
| <b>Tubg2</b>   | 16.3199 | 0.733885  | 4.47493     | 1.47061E-07 |
| <b>Camk1g</b>  | 16.288  | 0.582483  | 4.80545     | 9.11304E-09 |
| <b>Lonrf2</b>  | 16.2369 | 0.974419  | 4.05859     | 0           |
| <b>Olfm3</b>   | 16.2295 | 0.118117  | 7.10225     | 0.000162543 |
| <b>Fam163b</b> | 16.1917 | 0         | 1.7977E+308 | 0           |
| <b>Clec2l</b>  | 16.1793 | 0.216891  | 6.22103     | 0.000581096 |
| <b>Slc6a11</b> | 16.1577 | 0         | 1.7977E+308 | 0           |
| <b>Pcdh7</b>   | 16.116  | 0.303257  | 5.73181     | 2.01357E-11 |
| <b>Slc38a1</b> | 16.099  | 0.915698  | 4.13596     | 0           |
| <b>Pcdh10</b>  | 16.0764 | 0         | 1.7977E+308 | 0           |
| <b>Chrm1</b>   | 15.9855 | 0.20908   | 6.25656     | 6.92996E-14 |
| <b>Kcnj9</b>   | 15.9255 | 0.0866783 | 7.52145     | 2.44207E-05 |
| <b>Gm11549</b> | 15.7419 | 0         | 1.7977E+308 | 0           |
| <b>Gucy1a3</b> | 15.6736 | 0.620141  | 4.65959     | 0           |

|                      |         |           |             |             |
|----------------------|---------|-----------|-------------|-------------|
| <b>Eif5a2</b>        | 15.5686 | 0.409513  | 5.24858     | 1.33718E-15 |
| <b>Rims2</b>         | 15.5153 | 0.574365  | 4.75558     | 1.16805E-14 |
| <b>Krt222</b>        | 15.5081 | 0         | 1.7977E+308 | 0           |
| <b>Gabra5</b>        | 15.5015 | 0         | 1.7977E+308 | 0           |
| <b>9330182L06Rik</b> | 15.4494 | 0.88451   | 4.12653     | 0.000302661 |
| <b>Sh2d5</b>         | 15.407  | 0.132932  | 6.85675     | 0.000496356 |
| <b>Nefh</b>          | 15.4003 | 0.289607  | 5.73272     | 3.47116E-07 |
| <b>Kcnd2</b>         | 15.3656 | 0.376696  | 5.35016     | 0           |
| <b>Fam19a1</b>       | 15.3269 | 0         | 1.7977E+308 | 0           |
| <b>Fam169a</b>       | 15.2713 | 0.205185  | 6.21776     | 9.4143E-09  |
| <b>Chl1</b>          | 15.1679 | 0.120262  | 6.97869     | 6.77758E-06 |
| <b>Sytl2</b>         | 15.0919 | 0.246912  | 5.93363     | 9.28876E-08 |
| <b>Prune2</b>        | 15.042  | 0.871975  | 4.10856     | 2.55644E-08 |
| <b>Cckbr</b>         | 15.0386 | 0.760772  | 4.30507     | 3.07163E-10 |
| <b>Ncan</b>          | 14.9795 | 0         | 1.7977E+308 | 0           |
| <b>Creg2</b>         | 14.9004 | 0.0786456 | 7.56577     | 2.18904E-06 |
| <b>Mgat5b</b>        | 14.8885 | 0         | 1.7977E+308 | 0           |
| <b>Unc80</b>         | 14.7563 | 0.212084  | 6.12055     | 0.00196594  |
| <b>1700091E21Rik</b> | 14.7048 | 0         | 1.7977E+308 | 3.58517E-23 |
| <b>Mark1</b>         | 14.6511 | 0.224911  | 6.02551     | 9.12535E-10 |
| <b>Rab33a</b>        | 14.5055 | 0         | 1.7977E+308 | 0           |
| <b>Id4</b>           | 14.4592 | 0.372043  | 5.28037     | 4.24674E-05 |
| <b>Rasgef1c</b>      | 14.3936 | 0         | 1.7977E+308 | 0           |
| <b>Hs3st2</b>        | 14.3921 | 0.280439  | 5.68144     | 0.00181468  |
| <b>Rgs17</b>         | 14.3893 | 0.190999  | 6.2353      | 0.0200701   |
| <b>Ypel4</b>         | 14.3472 | 0.31636   | 5.50306     | 0.0058049   |
| <b>Sidt1</b>         | 14.3225 | 0.0864607 | 7.37203     | 0.000189194 |
| <b>2310046A06Rik</b> | 14.3007 | 0         | 1.7977E+308 | 0           |
| <b>Lrp3</b>          | 14.2868 | 0.537144  | 4.73323     | 9.59725E-12 |
| <b>Lrrn3</b>         | 14.1489 | 0.129613  | 6.77033     | 0.000194634 |
| <b>Nlgn1</b>         | 14.1426 | 0         | 1.7977E+308 | 0           |
| <b>Dnm3</b>          | 14.1394 | 0.0849039 | 7.37968     | 3.60944E-08 |
| <b>Sez6l</b>         | 14.0691 | 0.426565  | 5.04362     | 0           |
| <b>Zkscan4</b>       | 14.042  | 0.461365  | 4.9277      | 0.000551462 |
| <b>Rgs14</b>         | 14.034  | 0         | 1.7977E+308 | 0           |
| <b>Lmtk3</b>         | 13.896  | 0         | 1.7977E+308 | 0           |
| <b>Ptprz1</b>        | 13.8599 | 0.0670321 | 7.69185     | 1.55342E-09 |
| <b>Nipa1</b>         | 13.8459 | 0.543419  | 4.67125     | 1.586E-10   |
| <b>3110047P20Rik</b> | 13.802  | 0         | 1.7977E+308 | 2.90596E-05 |
| <b>1600021P15Rik</b> | 13.7876 | 0.323862  | 5.41185     | 7.31313E-08 |
| <b>Sh3gl3</b>        | 13.7835 | 0         | 1.7977E+308 | 0           |
| <b>Kcnq5</b>         | 13.6898 | 0.743343  | 4.20293     | 0           |
| <b>Ncam2</b>         | 13.6016 | 0.237082  | 5.84224     | 7.11119E-06 |
| <b>Lin7a</b>         | 13.6003 | 0.225333  | 5.91544     | 1.08999E-10 |
| <b>1700054N08Rik</b> | 13.5946 | 0.569805  | 4.57643     | 1.53579E-07 |
| <b>Cit</b>           | 13.4686 | 0.11427   | 6.88102     | 1.01613E-05 |

|                      |         |           |             |             |
|----------------------|---------|-----------|-------------|-------------|
| <b>Gpr88</b>         | 13.4074 | 0.270982  | 5.62868     | 6.07769E-07 |
| <b>Scn8a</b>         | 13.3988 | 0         | 1.7977E+308 | 0           |
| <b>Kcnma1</b>        | 13.3724 | 0.775078  | 4.10878     | 0.000657109 |
| <b>Slitrk1</b>       | 13.3491 | 0.0657196 | 7.66621     | 1.65982E-05 |
| <b>Fbxl2</b>         | 13.3448 | 0.654627  | 4.34946     | 2.99531E-13 |
| <b>Cpt1c</b>         | 13.3431 | 0.610949  | 4.4489      | 6.91272E-09 |
| <b>Neto1</b>         | 13.2745 | 0.0798863 | 7.3765      | 3.57679E-05 |
| <b>Accn1</b>         | 13.2479 | 0.276699  | 5.5813      | 5.34842E-06 |
| <b>Scn3b</b>         | 13.1374 | 0.330333  | 5.31362     | 4.98867E-09 |
| <b>Hs3st4</b>        | 13.1105 | 0         | 1.7977E+308 | 0           |
| <b>Pdyn</b>          | 13.0787 | 0.448873  | 4.86477     | 1.48482E-06 |
| <b>Lrtm2</b>         | 13.0398 | 0         | 1.7977E+308 | 0           |
| <b>Inf2</b>          | 13.0324 | 0.349906  | 5.21899     | 1.26525E-11 |
| <b>Kcnc2</b>         | 13.0076 | 0.0734382 | 7.46861     | 3.00948E-06 |
| <b>Tmem229a</b>      | 13.0042 | 0.613408  | 4.40599     | 0           |
| <b>Mboat2</b>        | 13.0024 | 0.351436  | 5.20937     | 3.78589E-05 |
| <b>Wasf3</b>         | 12.9961 | 0.644706  | 4.33329     | 0.0373374   |
| <b>Slc4a4</b>        | 12.9501 | 0.253295  | 5.676       | 9.05124E-11 |
| <b>Grm7</b>          | 12.9456 | 0         | 1.7977E+308 | 3.57778E-32 |
| <b>Nlgn3</b>         | 12.9312 | 0.0253908 | 8.99234     | 0.0170463   |
| <b>Hrh3</b>          | 12.8599 | 0.422646  | 4.92729     | 0.0173305   |
| <b>Tmem158</b>       | 12.826  | 0.425386  | 4.91415     | 0.000183724 |
| <b>Ache</b>          | 12.8112 | 0.222816  | 5.84541     | 0.00352577  |
| <b>Hepacam</b>       | 12.8057 | 0.0404754 | 8.30553     | 0.0487719   |
| <b>Slc32a1</b>       | 12.7637 | 0         | 1.7977E+308 | 0           |
| <b>Pich2</b>         | 12.754  | 0         | 1.7977E+308 | 0           |
| <b>Ankrd33b</b>      | 12.6859 | 0.197532  | 6.005       | 2.56838E-08 |
| <b>Mapk11</b>        | 12.6424 | 0.320821  | 5.30036     | 0.000171819 |
| <b>Fam189a1</b>      | 12.6172 | 0.0386224 | 8.35173     | 0.0234412   |
| <b>Arhgap33</b>      | 12.512  | 0.10792   | 6.8572      | 0.000544638 |
| <b>Arxes1</b>        | 12.4641 | 0.718009  | 4.11763     | 0.00111871  |
| <b>Tmem151b</b>      | 12.4431 | 0         | 1.7977E+308 | 0           |
| <b>Cyp2j9</b>        | 12.4357 | 0.530244  | 4.55168     | 0.000313616 |
| <b>Rimklb</b>        | 12.4263 | 0         | 1.7977E+308 | 7.27852E-29 |
| <b>D430041D05Rik</b> | 12.3939 | 0.0418261 | 8.21101     | 4.58294E-05 |
| <b>Bsn</b>           | 12.1857 | 0.0834174 | 7.19062     | 2.04661E-08 |
| <b>Nalcn</b>         | 12.1783 | 0.668765  | 4.18667     | 0           |
| <b>Hrasls</b>        | 12.1703 | 0         | 1.7977E+308 | 3.1925E-37  |
| <b>Rhbdl1</b>        | 12.1438 | 0.511684  | 4.56882     | 0.000197378 |
| <b>Arhgef17</b>      | 12.0873 | 0.517387  | 4.54611     | 0           |
| <b>Pknox2</b>        | 12.0706 | 0.395422  | 4.93196     | 1.38115E-07 |
| <b>Foxg1</b>         | 12.0485 | 0.160947  | 6.22613     | 0.00012031  |
| <b>BC005764</b>      | 11.9822 | 0.512596  | 4.54693     | 0.00998388  |
| <b>Reln</b>          | 11.9785 | 0.377301  | 4.98858     | 0           |
| <b>Ugt8a</b>         | 11.9662 | 0.193844  | 5.94792     | 3.06359E-06 |
| <b>Phospho1</b>      | 11.9458 | 0.365295  | 5.0313      | 0.000269943 |

|                      |         |           |             |             |
|----------------------|---------|-----------|-------------|-------------|
| <b>Fam13c</b>        | 11.9182 | 0.737148  | 4.01506     | 8.02821E-11 |
| <b>Fam155a</b>       | 11.9078 | 0.344751  | 5.11021     | 0.00547122  |
| <b>Slc4a8</b>        | 11.9067 | 0.102981  | 6.85326     | 1.92626E-05 |
| <b>Frzb</b>          | 11.8681 | 0.684463  | 4.11597     | 0.0135194   |
| <b>1700058G18Rik</b> | 11.7447 | 0         | 1.7977E+308 | 6.11062E-40 |
| <b>Pak7</b>          | 11.7346 | 0         | 1.7977E+308 | 0           |
| <b>Ppfia2</b>        | 11.7273 | 0         | 1.7977E+308 | 0           |
| <b>Fos</b>           | 11.7038 | 0.384378  | 4.92831     | 0.0422852   |
| <b>Atp2b3</b>        | 11.6931 | 0         | 1.7977E+308 | 0           |
| <b>Fam5c</b>         | 11.6854 | 0         | 1.7977E+308 | 0           |
| <b>Tram111</b>       | 11.6739 | 0.21757   | 5.74566     | 0.000421844 |
| <b>Sema6b</b>        | 11.6735 | 0.554979  | 4.39466     | 3.76165E-10 |
| <b>Gm16740</b>       | 11.6063 | 0.437455  | 4.72963     | 0.0342078   |
| <b>A830036E02Rik</b> | 11.5746 | 0         | 1.7977E+308 | 1.80338E-32 |
| <b>Doc2a</b>         | 11.5502 | 0.063801  | 7.50012     | 0.0316362   |
| <b>Kcnb1</b>         | 11.5249 | 0.0947661 | 6.92617     | 0.00123375  |
| <b>Crtac1</b>        | 11.4586 | 0.569581  | 4.33039     | 6.80966E-06 |
| <b>Tspyl5</b>        | 11.4397 | 0.333337  | 5.10093     | 1.61382E-09 |
| <b>Fgf14</b>         | 11.4263 | 0.470052  | 4.60339     | 4.39085E-08 |
| <b>Kcnn2</b>         | 11.4162 | 0         | 1.7977E+308 | 0           |
| <b>Ajap1</b>         | 11.4038 | 0.153593  | 6.21426     | 0.00012658  |
| <b>Cdh10</b>         | 11.3445 | 0         | 1.7977E+308 | 0           |
| <b>Cnnm1</b>         | 11.3349 | 0.528646  | 4.42233     | 2.31396E-08 |
| <b>Fsd1</b>          | 11.3153 | 0         | 1.7977E+308 | 0           |
| <b>Clcn6</b>         | 11.298  | 0.611399  | 4.20781     | 3.55634E-13 |
| <b>Rltpr</b>         | 11.2793 | 0.195623  | 5.84946     | 0.000174476 |
| <b>Gpc5</b>          | 11.2786 | 0.281434  | 5.32464     | 3.58792E-05 |
| <b>Clstn2</b>        | 11.194  | 0         | 1.7977E+308 | 0           |
| <b>6330503K22Rik</b> | 11.1794 | 0.649751  | 4.10481     | 6.36783E-08 |
| <b>Lrrn2</b>         | 11.1391 | 0.40599   | 4.77805     | 5.94193E-09 |
| <b>E2f3</b>          | 11.0936 | 0.506384  | 4.45335     | 1.28033E-10 |
| <b>Dbpht2</b>        | 11.0757 | 0.375402  | 4.88281     | 9.49373E-08 |
| <b>Tmem132b</b>      | 11.0502 | 0.273692  | 5.33538     | 0.0011368   |
| <b>Tmem25</b>        | 11.0043 | 0.221066  | 5.63744     | 0.00805445  |
| <b>Kcnc4</b>         | 10.9849 | 0         | 1.7977E+308 | 0           |
| <b>Lzts1</b>         | 10.9458 | 0         | 1.7977E+308 | 0           |
| <b>C130071C03Rik</b> | 10.9271 | 0         | 1.7977E+308 | 0           |
| <b>Cthrc1</b>        | 10.8764 | 0         | 1.7977E+308 | 9.37452E-25 |
| <b>Nav3</b>          | 10.8469 | 0.0671796 | 7.33504     | 7.49569E-06 |
| <b>Cx3cr1</b>        | 10.8421 | 0.307818  | 5.13842     | 9.9627E-09  |
| <b>Gpr26</b>         | 10.8252 | 0         | 1.7977E+308 | 0           |
| <b>Nkain2</b>        | 10.7915 | 0         | 1.7977E+308 | 3.59322E-12 |
| <b>Tmem22</b>        | 10.7587 | 0.472246  | 4.50983     | 0.000652335 |
| <b>Cacna1i</b>       | 10.722  | 0.314111  | 5.09316     | 3.96768E-15 |
| <b>Dcaf12l1</b>      | 10.7121 | 0.36235   | 4.88571     | 4.97317E-08 |
| <b>Kbtbd11</b>       | 10.6391 | 0.305261  | 5.12319     | 0           |



|                      |         |           |             |             |
|----------------------|---------|-----------|-------------|-------------|
| <b>Aspa</b>          | 10.6369 | 0.551389  | 4.26986     | 0.000218617 |
| <b>Mfap3l</b>        | 10.6241 | 0.280412  | 5.24365     | 0.000744277 |
| <b>Hipk4</b>         | 10.604  | 0.199274  | 5.73371     | 0.00292136  |
| <b>Dlx1</b>          | 10.5678 | 0.0608384 | 7.44047     | 0.00433341  |
| <b>Kcnh7</b>         | 10.5153 | 0.187951  | 5.80599     | 0           |
| <b>D130043K22Rik</b> | 10.5147 | 0         | 1.7977E+308 | 4.82945E-20 |
| <b>B230217C12Rik</b> | 10.4889 | 0         | 1.7977E+308 | 0           |
| <b>Map6d1</b>        | 10.485  | 0         | 1.7977E+308 | 0           |
| <b>Pou3f3</b>        | 10.3696 | 0.0929781 | 6.80126     | 0.000151856 |
| <b>Spnb1</b>         | 10.3343 | 0.0881641 | 6.87303     | 1.1488E-10  |
| <b>Maneal</b>        | 10.2914 | 0.149017  | 6.10981     | 0.00115403  |
| <b>Kcna2</b>         | 10.286  | 0.100069  | 6.68355     | 0.0021054   |
| <b>4833424O15Rik</b> | 10.2813 | 0         | 1.7977E+308 | 0           |
| <b>Vwa5b2</b>        | 10.2548 | 0.3059    | 5.06709     | 2.88878E-06 |
| <b>Nkain1</b>        | 10.2081 | 0.374452  | 4.76879     | 0.000028985 |
| <b>Abcg4</b>         | 10.2058 | 0.125271  | 6.3482      | 0.00370123  |
| <b>Crhbp</b>         | 10.1825 | 0         | 1.7977E+308 | 0           |
| <b>Itih3</b>         | 10.1791 | 0.140059  | 6.18343     | 0.000636328 |
| <b>Shc3</b>          | 10.153  | 0         | 1.7977E+308 | 0           |
| <b>RP23-300L8.1</b>  | 10.0792 | 0         | 1.7977E+308 | 2.97443E-15 |
| <b>Magi2</b>         | 10.0465 | 0.0419972 | 7.90218     | 8.64274E-06 |
| <b>Rnf32</b>         | 10.0437 | 0.216251  | 5.53744     | 0.0310052   |
| <b>Bhlhe22</b>       | 10.0124 | 0.21831   | 5.51926     | 0.000022621 |
| <b>Cdr1</b>          | 9.99965 | 0.125939  | 6.31108     | 0.000475971 |
| <b>Gm5151</b>        | 9.98173 | 0         | 1.7977E+308 | 0           |
| <b>Stxbp5l</b>       | 9.88863 | 0         | 1.7977E+308 | 0           |
| <b>B3galt2</b>       | 9.87421 | 0.192038  | 5.6842      | 1.76365E-10 |
| <b>Lrrtm1</b>        | 9.87389 | 0         | 1.7977E+308 | 0           |
| <b>9330159F19Rik</b> | 9.87315 | 0.129931  | 6.24769     | 1.29466E-07 |
| <b>Rhof</b>          | 9.86322 | 0.367488  | 4.74629     | 3.34445E-11 |
| <b>Kndc1</b>         | 9.85292 | 0.0736494 | 7.06374     | 0.00506758  |
| <b>Fhod3</b>         | 9.78512 | 0.112834  | 6.43831     | 0.000198018 |
| <b>Tnnc1</b>         | 9.77969 | 0         | 1.7977E+308 | 7.97492E-16 |
| <b>Slc6a15</b>       | 9.71714 | 0.372572  | 4.70494     | 3.03773E-08 |
| <b>Igsf21</b>        | 9.71515 | 0         | 1.7977E+308 | 0           |
| <b>Cacna1b</b>       | 9.70446 | 0         | 1.7977E+308 | 8.24424E-17 |
| <b>Mas1</b>          | 9.67668 | 0.564552  | 4.09933     | 0.0134204   |
| <b>Fam19a2</b>       | 9.67606 | 0.0676064 | 7.16111     | 6.24246E-05 |
| <b>Nxph1</b>         | 9.67255 | 0.257448  | 5.23154     | 0.00189373  |
| <b>Slc6a7</b>        | 9.62337 | 0         | 1.7977E+308 | 0           |
| <b>Dpysl4</b>        | 9.60125 | 0.305984  | 4.9717      | 1.35876E-05 |
| <b>Slc35f1</b>       | 9.58156 | 0.1607    | 5.89781     | 1.19191E-07 |
| <b>Gng2-ps1</b>      | 9.55551 | 0         | 1.7977E+308 | 0.000277637 |
| <b>6330407J23Rik</b> | 9.52809 | 0         | 1.7977E+308 | 0           |
| <b>A930011O12Rik</b> | 9.50406 | 0         | 1.7977E+308 | 0           |
| <b>Specc1</b>        | 9.48211 | 0.442443  | 4.42165     | 0           |

|                      |         |           |             |             |
|----------------------|---------|-----------|-------------|-------------|
| <b>Tac2</b>          | 9.45042 | 0         | 1.7977E+308 | 1.55984E-31 |
| <b>Gpr123</b>        | 9.44477 | 0         | 1.7977E+308 | 5.57918E-26 |
| <b>Cabyr</b>         | 9.40285 | 0.481518  | 4.28744     | 0.00123731  |
| <b>Cntn4</b>         | 9.36472 | 0.0884346 | 6.72648     | 0.000711858 |
| <b>B3galt1</b>       | 9.3522  | 0.34414   | 4.76424     | 0.000206285 |
| <b>Cacng2</b>        | 9.26541 | 0.0472747 | 7.61464     | 0.0087464   |
| <b>Spnb4</b>         | 9.25176 | 0.258761  | 5.16004     | 8.69677E-11 |
| <b>Pcyt1b</b>        | 9.23452 | 0.271972  | 5.08551     | 5.59765E-08 |
| <b>Rimbp2</b>        | 9.13909 | 0.134333  | 6.08817     | 9.61834E-05 |
| <b>Nme5</b>          | 9.10852 | 0         | 1.7977E+308 | 8.46387E-22 |
| <b>Celf3</b>         | 9.10577 | 0.374632  | 4.60324     | 6.46637E-06 |
| <b>Slitrk5</b>       | 8.95119 | 0.221251  | 5.33832     | 0.000205902 |
| <b>Dok5</b>          | 8.92234 | 0         | 1.7977E+308 | 0           |
| <b>Tmem145</b>       | 8.89213 | 0         | 1.7977E+308 | 0           |
| <b>Accn2</b>         | 8.88738 | 0.263378  | 5.07655     | 0.000237425 |
| <b>Dok6</b>          | 8.87461 | 0         | 1.7977E+308 | 0           |
| <b>Sox5</b>          | 8.83207 | 0.547433  | 4.012       | 1.61745E-06 |
| <b>Cbln4</b>         | 8.82256 | 0.0984842 | 6.48516     | 0.000320028 |
| <b>Cdh18</b>         | 8.81339 | 0         | 1.7977E+308 | 0           |
| <b>Adra1d</b>        | 8.70273 | 0         | 1.7977E+308 | 0           |
| <b>Fbxo41</b>        | 8.69476 | 0         | 1.7977E+308 | 0           |
| <b>Slc45a1</b>       | 8.63906 | 0.319673  | 4.75621     | 0.000150545 |
| <b>Slitrk3</b>       | 8.62744 | 0         | 1.7977E+308 | 0           |
| <b>AI836003</b>      | 8.62531 | 0         | 1.7977E+308 | 0           |
| <b>Dennd5b</b>       | 8.60326 | 0.241207  | 5.15654     | 0           |
| <b>Kcnj16</b>        | 8.58485 | 0         | 1.7977E+308 | 3.75445E-25 |
| <b>9130024F11Rik</b> | 8.56178 | 0         | 1.7977E+308 | 0           |
| <b>Ntrk3</b>         | 8.53902 | 0.0858394 | 6.63629     | 0.000224634 |
| <b>Nxph3</b>         | 8.50296 | 0         | 1.7977E+308 | 0           |
| <b>Klhl34</b>        | 8.50153 | 0         | 1.7977E+308 | 0           |
| <b>Nrg3</b>          | 8.49049 | 0.0740369 | 6.84146     | 9.54414E-05 |
| <b>Sntg1</b>         | 8.49038 | 0.244174  | 5.11985     | 0.02256     |
| <b>Larp6</b>         | 8.46085 | 0.145462  | 5.86209     | 0.00771606  |
| <b>Lrp8</b>          | 8.44139 | 0.117963  | 6.16107     | 0.000308699 |
| <b>Cdh8</b>          | 8.43628 | 0.231193  | 5.18944     | 0.000448538 |
| <b>2810468N07Rik</b> | 8.42996 | 0.425505  | 4.30828     | 0.0100252   |
| <b>Ptptr</b>         | 8.42954 | 0.263649  | 4.99876     | 1.28599E-08 |
| <b>Sema4f</b>        | 8.4295  | 0.37452   | 4.49233     | 2.77612E-05 |
| <b>Dst</b>           | 8.38966 | 0.514779  | 4.02659     | 0           |
| <b>Zcchc12</b>       | 8.20551 | 0         | 1.7977E+308 | 0           |
| <b>Tac1</b>          | 8.18692 | 0         | 1.7977E+308 | 0           |
| <b>Adcyap1</b>       | 8.17305 | 0         | 1.7977E+308 | 0           |
| <b>Pcnxl2</b>        | 8.15947 | 0.36366   | 4.48781     | 5.08031E-06 |
| <b>Dlgap2</b>        | 8.15446 | 0         | 1.7977E+308 | 0           |
| <b>Adrbk2</b>        | 8.13973 | 0.345862  | 4.55671     | 1.78867E-13 |
| <b>Tcte1</b>         | 8.07872 | 0         | 1.7977E+308 | 0           |

|                      |         |           |             |             |
|----------------------|---------|-----------|-------------|-------------|
| <b>Gpr34</b>         | 8.06904 | 0.197361  | 5.35349     | 0.01322     |
| <b>Fbll1</b>         | 8.03797 | 0         | 1.7977E+308 | 0           |
| <b>St6gal2</b>       | 8.01123 | 0         | 1.7977E+308 | 0           |
| <b>Tmem150b</b>      | 7.99793 | 0         | 1.7977E+308 | 0           |
| <b>Gm14817</b>       | 7.99476 | 0         | 1.7977E+308 | 6.19276E-27 |
| <b>Mfsd2a</b>        | 7.9638  | 0         | 1.7977E+308 | 4.55234E-17 |
| <b>Adcy5</b>         | 7.95876 | 0.231925  | 5.10082     | 3.02999E-09 |
| <b>Tmem88b</b>       | 7.9502  | 0.110123  | 6.1738      | 0.00196433  |
| <b>Ica1l</b>         | 7.93387 | 0.157525  | 5.65438     | 1.06103E-05 |
| <b>Zfp651</b>        | 7.93111 | 0.476573  | 4.05675     | 5.26066E-15 |
| <b>Syt17</b>         | 7.92033 | 0.187805  | 5.39825     | 0.00320131  |
| <b>Tmem63c</b>       | 7.91926 | 0.0997086 | 6.3115      | 0.0249984   |
| <b>Gpr37</b>         | 7.89997 | 0         | 1.7977E+308 | 0           |
| <b>Peli3</b>         | 7.88807 | 0.273278  | 4.85123     | 2.15122E-05 |
| <b>6230409E13Rik</b> | 7.88125 | 0.454858  | 4.11494     | 3.85476E-05 |
| <b>Sox8</b>          | 7.86184 | 0         | 1.7977E+308 | 5.70805E-42 |
| <b>Tuba8</b>         | 7.86123 | 0.42469   | 4.21027     | 2.24106E-05 |
| <b>6430598A04Rik</b> | 7.84895 | 0         | 1.7977E+308 | 0           |
| <b>Pitpnm3</b>       | 7.77444 | 0.170931  | 5.50725     | 4.88316E-08 |
| <b>Kctd16</b>        | 7.76214 | 0         | 1.7977E+308 | 2.3119E-43  |
| <b>Zfr2</b>          | 7.6995  | 0.305448  | 4.65577     | 3.65154E-06 |
| <b>Dlk2</b>          | 7.65282 | 0.176235  | 5.44042     | 0.0438641   |
| <b>Vstm2b</b>        | 7.64662 | 0         | 1.7977E+308 | 7.1543E-46  |
| <b>Trpc1</b>         | 7.64577 | 0.0981181 | 6.284       | 0.0148046   |
| <b>B4galnt4</b>      | 7.63272 | 0.112161  | 6.08855     | 0.00548792  |
| <b>Gm9962</b>        | 7.62942 | 0         | 1.7977E+308 | 6.89069E-09 |
| <b>Clip4</b>         | 7.61769 | 0.176566  | 5.43108     | 0.000241383 |
| <b>Adra1b</b>        | 7.61492 | 0.330758  | 4.52498     | 0.00814883  |
| <b>Bdnf</b>          | 7.53202 | 0.108325  | 6.1196      | 0.000158015 |
| <b>Frs3</b>          | 7.50596 | 0.129067  | 5.86185     | 0.0352144   |
| <b>Epha5</b>         | 7.48324 | 0.156181  | 5.58237     | 1.9766E-06  |
| <b>Kcnt2</b>         | 7.43486 | 0.395882  | 4.23116     | 1.22092E-05 |
| <b>Nudt10</b>        | 7.40099 | 0         | 1.7977E+308 | 0           |
| <b>Itgb8</b>         | 7.39938 | 0.264844  | 4.80419     | 2.18224E-14 |
| <b>Chrdl1</b>        | 7.38817 | 0.262337  | 4.81572     | 1.65112E-05 |
| <b>Nwd1</b>          | 7.27881 | 0         | 1.7977E+308 | 1.77916E-45 |
| <b>Gabrg1</b>        | 7.27299 | 0         | 1.7977E+308 | 0           |
| <b>Caskin1</b>       | 7.27063 | 0.0582801 | 6.96293     | 0.00772546  |
| <b>Gm13601</b>       | 7.2608  | 0         | 1.7977E+308 | 4.36123E-13 |
| <b>BC049635</b>      | 7.24251 | 0         | 1.7977E+308 | 3.73259E-30 |
| <b>Jazf1</b>         | 7.22512 | 0.370974  | 4.28363     | 0.00205543  |
| <b>Hcn1</b>          | 7.22435 | 0.345478  | 4.3862      | 4.74368E-06 |
| <b>Gm10419</b>       | 7.22193 | 0         | 1.7977E+308 | 0           |
| <b>ErbB4</b>         | 7.22121 | 0.288227  | 4.64697     | 0.000115146 |
| <b>Hdac9</b>         | 7.21836 | 0.144491  | 5.64262     | 0.000229311 |
| <b>St6galnac5</b>    | 7.17731 | 0.0696626 | 6.68692     | 0.000293872 |

|                      |         |           |             |             |
|----------------------|---------|-----------|-------------|-------------|
| <b>Slc35f3</b>       | 7.15092 | 0         | 1.7977E+308 | 0           |
| <b>Miat</b>          | 7.14929 | 0.0766066 | 6.54419     | 2.40978E-07 |
| <b>Kirrel3</b>       | 7.1224  | 0.424198  | 4.06955     | 2.31198E-05 |
| <b>Lrrc3b</b>        | 7.10051 | 0         | 1.7977E+308 | 0           |
| <b>Chrm4</b>         | 7.08319 | 0         | 1.7977E+308 | 0           |
| <b>Gpr137c</b>       | 7.07969 | 0         | 1.7977E+308 | 0           |
| <b>B3galt5</b>       | 7.06348 | 0.0537872 | 7.03697     | 0.00607655  |
| <b>Nudt11</b>        | 7.05579 | 0.310543  | 4.50594     | 0.000083531 |
| <b>Drp2</b>          | 7.0108  | 0         | 1.7977E+308 | 0           |
| <b>Brdt</b>          | 6.91636 | 0.42922   | 4.01023     | 0.00896553  |
| <b>Cdh7</b>          | 6.9122  | 0         | 1.7977E+308 | 5.37763E-33 |
| <b>Rps6kl1</b>       | 6.90735 | 0.214704  | 5.00771     | 0.010983    |
| <b>Tmem196</b>       | 6.87376 | 0.274934  | 4.64394     | 0.0124223   |
| <b>Gal3st3</b>       | 6.86192 | 0         | 1.7977E+308 | 0           |
| <b>6030405A18Rik</b> | 6.84016 | 0         | 1.7977E+308 | 0           |
| <b>Otud7a</b>        | 6.83271 | 0.0572397 | 6.8993      | 0.0116382   |
| <b>Npy1r</b>         | 6.82399 | 0.356281  | 4.25953     | 1.92645E-05 |
| <b>Gm17470</b>       | 6.81439 | 0         | 1.7977E+308 | 0           |
| <b>Ankrd6</b>        | 6.80367 | 0.106     | 6.00418     | 0.00271896  |
| <b>3110039M20Rik</b> | 6.80212 | 0         | 1.7977E+308 | 8.90751E-12 |
| <b>Atp6ap1l</b>      | 6.79502 | 0         | 1.7977E+308 | 1.84713E-37 |
| <b>Gjc3</b>          | 6.76679 | 0         | 1.7977E+308 | 0           |
| <b>Trank1</b>        | 6.76347 | 0         | 1.7977E+308 | 0           |
| <b>2400009B08Rik</b> | 6.75159 | 0         | 1.7977E+308 | 3.9465E-10  |
| <b>1110032F04Rik</b> | 6.75073 | 0         | 1.7977E+308 | 0           |
| <b>Nova1</b>         | 6.72547 | 0.159744  | 5.3958      | 1.59609E-09 |
| <b>Pigz</b>          | 6.68698 | 0.164232  | 5.34754     | 0.0174864   |
| <b>Gm9866</b>        | 6.68469 | 0         | 1.7977E+308 | 7.20709E-45 |
| <b>Lrch2</b>         | 6.64115 | 0.332484  | 4.32008     | 0.00210345  |
| <b>Flrt3</b>         | 6.63525 | 0.0882539 | 6.23235     | 0.00351101  |
| <b>Lrfn2</b>         | 6.62904 | 0         | 1.7977E+308 | 1.4013E-45  |
| <b>Hs6st2</b>        | 6.61827 | 0.344964  | 4.26194     | 4.67249E-08 |
| <b>Samd12</b>        | 6.61634 | 0         | 1.7977E+308 | 3.25857E-11 |
| <b>Ephb1</b>         | 6.57279 | 0.164155  | 5.32338     | 2.63356E-06 |
| <b>Cartpt</b>        | 6.56653 | 0         | 1.7977E+308 | 2.38386E-30 |
| <b>Purg</b>          | 6.55771 | 0.275922  | 4.57086     | 0.00597756  |
| <b>Akap5</b>         | 6.55544 | 0.0625932 | 6.71054     | 0.00131272  |
| <b>Syt2</b>          | 6.53409 | 0.0227392 | 8.16666     | 0.0178456   |
| <b>Daam2</b>         | 6.51552 | 0.30793   | 4.40321     | 9.10305E-12 |
| <b>Slc13a3</b>       | 6.48883 | 0.370488  | 4.13046     | 0.00158147  |
| <b>Sacs</b>          | 6.48202 | 0.146784  | 5.46467     | 0           |
| <b>Nanos1</b>        | 6.44824 | 0         | 1.7977E+308 | 0           |
| <b>Zfyve28</b>       | 6.44368 | 0         | 1.7977E+308 | 1.00903E-43 |
| <b>1700003M07Rik</b> | 6.43453 | 0         | 1.7977E+308 | 3.32006E-19 |
| <b>Gm17576</b>       | 6.39074 | 0         | 1.7977E+308 | 0.0217226   |
| <b>Chst11</b>        | 6.38784 | 0.387954  | 4.04137     | 9.95427E-11 |

|                      |         |           |             |             |
|----------------------|---------|-----------|-------------|-------------|
| <b>Kcnq3</b>         | 6.38511 | 0         | 1.7977E+308 | 0           |
| <b>Grin2a</b>        | 6.38025 | 0         | 1.7977E+308 | 0           |
| <b>Grik2</b>         | 6.37913 | 0         | 1.7977E+308 | 0           |
| <b>Plxdc1</b>        | 6.37586 | 0.146469  | 5.44395     | 0.0135439   |
| <b>Fezf2</b>         | 6.36447 | 0         | 1.7977E+308 | 0           |
| <b>Trhde</b>         | 6.36314 | 0.189293  | 5.07105     | 9.18938E-08 |
| <b>Satb2</b>         | 6.36248 | 0.0969014 | 6.03693     | 9.05586E-05 |
| <b>Adrb1</b>         | 6.34583 | 0.332567  | 4.25409     | 0.0001882   |
| <b>Kif17</b>         | 6.32968 | 0         | 1.7977E+308 | 8.59669E-29 |
| <b>Agxt2l1</b>       | 6.32696 | 0         | 1.7977E+308 | 0           |
| <b>2900055J20Rik</b> | 6.30162 | 0         | 1.7977E+308 | 5.3323E-26  |
| <b>Slc35f4</b>       | 6.30055 | 0         | 1.7977E+308 | 0           |
| <b>Slmo1</b>         | 6.27955 | 0         | 1.7977E+308 | 0           |
| <b>Gm11978</b>       | 6.2571  | 0         | 1.7977E+308 | 0.000233283 |
| <b>Gm17524</b>       | 6.23036 | 0.375553  | 4.05223     | 0.0216392   |
| <b>Psd2</b>          | 6.2195  | 0.221823  | 4.80932     | 1.64931E-05 |
| <b>Emx2</b>          | 6.17525 | 0.319115  | 4.27435     | 0.0111925   |
| <b>Ankrd34b</b>      | 6.15676 | 0         | 1.7977E+308 | 0           |
| <b>Ttbk1</b>         | 6.1333  | 0         | 1.7977E+308 | 0           |
| <b>Gm10601</b>       | 6.12405 | 0         | 1.7977E+308 | 1.61953E-30 |
| <b>Gabbr1</b>        | 6.11431 | 0.0646724 | 6.5629      | 0.0169862   |
| <b>Hrh1</b>          | 6.09802 | 0.353855  | 4.10711     | 0.00357709  |
| <b>Hapln1</b>        | 6.05635 | 0.18819   | 5.00818     | 9.07289E-05 |
| <b>Ankrd56</b>       | 6.05342 | 0.324542  | 4.22127     | 5.08031E-06 |
| <b>Scn3a</b>         | 6.04791 | 0         | 1.7977E+308 | 1.03328E-10 |
| <b>Gm13704</b>       | 6.04692 | 0.217806  | 4.79509     | 0.00333489  |
| <b>Htr2a</b>         | 6.04436 | 0         | 1.7977E+308 | 0           |
| <b>Xkr4</b>          | 6.04085 | 0         | 1.7977E+308 | 0           |
| <b>Slc7a14</b>       | 6.01449 | 0.268378  | 4.4861      | 1.5498E-14  |
| <b>Zfp941</b>        | 6.0124  | 0.102704  | 5.87138     | 0.00132405  |
| <b>Efnb3</b>         | 5.9866  | 0.344585  | 4.11881     | 7.40846E-05 |
| <b>Spred3</b>        | 5.94352 | 0         | 1.7977E+308 | 0           |
| <b>Wnk3-ps</b>       | 5.92921 | 0.246517  | 4.58808     | 1.73394E-08 |
| <b>Sema3a</b>        | 5.92465 | 0.113344  | 5.70795     | 0.000490417 |
| <b>Dbn1</b>          | 5.90708 | 0         | 1.7977E+308 | 0           |
| <b>Slc3a1</b>        | 5.89528 | 0.245071  | 4.58829     | 0.000837805 |
| <b>Paqr9</b>         | 5.87402 | 0         | 1.7977E+308 | 0           |
| <b>Kcnj11</b>        | 5.86482 | 0.226663  | 4.69347     | 0.000371435 |
| <b>Gpr17</b>         | 5.85973 | 0.086152  | 6.08781     | 0.000198636 |
| <b>Cacng4</b>        | 5.85961 | 0.255145  | 4.52142     | 0.000170416 |
| <b>Ptchd2</b>        | 5.84091 | 0         | 1.7977E+308 | 5.34567E-12 |
| <b>Aff3</b>          | 5.77926 | 0.185465  | 4.96166     | 1.13249E-06 |
| <b>Car7</b>          | 5.76713 | 0         | 1.7977E+308 | 6.98818E-33 |
| <b>Shd</b>           | 5.68709 | 0         | 1.7977E+308 | 1.17472E-41 |
| <b>Tnr</b>           | 5.67945 | 0.0856386 | 6.05135     | 0.015768    |
| <b>AI854517</b>      | 5.67219 | 0.161871  | 5.13099     | 0.00528171  |

|                      |         |           |             |             |
|----------------------|---------|-----------|-------------|-------------|
| <b>F730043M19Rik</b> | 5.64841 | 0.13046   | 5.43616     | 0.00202594  |
| <b>Krt12</b>         | 5.61616 | 0         | 1.7977E+308 | 6.09793E-45 |
| <b>1700084C01Rik</b> | 5.61387 | 0         | 1.7977E+308 | 1.88962E-43 |
| <b>Rin1</b>          | 5.60919 | 0.319251  | 4.13503     | 1.36293E-06 |
| <b>Tmem121</b>       | 5.58221 | 0         | 1.7977E+308 | 1.39261E-41 |
| <b>Gm13303</b>       | 5.57499 | 0         | 1.7977E+308 | 3.49669E-36 |
| <b>AI504432</b>      | 5.53208 | 0.202557  | 4.77142     | 0.00397038  |
| <b>Lingo2</b>        | 5.4885  | 0         | 1.7977E+308 | 1.9701E-17  |
| <b>Kcnh5</b>         | 5.4746  | 0         | 1.7977E+308 | 0           |
| <b>Dlx6os1</b>       | 5.47055 | 0         | 1.7977E+308 | 3.99307E-20 |
| <b>4930447C04Rik</b> | 5.43155 | 0         | 1.7977E+308 | 7.95364E-18 |
| <b>Dgki</b>          | 5.35383 | 0         | 1.7977E+308 | 6.42718E-34 |
| <b>Slc17a6</b>       | 5.32855 | 0         | 1.7977E+308 | 0           |
| <b>Fmn2</b>          | 5.31544 | 0.203766  | 4.7052      | 8.01242E-07 |
| <b>1700001L19Rik</b> | 5.30999 | 0         | 1.7977E+308 | 1.04802E-43 |
| <b>Rab36</b>         | 5.28942 | 0.284923  | 4.21447     | 0.000296357 |
| <b>Gm16105</b>       | 5.28097 | 0         | 1.7977E+308 | 1.6987E-21  |
| <b>Gm5567</b>        | 5.24441 | 0.315936  | 4.05308     | 0.00185222  |
| <b>Grm8</b>          | 5.24331 | 0.0957468 | 5.77511     | 0.000403349 |
| <b>Zkscan16</b>      | 5.23523 | 0         | 1.7977E+308 | 0           |
| <b>4930429B21Rik</b> | 5.23055 | 0         | 1.7977E+308 | 1.40536E-41 |
| <b>Gucy1a2</b>       | 5.22895 | 0.256537  | 4.34928     | 0.000147675 |
| <b>Wnt7b</b>         | 5.21927 | 0.119831  | 5.44477     | 0.0107358   |
| <b>Rlbp1</b>         | 5.1965  | 0         | 1.7977E+308 | 0           |
| <b>Kcnj6</b>         | 5.18717 | 0         | 1.7977E+308 | 0           |
| <b>Rcor2</b>         | 5.14905 | 0         | 1.7977E+308 | 9.21132E-15 |
| <b>Dusp15</b>        | 5.12331 | 0.144994  | 5.14301     | 0.00190663  |
| <b>Grm2</b>          | 5.11078 | 0.203366  | 4.65139     | 0.000394149 |
| <b>Chrn2</b>         | 5.08971 | 0.14145   | 5.16922     | 5.44136E-06 |
| <b>BC030500</b>      | 5.07576 | 0         | 1.7977E+308 | 2.39764E-22 |
| <b>Gm12281</b>       | 5.06103 | 0         | 1.7977E+308 | 2.68605E-05 |
| <b>Shisa9</b>        | 5.02943 | 0         | 1.7977E+308 | 8.73927E-44 |
| <b>Prss12</b>        | 5.0142  | 0.182948  | 4.77652     | 0.00392856  |
| <b>Enox1</b>         | 4.99204 | 0         | 1.7977E+308 | 0           |
| <b>Gm10598</b>       | 4.98299 | 0         | 1.7977E+308 | 2.33365E-40 |
| <b>Sfxn4</b>         | 4.97765 | 0.151841  | 5.03483     | 0.0183521   |
| <b>Kcns2</b>         | 4.97189 | 0         | 1.7977E+308 | 0           |
| <b>Ntng1</b>         | 4.9559  | 0         | 1.7977E+308 | 0           |
| <b>Gm10597</b>       | 4.94978 | 0         | 1.7977E+308 | 2.88702E-10 |
| <b>2810032G03Rik</b> | 4.89905 | 0.236373  | 4.37336     | 0.0247531   |
| <b>Grin2c</b>        | 4.89571 | 0.107953  | 5.50304     | 0.000756824 |
| <b>Hes5</b>          | 4.8807  | 0         | 1.7977E+308 | 1.8727E-11  |
| <b>Tmem132d</b>      | 4.8461  | 0         | 1.7977E+308 | 0           |
| <b>Opalin</b>        | 4.84564 | 0         | 1.7977E+308 | 3.53659E-42 |
| <b>Gm14915</b>       | 4.83994 | 0         | 1.7977E+308 | 0.0236288   |
| <b>snoU90</b>        | 4.8219  | 0         | 1.7977E+308 | 7.10593E-07 |

|                      |         |           |             |             |
|----------------------|---------|-----------|-------------|-------------|
| <b>Mchr1</b>         | 4.80944 | 0         | 1.7977E+308 | 1.29377E-45 |
| <b>Slc6a20a</b>      | 4.78813 | 0         | 1.7977E+308 | 8.32602E-32 |
| <b>Chrna4</b>        | 4.75872 | 0         | 1.7977E+308 | 7.23192E-15 |
| <b>9430031J16Rik</b> | 4.72779 | 0         | 1.7977E+308 | 0           |
| <b>1700019N12Rik</b> | 4.71325 | 0         | 1.7977E+308 | 4.28632E-23 |
| <b>Klhl4</b>         | 4.6821  | 0.120991  | 5.27418     | 0.0475815   |
| <b>Prr18</b>         | 4.66972 | 0         | 1.7977E+308 | 0           |
| <b>March11</b>       | 4.65904 | 0         | 1.7977E+308 | 7.41576E-21 |
| <b>Prdm8</b>         | 4.65069 | 0.163154  | 4.83314     | 0.00345602  |
| <b>Calb2</b>         | 4.65024 | 0         | 1.7977E+308 | 1.84115E-36 |
| <b>Gpr68</b>         | 4.63317 | 0.209642  | 4.466       | 0.00390006  |
| <b>Kctd4</b>         | 4.62896 | 0         | 1.7977E+308 | 0           |
| <b>Elfn2</b>         | 4.62363 | 0.0701292 | 6.04286     | 0.00588446  |
| <b>Epha10</b>        | 4.61781 | 0         | 1.7977E+308 | 6.18586E-41 |
| <b>Plxnc1</b>        | 4.60909 | 0.234843  | 4.29472     | 9.18594E-09 |
| <b>Pla2g4e</b>       | 4.59802 | 0         | 1.7977E+308 | 0           |
| <b>E130309D14Rik</b> | 4.58438 | 0.192868  | 4.57104     | 0.00006732  |
| <b>Cplx3</b>         | 4.57445 | 0.167307  | 4.77303     | 0.00395844  |
| <b>Fam181b</b>       | 4.55081 | 0         | 1.7977E+308 | 5.79251E-41 |
| <b>Wscd2</b>         | 4.53656 | 0         | 1.7977E+308 | 0           |
| <b>1110035M17Rik</b> | 4.53059 | 0         | 1.7977E+308 | 2.18973E-13 |
| <b>Gm14285</b>       | 4.50239 | 0         | 1.7977E+308 | 1.08823E-07 |
| <b>Rspo2</b>         | 4.49424 | 0         | 1.7977E+308 | 0           |
| <b>Egr4</b>          | 4.48946 | 0         | 1.7977E+308 | 1.87455E-43 |
| <b>Zfp382</b>        | 4.46966 | 0         | 1.7977E+308 | 6.60866E-07 |
| <b>AW495222</b>      | 4.41855 | 0         | 1.7977E+308 | 8.80499E-18 |
| <b>Rbm24</b>         | 4.40946 | 0         | 1.7977E+308 | 0           |
| <b>Tmsb15b2</b>      | 4.40638 | 0         | 1.7977E+308 | 2.12856E-05 |
| <b>Masp1</b>         | 4.40468 | 0.158558  | 4.79596     | 0.032846    |
| <b>4933400F03Rik</b> | 4.40433 | 0         | 1.7977E+308 | 7.21236E-12 |
| <b>Coro6</b>         | 4.37842 | 0         | 1.7977E+308 | 0           |
| <b>Scube1</b>        | 4.37599 | 0.0582593 | 6.23098     | 0.00128761  |
| <b>Fam43b</b>        | 4.36835 | 0         | 1.7977E+308 | 1.4013E-45  |
| <b>Usp13</b>         | 4.36546 | 0         | 1.7977E+308 | 3.10726E-21 |
| <b>Olig2</b>         | 4.35391 | 0         | 1.7977E+308 | 8.6786E-46  |
| <b>Gm13302</b>       | 4.34321 | 0         | 1.7977E+308 | 9.26605E-40 |
| <b>Cacna1e</b>       | 4.28429 | 0.0352376 | 6.9258      | 1.63876E-05 |
| <b>Pclo</b>          | 4.26159 | 0.233763  | 4.18827     | 0           |
| <b>Tmem169</b>       | 4.24422 | 0.0975456 | 5.44328     | 0.00297019  |
| <b>Gp1bb</b>         | 4.2368  | 0         | 1.7977E+308 | 1.66565E-23 |
| <b>Gldc</b>          | 4.23348 | 0         | 1.7977E+308 | 0           |
| <b>Pygo1</b>         | 4.20636 | 0.197478  | 4.41281     | 2.14E-08    |
| <b>Dscam</b>         | 4.2037  | 0         | 1.7977E+308 | 0           |
| <b>Ndst3</b>         | 4.1951  | 0         | 1.7977E+308 | 2.39445E-12 |
| <b>Tcap</b>          | 4.18381 | 0         | 1.7977E+308 | 5.46322E-25 |
| <b>Phf21b</b>        | 4.18141 | 0         | 1.7977E+308 | 4.13648E-05 |

|                      |         |           |             |             |
|----------------------|---------|-----------|-------------|-------------|
| <b>7SK</b>           | 4.15966 | 0         | 1.7977E+308 | 2.51547E-05 |
| <b>Slc6a13</b>       | 4.1219  | 0.2165    | 4.25087     | 0.0113408   |
| <b>Grp</b>           | 4.11294 | 0         | 1.7977E+308 | 6.09172E-22 |
| <b>Lsm3</b>          | 4.11131 | 0         | 1.7977E+308 | 9.96148E-07 |
| <b>Neurod1</b>       | 4.10286 | 0.219202  | 4.2263      | 0.0172732   |
| <b>4833422C13Rik</b> | 4.04661 | 0.151549  | 4.73886     | 0.00925642  |
| <b>Hhat1</b>         | 4.04073 | 0         | 1.7977E+308 | 0           |
| <b>Mgat4c</b>        | 4.03124 | 0         | 1.7977E+308 | 4.16823E-20 |
| <b>Zik1</b>          | 4.02832 | 0.0665413 | 5.91978     | 0.00111285  |
| <b>Kcnk4</b>         | 4.00891 | 0         | 1.7977E+308 | 1.17866E-36 |
| <b>Jakmip3</b>       | 4.0046  | 0         | 1.7977E+308 | 0           |
| <b>Fstl5</b>         | 3.98356 | 0         | 1.7977E+308 | 3.26469E-21 |
| <b>Fam123a</b>       | 3.98353 | 0         | 1.7977E+308 | 0           |
| <b>Cpne7</b>         | 3.9815  | 0         | 1.7977E+308 | 8.47671E-39 |
| <b>Sema3e</b>        | 3.9808  | 0.221848  | 4.16542     | 2.35902E-06 |
| <b>Kcna4</b>         | 3.96673 | 0         | 1.7977E+308 | 1.47031E-07 |
| <b>Odz4</b>          | 3.95707 | 0.170259  | 4.53863     | 5.1139E-13  |
| <b>Elovl2</b>        | 3.93986 | 0.0924034 | 5.41406     | 0.0488407   |
| <b>5930412G12Rik</b> | 3.93056 | 0         | 1.7977E+308 | 0.000270046 |
| <b>Dok7</b>          | 3.89856 | 0.210607  | 4.21032     | 0.00161338  |
| <b>Cecr6</b>         | 3.89755 | 0         | 1.7977E+308 | 8.40167E-20 |
| <b>Unc5d</b>         | 3.89698 | 0.0352625 | 6.78808     | 0.00541081  |
| <b>2200002K05Rik</b> | 3.8942  | 0         | 1.7977E+308 | 2.1323E-39  |
| <b>Pcdh17</b>        | 3.87006 | 0.198233  | 4.28709     | 2.24815E-11 |
| <b>Gm16042</b>       | 3.86331 | 0         | 1.7977E+308 | 7.12163E-29 |
| <b>Gm16179</b>       | 3.8514  | 0         | 1.7977E+308 | 1.1642E-06  |
| <b>Lrfn4</b>         | 3.8511  | 0.221386  | 4.12064     | 0.000434715 |
| <b>Ppp1r3g</b>       | 3.85013 | 0.203775  | 4.23985     | 0.0123538   |
| <b>Al854703</b>      | 3.84576 | 0         | 1.7977E+308 | 0           |
| <b>Ccdc65</b>        | 3.84016 | 0         | 1.7977E+308 | 4.04153E-12 |
| <b>AW047730</b>      | 3.83821 | 0         | 1.7977E+308 | 2.10562E-44 |
| <b>Kcns1</b>         | 3.81809 | 0         | 1.7977E+308 | 1.4013E-45  |
| <b>C530008M17Rik</b> | 3.80889 | 0         | 1.7977E+308 | 7.97015E-18 |
| <b>Pgr</b>           | 3.79718 | 0         | 1.7977E+308 | 0           |
| <b>Pkib</b>          | 3.79113 | 0         | 1.7977E+308 | 7.73819E-29 |
| <b>Grin2b</b>        | 3.76935 | 0         | 1.7977E+308 | 5.39297E-20 |
| <b>Mdga2</b>         | 3.76838 | 0         | 1.7977E+308 | 6.11254E-08 |
| <b>C230004F18Rik</b> | 3.76633 | 0         | 1.7977E+308 | 8.0459E-13  |
| <b>Fam123c</b>       | 3.74233 | 0.106106  | 5.14035     | 0.00177812  |
| <b>Lingo3</b>        | 3.73533 | 0         | 1.7977E+308 | 0           |
| <b>Mamld1</b>        | 3.73199 | 0.171992  | 4.43954     | 0.0178184   |
| <b>Cdh12</b>         | 3.72946 | 0.0809592 | 5.52563     | 0.000723845 |
| <b>Ppp1r14c</b>      | 3.71132 | 0         | 1.7977E+308 | 7.81225E-44 |
| <b>Gm9899</b>        | 3.70253 | 0         | 1.7977E+308 | 6.18529E-12 |
| <b>Gpr12</b>         | 3.69187 | 0         | 1.7977E+308 | 5.97531E-43 |
| <b>Nova2</b>         | 3.68002 | 0.116819  | 4.97736     | 0.000912836 |



|                      |         |           |             |             |
|----------------------|---------|-----------|-------------|-------------|
| <b>Kcnj12</b>        | 3.66612 | 0.121062  | 4.92044     | 0.0174864   |
| <b>Gm12371</b>       | 3.6622  | 0         | 1.7977E+308 | 6.75082E-26 |
| <b>Tmem74</b>        | 3.63799 | 0         | 1.7977E+308 | 6.67818E-32 |
| <b>Crh</b>           | 3.63547 | 0         | 1.7977E+308 | 1.15418E-29 |
| <b>Ripply2</b>       | 3.62972 | 0         | 1.7977E+308 | 6.49373E-10 |
| <b>Cdkl4</b>         | 3.59563 | 0.0974384 | 5.20561     | 0.00460994  |
| <b>Egr2</b>          | 3.59078 | 0         | 1.7977E+308 | 2.32859E-06 |
| <b>Hrk</b>           | 3.58891 | 0.0515091 | 6.12257     | 0.0007205   |
| <b>Pcdh20</b>        | 3.58298 | 0.18139   | 4.30399     | 0.000889343 |
| <b>Nr4a3</b>         | 3.56506 | 0.0669307 | 5.73511     | 0.029833    |
| <b>Robo3</b>         | 3.56426 | 0         | 1.7977E+308 | 6.29269E-25 |
| <b>Tnfaip6</b>       | 3.56156 | 0.161884  | 4.45948     | 0.0328099   |
| <b>Grik3</b>         | 3.55843 | 0         | 1.7977E+308 | 0           |
| <b>Gm16832</b>       | 3.5484  | 0         | 1.7977E+308 | 3.09267E-34 |
| <b>Fam40b</b>        | 3.53528 | 0.180281  | 4.29351     | 0.000781227 |
| <b>Cntnap5a</b>      | 3.51229 | 0         | 1.7977E+308 | 0           |
| <b>Dleu7</b>         | 3.51174 | 0         | 1.7977E+308 | 7.14095E-29 |
| <b>Ctxn2</b>         | 3.50751 | 0         | 1.7977E+308 | 4.47506E-24 |
| <b>Usp29</b>         | 3.50582 | 0         | 1.7977E+308 | 2.18987E-43 |
| <b>Gm16108</b>       | 3.49208 | 0         | 1.7977E+308 | 3.91047E-12 |
| <b>Ndp</b>           | 3.47863 | 0         | 1.7977E+308 | 5.99777E-37 |
| <b>Rpgrip1l</b>      | 3.4751  | 0.139306  | 4.64072     | 5.78077E-06 |
| <b>Trpm3</b>         | 3.47478 | 0.109483  | 4.98814     | 0.00985307  |
| <b>Nr2e1</b>         | 3.47211 | 0         | 1.7977E+308 | 6.28459E-13 |
| <b>Zfp583</b>        | 3.47077 | 0.138652  | 4.64572     | 0.0409436   |
| <b>Plcd4</b>         | 3.46663 | 0.191325  | 4.17944     | 5.14682E-05 |
| <b>Cntn3</b>         | 3.45852 | 0         | 1.7977E+308 | 0           |
| <b>Plcx3</b>         | 3.44696 | 0         | 1.7977E+308 | 1.35682E-16 |
| <b>Adra2c</b>        | 3.4467  | 0         | 1.7977E+308 | 0           |
| <b>Nacad</b>         | 3.43433 | 0.0567129 | 5.92021     | 0.00111239  |
| <b>Capn3</b>         | 3.43229 | 0         | 1.7977E+308 | 0.0297411   |
| <b>1110018N20Rik</b> | 3.41637 | 0         | 1.7977E+308 | 3.44396E-19 |
| <b>Iqck</b>          | 3.36729 | 0.152244  | 4.46713     | 0.0155499   |
| <b>Gm15852</b>       | 3.35403 | 0         | 1.7977E+308 | 3.58191E-20 |
| <b>Dscaml1</b>       | 3.35291 | 0         | 1.7977E+308 | 7.08904E-22 |
| <b>Gm16485</b>       | 3.31488 | 0         | 1.7977E+308 | 0           |
| <b>Cntnap4</b>       | 3.30046 | 0         | 1.7977E+308 | 0           |
| <b>Gjc2</b>          | 3.29856 | 0         | 1.7977E+308 | 1.52331E-35 |
| <b>Gm11627</b>       | 3.29701 | 0         | 1.7977E+308 | 9.89576E-12 |
| <b>Grm1</b>          | 3.2937  | 0         | 1.7977E+308 | 5.32703E-16 |
| <b>Etv4</b>          | 3.27634 | 0         | 1.7977E+308 | 2.36626E-11 |
| <b>Hmga1-rs1</b>     | 3.25701 | 0         | 1.7977E+308 | 1.16447E-16 |
| <b>Lhfpl3</b>        | 3.25113 | 0         | 1.7977E+308 | 7.22238E-14 |
| <b>Slc5a5</b>        | 3.25053 | 0.149327  | 4.44413     | 0.046882    |
| <b>Ptgs2</b>         | 3.24463 | 0.0674864 | 5.58731     | 0.00220498  |
| <b>Gm20393</b>       | 3.23854 | 0         | 1.7977E+308 | 1.62393E-12 |

|                 |         |           |             |             |
|-----------------|---------|-----------|-------------|-------------|
| <b>Gpr83</b>    | 3.23584 | 0         | 1.7977E+308 | 0           |
| <b>Gm15631</b>  | 3.2302  | 0         | 1.7977E+308 | 1.98935E-15 |
| <b>Bfsp2</b>    | 3.2247  | 0         | 1.7977E+308 | 2.60813E-18 |
| <b>Kcnk9</b>    | 3.21805 | 0         | 1.7977E+308 | 1.88176E-25 |
| <b>Zkscan2</b>  | 3.21055 | 0         | 1.7977E+308 | 1.60322E-14 |
| <b>Prr16</b>    | 3.19606 | 0         | 1.7977E+308 | 0           |
| <b>Gm10493</b>  | 3.18987 | 0         | 1.7977E+308 | 2.39057E-11 |
| <b>Gm16871</b>  | 3.1878  | 0         | 1.7977E+308 | 1.19745E-40 |
| <b>Dbx2</b>     | 3.17263 | 0         | 1.7977E+308 | 0           |
| <b>Htr7</b>     | 3.16302 | 0         | 1.7977E+308 | 0           |
| <b>Pcdh8</b>    | 3.163   | 0.116032  | 4.76869     | 0.00399757  |
| <b>Gm17305</b>  | 3.15935 | 0         | 1.7977E+308 | 5.994E-09   |
| <b>Gm10595</b>  | 3.15613 | 0         | 1.7977E+308 | 5.73153E-07 |
| <b>Fam55c</b>   | 3.14854 | 0.0871801 | 5.17454     | 6.19653E-05 |
| <b>Cdh19</b>    | 3.13466 | 0.114165  | 4.77911     | 0.0335483   |
| <b>Fam135b</b>  | 3.13411 | 0         | 1.7977E+308 | 0           |
| <b>Wnt10a</b>   | 3.11749 | 0         | 1.7977E+308 | 6.06714E-40 |
| <b>Raver2</b>   | 3.09279 | 0.0485106 | 5.99446     | 0.0308974   |
| <b>Gm10930</b>  | 3.08784 | 0.0785689 | 5.2965      | 0.00440327  |
| <b>Trpc6</b>    | 3.07996 | 0.186669  | 4.04436     | 0.0471565   |
| <b>Gcnt4</b>    | 3.07861 | 0.066589  | 5.53085     | 0.0124223   |
| <b>Trpc4</b>    | 3.05596 | 0.098338  | 4.95773     | 0.0454837   |
| <b>Gm13629</b>  | 3.05443 | 0         | 1.7977E+308 | 1.04504E-15 |
| <b>Gm14233</b>  | 3.04581 | 0         | 1.7977E+308 | 0.000307249 |
| <b>Slc9a5</b>   | 3.03921 | 0         | 1.7977E+308 | 0           |
| <b>Htr5a</b>    | 3.02301 | 0         | 1.7977E+308 | 0           |
| <b>Cdh9</b>     | 3.02078 | 0         | 1.7977E+308 | 1.48516E-42 |
| <b>Nog</b>      | 2.97744 | 0         | 1.7977E+308 | 8.46005E-34 |
| <b>Gm996</b>    | 2.97557 | 0         | 1.7977E+308 | 0           |
| <b>Ccdc39</b>   | 2.93903 | 0.121636  | 4.5947      | 0.0085794   |
| <b>Bcl11b</b>   | 2.93249 | 0.125237  | 4.5494      | 0.000283116 |
| <b>Ano4</b>     | 2.93084 | 0         | 1.7977E+308 | 0           |
| <b>Gm17081</b>  | 2.92403 | 0         | 1.7977E+308 | 1.02804E-07 |
| <b>7SK</b>      | 2.92401 | 0         | 1.7977E+308 | 0.00128116  |
| <b>Cort</b>     | 2.92276 | 0         | 1.7977E+308 | 2.43992E-12 |
| <b>Ccdc74a</b>  | 2.91699 | 0         | 1.7977E+308 | 3.14404E-25 |
| <b>Grik4</b>    | 2.91653 | 0.118122  | 4.6259      | 0.00024647  |
| <b>Il1rap1l</b> | 2.89756 | 0         | 1.7977E+308 | 0           |
| <b>Prkg2</b>    | 2.89704 | 0         | 1.7977E+308 | 3.32424E-10 |
| <b>Vwc2</b>     | 2.88291 | 0         | 1.7977E+308 | 7.91097E-25 |
| <b>Gm12868</b>  | 2.87448 | 0         | 1.7977E+308 | 3.54335E-06 |
| <b>Gira2</b>    | 2.87237 | 0         | 1.7977E+308 | 1.81523E-43 |
| <b>Zfp423</b>   | 2.86868 | 0.177377  | 4.01549     | 0.00365288  |
| <b>Gpr61</b>    | 2.86463 | 0         | 1.7977E+308 | 0           |
| <b>Gm3209</b>   | 2.85449 | 0         | 1.7977E+308 | 0.0135896   |
| <b>Hmgcll1</b>  | 2.85295 | 0.124497  | 4.51828     | 0.00665734  |

|                      |         |           |             |             |
|----------------------|---------|-----------|-------------|-------------|
| <b>Stk30</b>         | 2.84611 | 0         | 1.7977E+308 | 2.79289E-28 |
| <b>Htr1a</b>         | 2.83683 | 0         | 1.7977E+308 | 0           |
| <b>MyI1</b>          | 2.81727 | 0         | 1.7977E+308 | 6.04176E-11 |
| <b>2610316D01Rik</b> | 2.76092 | 0         | 1.7977E+308 | 2.89101E-17 |
| <b>Gm14205</b>       | 2.75849 | 0         | 1.7977E+308 | 9.04255E-13 |
| <b>Epha6</b>         | 2.75724 | 0         | 1.7977E+308 | 1.03945E-42 |
| <b>Neur1b</b>        | 2.7538  | 0.137151  | 4.32759     | 0.000463502 |
| <b>Gm13322</b>       | 2.74328 | 0         | 1.7977E+308 | 0.0218665   |
| <b>A330041J22Rik</b> | 2.73678 | 0         | 1.7977E+308 | 0.000789554 |
| <b>Gm20530</b>       | 2.72319 | 0         | 1.7977E+308 | 0.0128052   |
| <b>Slc1a6</b>        | 2.70102 | 0         | 1.7977E+308 | 9.42356E-34 |
| <b>Gm10590</b>       | 2.69994 | 0.0851664 | 4.9865      | 0.00331604  |
| <b>Rnf182</b>        | 2.69984 | 0         | 1.7977E+308 | 1.91296E-10 |
| <b>RP23-428N8.1</b>  | 2.69906 | 0         | 1.7977E+308 | 1.45074E-09 |
| <b>4930570G19Rik</b> | 2.68366 | 0         | 1.7977E+308 | 5.55001E-14 |
| <b>Rnf165</b>        | 2.67081 | 0         | 1.7977E+308 | 0           |
| <b>E130114P18Rik</b> | 2.66233 | 0         | 1.7977E+308 | 2.40772E-14 |
| <b>Adcy8</b>         | 2.64647 | 0.0928552 | 4.83294     | 0.0181729   |
| <b>1700071M16Rik</b> | 2.63345 | 0         | 1.7977E+308 | 1.01684E-11 |
| <b>Mdga2</b>         | 2.63154 | 0         | 1.7977E+308 | 0           |
| <b>D930007J09Rik</b> | 2.59651 | 0         | 1.7977E+308 | 4.48361E-05 |
| <b>Gad1-ps</b>       | 2.58595 | 0         | 1.7977E+308 | 3.10241E-42 |
| <b>Gm11646</b>       | 2.58585 | 0         | 1.7977E+308 | 3.34965E-05 |
| <b>Gm3764</b>        | 2.54787 | 0         | 1.7977E+308 | 1.75936E-19 |
| <b>4933409K07Rik</b> | 2.54476 | 0         | 1.7977E+308 | 3.26207E-28 |
| <b>Gpr3</b>          | 2.54355 | 0         | 1.7977E+308 | 7.87257E-28 |
| <b>Tcerg1l</b>       | 2.49546 | 0         | 1.7977E+308 | 1.40905E-14 |
| <b>Lrrc6</b>         | 2.49012 | 0         | 1.7977E+308 | 3.59547E-32 |
| <b>Gm15663</b>       | 2.48875 | 0.15436   | 4.01105     | 0.011655    |
| <b>Gm1337</b>        | 2.4809  | 0         | 1.7977E+308 | 0           |
| <b>Megf10</b>        | 2.47948 | 0         | 1.7977E+308 | 0           |
| <b>Gdf11</b>         | 2.47029 | 0.114019  | 4.43733     | 0.0078075   |
| <b>Dear1</b>         | 2.44571 | 0         | 1.7977E+308 | 1.21052E-07 |
| <b>C030030A07Rik</b> | 2.43828 | 0         | 1.7977E+308 | 1.43585E-21 |
| <b>Gpr62</b>         | 2.41711 | 0         | 1.7977E+308 | 2.11371E-30 |
| <b>Gm15642</b>       | 2.41675 | 0         | 1.7977E+308 | 0.00245708  |
| <b>Ankrd34c</b>      | 2.41056 | 0         | 1.7977E+308 | 6.45535E-35 |
| <b>Efcab10</b>       | 2.39192 | 0         | 1.7977E+308 | 2.40967E-10 |
| <b>Pou3f2</b>        | 2.38036 | 0         | 1.7977E+308 | 3.29134E-27 |
| <b>Gm13446</b>       | 2.37112 | 0         | 1.7977E+308 | 5.69419E-09 |
| <b>Gm16255</b>       | 2.36282 | 0         | 1.7977E+308 | 5.81945E-14 |
| <b>Slc8a3</b>        | 2.36012 | 0         | 1.7977E+308 | 5.87715E-44 |
| <b>Nudt17</b>        | 2.34796 | 0         | 1.7977E+308 | 5.30507E-22 |
| <b>Flrt1</b>         | 2.34656 | 0.066007  | 5.15179     | 0.00751154  |
| <b>Gpr75</b>         | 2.34044 | 0.0732128 | 4.99854     | 0.0484515   |
| <b>Gm15738</b>       | 2.33446 | 0         | 1.7977E+308 | 0.00007904  |

|                      |         |           |             |             |
|----------------------|---------|-----------|-------------|-------------|
| <b>Rbm11</b>         | 2.33071 | 0         | 1.7977E+308 | 8.39965E-28 |
| <b>Gm12497</b>       | 2.31169 | 0         | 1.7977E+308 | 0.0390279   |
| <b>Zbtb8b</b>        | 2.31166 | 0         | 1.7977E+308 | 1.71075E-07 |
| <b>Drd1a</b>         | 2.30371 | 0         | 1.7977E+308 | 5.33079E-41 |
| <b>Clgn</b>          | 2.28779 | 0         | 1.7977E+308 | 0           |
| <b>Ccdc37</b>        | 2.27044 | 0         | 1.7977E+308 | 0.00558111  |
| <b>Elfn1</b>         | 2.25447 | 0.121608  | 4.21247     | 0.0119888   |
| <b>Nxf7</b>          | 2.24849 | 0         | 1.7977E+308 | 7.93641E-09 |
| <b>Bean1</b>         | 2.2465  | 0         | 1.7977E+308 | 0           |
| <b>Hgf</b>           | 2.24518 | 0         | 1.7977E+308 | 6.393E-36   |
| <b>Tekt5</b>         | 2.22566 | 0         | 1.7977E+308 | 7.12231E-23 |
| <b>Shisa6</b>        | 2.22395 | 0.106952  | 4.37809     | 0.0226878   |
| <b>Gpr27</b>         | 2.21705 | 0         | 1.7977E+308 | 4.30197E-18 |
| <b>Npl</b>           | 2.18168 | 0         | 1.7977E+308 | 4.05871E-22 |
| <b>Zfpm2</b>         | 2.17981 | 0.104563  | 4.38176     | 0.0344144   |
| <b>Pld5</b>          | 2.17417 | 0         | 1.7977E+308 | 6.54458E-42 |
| <b>Cntn5</b>         | 2.17398 | 0         | 1.7977E+308 | 0.000136743 |
| <b>Ppapdc1a</b>      | 2.17056 | 0         | 1.7977E+308 | 1.26595E-16 |
| <b>S1pr5</b>         | 2.17006 | 0.115699  | 4.22929     | 0.0241933   |
| <b>Hunk</b>          | 2.15541 | 0.112942  | 4.25431     | 0.00119042  |
| <b>Oprd1</b>         | 2.12557 | 0         | 1.7977E+308 | 1.08773E-42 |
| <b>Khdrbs2</b>       | 2.11652 | 0         | 1.7977E+308 | 7.63876E-21 |
| <b>Gm15860</b>       | 2.1112  | 0         | 1.7977E+308 | 5.99134E-05 |
| <b>BB114351</b>      | 2.10395 | 0         | 1.7977E+308 | 2.02456E-29 |
| <b>1700007K13Rik</b> | 2.10335 | 0         | 1.7977E+308 | 5.49321E-06 |
| <b>Lmln</b>          | 2.10057 | 0.0314152 | 6.06317     | 0.0305021   |
| <b>Gm13872</b>       | 2.08062 | 0         | 1.7977E+308 | 1.31921E-21 |
| <b>Htr2c</b>         | 2.07864 | 0         | 1.7977E+308 | 0           |
| <b>Zfp811</b>        | 2.07703 | 0         | 1.7977E+308 | 1.49829E-24 |
| <b>D630023F18Rik</b> | 2.07356 | 0         | 1.7977E+308 | 3.59017E-11 |
| <b>Grip1</b>         | 2.06263 | 0         | 1.7977E+308 | 0           |
| <b>Trim66</b>        | 2.04138 | 0         | 1.7977E+308 | 0           |
| <b>1500017E21Rik</b> | 2.03828 | 0         | 1.7977E+308 | 3.39153E-10 |
| <b>Fosb</b>          | 2.03267 | 0         | 1.7977E+308 | 2.04043E-38 |
| <b>Gpr173</b>        | 2.03223 | 0         | 1.7977E+308 | 1.40669E-18 |
| <b>Gm17595</b>       | 2.01483 | 0         | 1.7977E+308 | 7.82805E-43 |
| <b>Al118078</b>      | 2.01124 | 0         | 1.7977E+308 | 1.19291E-14 |
| <b>9230115E21Rik</b> | 2.0053  | 0         | 1.7977E+308 | 1.15597E-07 |
| <b>Gm13298</b>       | 2.00301 | 0.0564247 | 5.1497      | 0.0218139   |
| <b>AL627182.1</b>    | 2.00241 | 0         | 1.7977E+308 | 0.0461038   |
| <b>Kcnb2</b>         | 1.97399 | 0         | 1.7977E+308 | 7.75659E-36 |
| <b>Scrt2</b>         | 1.9514  | 0.0832869 | 4.55028     | 0.014494    |
| <b>AL591070.1</b>    | 1.93473 | 0         | 1.7977E+308 | 0.0181729   |
| <b>Rimkla</b>        | 1.93364 | 0.112995  | 4.09698     | 0.0157332   |
| <b>Nppc</b>          | 1.93127 | 0         | 1.7977E+308 | 2.23323E-14 |
| <b>C1ql1</b>         | 1.92573 | 0         | 1.7977E+308 | 4.93358E-21 |

|                      |         |           |             |             |
|----------------------|---------|-----------|-------------|-------------|
| <b>4933407L21Rik</b> | 1.92271 | 0         | 1.7977E+308 | 2.1923E-06  |
| <b>Zdbf2</b>         | 1.91996 | 0.10113   | 4.2468      | 0.000462272 |
| <b>Npas4</b>         | 1.90441 | 0         | 1.7977E+308 | 1.27987E-35 |
| <b>Zfp804a</b>       | 1.89179 | 0         | 1.7977E+308 | 3.55928E-43 |
| <b>Tnfrsf25</b>      | 1.88658 | 0         | 1.7977E+308 | 0.000349081 |
| <b>Gm15878</b>       | 1.88607 | 0         | 1.7977E+308 | 0.0113257   |
| <b>Gm1568</b>        | 1.88437 | 0         | 1.7977E+308 | 0           |
| <b>Samd5</b>         | 1.88425 | 0         | 1.7977E+308 | 1.21426E-30 |
| <b>Gm2542</b>        | 1.88389 | 0.0594982 | 4.98473     | 0.027003    |
| <b>Glra3</b>         | 1.88099 | 0         | 1.7977E+308 | 5.56295E-15 |
| <b>Gm17456</b>       | 1.86561 | 0         | 1.7977E+308 | 3.36968E-36 |
| <b>Gm12224</b>       | 1.86386 | 0         | 1.7977E+308 | 1.33429E-06 |
| <b>Gm5423</b>        | 1.85126 | 0         | 1.7977E+308 | 0.000012458 |
| <b>Zscan18</b>       | 1.84668 | 0.077671  | 4.57141     | 0.0139935   |
| <b>Mrap2</b>         | 1.84593 | 0         | 1.7977E+308 | 7.25858E-08 |
| <b>Igfn1</b>         | 1.83803 | 0         | 1.7977E+308 | 2.43487E-15 |
| <b>Nik-ps1</b>       | 1.822   | 0         | 1.7977E+308 | 3.07286E-16 |
| <b>Pnma3</b>         | 1.81817 | 0         | 1.7977E+308 | 4.97201E-36 |
| <b>Htr3a</b>         | 1.81213 | 0         | 1.7977E+308 | 1.26674E-26 |
| <b>C230037L18Rik</b> | 1.80911 | 0         | 1.7977E+308 | 0.00204895  |
| <b>Qrfpr</b>         | 1.80731 | 0         | 1.7977E+308 | 2.33419E-23 |
| <b>Crabp2</b>        | 1.80405 | 0         | 1.7977E+308 | 9.06671E-12 |
| <b>Mcf2</b>          | 1.80367 | 0         | 1.7977E+308 | 1.66326E-40 |
| <b>Gucy2g</b>        | 1.80227 | 0         | 1.7977E+308 | 9.48243E-38 |
| <b>Grip2</b>         | 1.802   | 0.050018  | 5.17101     | 0.0049416   |
| <b>Susd5</b>         | 1.78837 | 0.0724278 | 4.62596     | 0.0127896   |
| <b>Sox21</b>         | 1.78751 | 0         | 1.7977E+308 | 1.81916E-41 |
| <b>Accn4</b>         | 1.78613 | 0         | 1.7977E+308 | 1.2787E-32  |
| <b>AC122525.1</b>    | 1.7825  | 0         | 1.7977E+308 | 0.0246857   |
| <b>Spag6</b>         | 1.78129 | 0         | 1.7977E+308 | 3.56906E-06 |
| <b>Col9a2</b>        | 1.77307 | 0         | 1.7977E+308 | 4.54072E-09 |
| <b>Gpr165</b>        | 1.77199 | 0         | 1.7977E+308 | 9.49706E-33 |
| <b>0610040B10Rik</b> | 1.76992 | 0         | 1.7977E+308 | 9.97167E-06 |
| <b>Mylk3</b>         | 1.75886 | 0         | 1.7977E+308 | 4.13954E-06 |
| <b>Cyp11a1</b>       | 1.75536 | 0         | 1.7977E+308 | 2.59142E-23 |
| <b>Gm694</b>         | 1.74786 | 0         | 1.7977E+308 | 5.04083E-11 |
| <b>Ocm</b>           | 1.74497 | 0         | 1.7977E+308 | 0.00717337  |
| <b>Gm10594</b>       | 1.73673 | 0         | 1.7977E+308 | 0.000223025 |
| <b>March4</b>        | 1.73424 | 0         | 1.7977E+308 | 3.47275E-41 |
| <b>Atp13a5</b>       | 1.73314 | 0         | 1.7977E+308 | 2.5819E-20  |
| <b>Gm13687</b>       | 1.73179 | 0         | 1.7977E+308 | 0.031157    |
| <b>Gm7819</b>        | 1.73075 | 0         | 1.7977E+308 | 1.49609E-35 |
| <b>Frm3</b>          | 1.71733 | 0         | 1.7977E+308 | 3.96229E-31 |
| <b>Scn8a</b>         | 1.71435 | 0         | 1.7977E+308 | 4.18933E-13 |
| <b>Gm4392</b>        | 1.70687 | 0         | 1.7977E+308 | 0.00551796  |
| <b>Tnnt2</b>         | 1.69573 | 0         | 1.7977E+308 | 4.76241E-13 |

|                      |         |           |             |             |
|----------------------|---------|-----------|-------------|-------------|
| <b>Spag4</b>         | 1.69226 | 0         | 1.7977E+308 | 0.000773282 |
| <b>Gm8812</b>        | 1.69012 | 0         | 1.7977E+308 | 0.000481248 |
| <b>Gm9925</b>        | 1.68449 | 0         | 1.7977E+308 | 4.29936E-05 |
| <b>Alox12b</b>       | 1.68326 | 0         | 1.7977E+308 | 8.39034E-28 |
| <b>AC131316.1</b>    | 1.68015 | 0         | 1.7977E+308 | 0.02373     |
| <b>Gm10047</b>       | 1.6782  | 0         | 1.7977E+308 | 2.44573E-16 |
| <b>Gm15760</b>       | 1.6749  | 0         | 1.7977E+308 | 0.023822    |
| <b>Gm13845</b>       | 1.67125 | 0         | 1.7977E+308 | 4.19039E-12 |
| <b>BC061194</b>      | 1.66646 | 0         | 1.7977E+308 | 1.21682E-07 |
| <b>Gm16008</b>       | 1.66194 | 0         | 1.7977E+308 | 0.00223431  |
| <b>Npy5r</b>         | 1.65299 | 0         | 1.7977E+308 | 8.82049E-27 |
| <b>Amn</b>           | 1.65129 | 0         | 1.7977E+308 | 4.7528E-21  |
| <b>Dmrtc1a</b>       | 1.65106 | 0         | 1.7977E+308 | 6.43057E-14 |
| <b>Slc13a4</b>       | 1.64904 | 0         | 1.7977E+308 | 7.45663E-34 |
| <b>RP23-341C5.10</b> | 1.64249 | 0         | 1.7977E+308 | 0.000129357 |
| <b>Gm5859</b>        | 1.63585 | 0         | 1.7977E+308 | 5.75728E-26 |
| <b>Zfp831</b>        | 1.63076 | 0.0678285 | 4.58751     | 0.000516039 |
| <b>Gm20509</b>       | 1.62105 | 0         | 1.7977E+308 | 0.0347733   |
| <b>Gm17202</b>       | 1.6198  | 0         | 1.7977E+308 | 5.44831E-11 |
| <b>Vwa5b1</b>        | 1.61134 | 0         | 1.7977E+308 | 3.74763E-05 |
| <b>Car12</b>         | 1.59955 | 0         | 1.7977E+308 | 7.84135E-11 |
| <b>Gm16284</b>       | 1.58724 | 0         | 1.7977E+308 | 0.000825928 |
| <b>Smad9</b>         | 1.57513 | 0.0852046 | 4.20839     | 0.0120659   |
| <b>Dmp1</b>          | 1.57374 | 0         | 1.7977E+308 | 2.52615E-29 |
| <b>Gm15655</b>       | 1.56451 | 0         | 1.7977E+308 | 0.000410697 |
| <b>Grm4</b>          | 1.56066 | 0         | 1.7977E+308 | 2.01104E-40 |
| <b>Tmem132c</b>      | 1.56017 | 0.0892457 | 4.12777     | 0.0158418   |
| <b>Igsf9b</b>        | 1.55716 | 0         | 1.7977E+308 | 1.02941E-39 |
| <b>Frmpd3</b>        | 1.55361 | 0         | 1.7977E+308 | 3.27547E-08 |
| <b>Gm12394</b>       | 1.5503  | 0         | 1.7977E+308 | 1.60874E-32 |
| <b>Slc30a10</b>      | 1.54354 | 0         | 1.7977E+308 | 5.21256E-44 |
| <b>Gm12788</b>       | 1.54319 | 0         | 1.7977E+308 | 0.0164637   |
| <b>Clcn1</b>         | 1.53621 | 0         | 1.7977E+308 | 1.25464E-06 |
| <b>Vwa3a</b>         | 1.52983 | 0.0844768 | 4.17867     | 0.0361744   |
| <b>Cox6b2</b>        | 1.5115  | 0         | 1.7977E+308 | 0.000015698 |
| <b>Insc</b>          | 1.51038 | 0         | 1.7977E+308 | 0.00017032  |
| <b>Eya1</b>          | 1.50706 | 0         | 1.7977E+308 | 3.36152E-42 |
| <b>Gm2464</b>        | 1.50198 | 0         | 1.7977E+308 | 3.71767E-27 |
| <b>Ctxn3</b>         | 1.49459 | 0         | 1.7977E+308 | 2.04238E-16 |
| <b>Zic2</b>          | 1.48474 | 0         | 1.7977E+308 | 2.14192E-23 |
| <b>Hhip</b>          | 1.48099 | 0         | 1.7977E+308 | 1.4419E-11  |
| <b>Fam59b</b>        | 1.47662 | 0         | 1.7977E+308 | 1.18439E-34 |
| <b>1110017D15Rik</b> | 1.4752  | 0         | 1.7977E+308 | 0.0284213   |
| <b>Gm17180</b>       | 1.47503 | 0         | 1.7977E+308 | 0.000728427 |
| <b>Nos1</b>          | 1.47498 | 0         | 1.7977E+308 | 4.90411E-13 |
| <b>Grid2</b>         | 1.47415 | 0         | 1.7977E+308 | 6.57409E-43 |

|                      |         |           |             |             |
|----------------------|---------|-----------|-------------|-------------|
| <b>Asgr1</b>         | 1.47207 | 0         | 1.7977E+308 | 6.04656E-05 |
| <b>A330048O09Rik</b> | 1.46536 | 0         | 1.7977E+308 | 9.03407E-07 |
| <b>Fgfbp1</b>        | 1.46004 | 0         | 1.7977E+308 | 2.55194E-12 |
| <b>Doc2b</b>         | 1.45691 | 0.0639506 | 4.50981     | 0.0154899   |
| <b>Dazl</b>          | 1.45631 | 0         | 1.7977E+308 | 1.6294E-28  |
| <b>Gm13558</b>       | 1.45318 | 0         | 1.7977E+308 | 0.000028035 |
| <b>Cntnap5b</b>      | 1.43827 | 0         | 1.7977E+308 | 6.56074E-40 |
| <b>Gm14057</b>       | 1.43571 | 0         | 1.7977E+308 | 0.00034575  |
| <b>Tmco5</b>         | 1.43284 | 0         | 1.7977E+308 | 1.03953E-05 |
| <b>Kcnb2</b>         | 1.43026 | 0         | 1.7977E+308 | 4.37039E-35 |
| <b>Tmem232</b>       | 1.42398 | 0         | 1.7977E+308 | 1.17294E-24 |
| <b>Sv2c</b>          | 1.42356 | 0.0600119 | 4.56811     | 0.0329168   |
| <b>Tmem40</b>        | 1.42329 | 0         | 1.7977E+308 | 2.13984E-11 |
| <b>Celsr3</b>        | 1.41501 | 0.066111  | 4.41978     | 0.000109024 |
| <b>Magee2</b>        | 1.41009 | 0         | 1.7977E+308 | 1.89244E-24 |
| <b>Fgfbp3</b>        | 1.40634 | 0         | 1.7977E+308 | 4.47204E-19 |
| <b>Slc4a1</b>        | 1.40461 | 0         | 1.7977E+308 | 0.0131291   |
| <b>Ccdc155</b>       | 1.39893 | 0         | 1.7977E+308 | 0.000105035 |
| <b>Gm15351</b>       | 1.39887 | 0         | 1.7977E+308 | 0.029701    |
| <b>Sftpc</b>         | 1.35636 | 0         | 1.7977E+308 | 7.98646E-08 |
| <b>Slc27a2</b>       | 1.3562  | 0         | 1.7977E+308 | 6.94701E-05 |
| <b>Gm15717</b>       | 1.35368 | 0         | 1.7977E+308 | 0.00964777  |
| <b>Gm9987</b>        | 1.34292 | 0         | 1.7977E+308 | 3.49984E-05 |
| <b>Kcnh4</b>         | 1.34181 | 0         | 1.7977E+308 | 5.23009E-35 |
| <b>5430405G05Rik</b> | 1.33878 | 0         | 1.7977E+308 | 5.5054E-14  |
| <b>Gm11629</b>       | 1.33469 | 0         | 1.7977E+308 | 0.00439515  |
| <b>4930441O14Rik</b> | 1.32282 | 0         | 1.7977E+308 | 6.13793E-21 |
| <b>Gm10118</b>       | 1.30091 | 0         | 1.7977E+308 | 7.55014E-25 |
| <b>Gna15</b>         | 1.29817 | 0         | 1.7977E+308 | 2.10647E-06 |
| <b>Gm17637</b>       | 1.29034 | 0         | 1.7977E+308 | 2.12308E-19 |
| <b>Gm17732</b>       | 1.28735 | 0         | 1.7977E+308 | 1.62464E-07 |
| <b>Vwc2l</b>         | 1.2862  | 0         | 1.7977E+308 | 3.23003E-25 |
| <b>Gm16040</b>       | 1.28525 | 0         | 1.7977E+308 | 5.41486E-05 |
| <b>Pcp2</b>          | 1.28499 | 0         | 1.7977E+308 | 3.94933E-06 |
| <b>5330434G04Rik</b> | 1.27929 | 0         | 1.7977E+308 | 4.92477E-18 |
| <b>Marcks11-ps4</b>  | 1.271   | 0         | 1.7977E+308 | 0.0408765   |
| <b>Nat1</b>          | 1.26875 | 0         | 1.7977E+308 | 6.83033E-13 |
| <b>Gpr150</b>        | 1.26527 | 0         | 1.7977E+308 | 1.15517E-20 |
| <b>Ccdc113</b>       | 1.26197 | 0         | 1.7977E+308 | 4.37739E-12 |
| <b>Gm3510</b>        | 1.25775 | 0         | 1.7977E+308 | 8.50341E-14 |
| <b>Fam196a</b>       | 1.2573  | 0         | 1.7977E+308 | 4.6952E-35  |
| <b>Gm8348</b>        | 1.25664 | 0         | 1.7977E+308 | 2.07934E-06 |
| <b>Actn2</b>         | 1.25582 | 0         | 1.7977E+308 | 3.40857E-28 |
| <b>Cwh43</b>         | 1.2518  | 0         | 1.7977E+308 | 1.3354E-07  |
| <b>Pip5kl1</b>       | 1.24925 | 0         | 1.7977E+308 | 2.93433E-07 |
| <b>Gm16535</b>       | 1.24834 | 0         | 1.7977E+308 | 0.0194932   |

|                      |         |   |             |             |
|----------------------|---------|---|-------------|-------------|
| <b>Cox8b</b>         | 1.24671 | 0 | 1.7977E+308 | 0.0125106   |
| <b>Gm9955</b>        | 1.23754 | 0 | 1.7977E+308 | 0.03439     |
| <b>Gm14169</b>       | 1.22954 | 0 | 1.7977E+308 | 1.18873E-23 |
| <b>Gm16309</b>       | 1.22801 | 0 | 1.7977E+308 | 0.0102107   |
| <b>Gm10434</b>       | 1.22024 | 0 | 1.7977E+308 | 0.000689536 |
| <b>7SK</b>           | 1.21997 | 0 | 1.7977E+308 | 0.0395015   |
| <b>Kbtbd5</b>        | 1.21722 | 0 | 1.7977E+308 | 3.25772E-23 |
| <b>Tnnt3</b>         | 1.21365 | 0 | 1.7977E+308 | 0.00237496  |
| <b>Wisp1</b>         | 1.21225 | 0 | 1.7977E+308 | 1.47882E-36 |
| <b>Sebox</b>         | 1.21078 | 0 | 1.7977E+308 | 7.57938E-12 |
| <b>AL672076.1</b>    | 1.20866 | 0 | 1.7977E+308 | 0.0433033   |
| <b>Gpr25</b>         | 1.2046  | 0 | 1.7977E+308 | 3.00165E-18 |
| <b>Gm7276</b>        | 1.20242 | 0 | 1.7977E+308 | 2.43102E-11 |
| <b>Spata9</b>        | 1.19949 | 0 | 1.7977E+308 | 1.53693E-08 |
| <b>3830431G21Rik</b> | 1.19616 | 0 | 1.7977E+308 | 0.00548576  |
| <b>9330188P03Rik</b> | 1.1914  | 0 | 1.7977E+308 | 1.44007E-08 |
| <b>Apol8</b>         | 1.18434 | 0 | 1.7977E+308 | 1.04505E-23 |
| <b>Gm3086</b>        | 1.18385 | 0 | 1.7977E+308 | 0.000235572 |
| <b>Kcnj14</b>        | 1.18255 | 0 | 1.7977E+308 | 5.71807E-24 |
| <b>Gm13659</b>       | 1.17307 | 0 | 1.7977E+308 | 2.32598E-05 |
| <b>Gm14004</b>       | 1.16786 | 0 | 1.7977E+308 | 9.21599E-05 |
| <b>Gm9996</b>        | 1.16783 | 0 | 1.7977E+308 | 7.90645E-08 |
| <b>Kiss1r</b>        | 1.16628 | 0 | 1.7977E+308 | 1.81443E-09 |
| <b>Rpe65</b>         | 1.16412 | 0 | 1.7977E+308 | 3.12342E-14 |
| <b>Tmem132e</b>      | 1.16191 | 0 | 1.7977E+308 | 4.25696E-17 |
| <b>Cox7b2</b>        | 1.15629 | 0 | 1.7977E+308 | 0.000313041 |
| <b>A830092H15Rik</b> | 1.15605 | 0 | 1.7977E+308 | 8.90473E-11 |
| <b>9430021M05Rik</b> | 1.15353 | 0 | 1.7977E+308 | 2.00652E-10 |
| <b>RP24-89N4.5</b>   | 1.15017 | 0 | 1.7977E+308 | 1.60219E-05 |
| <b>Arr3</b>          | 1.14906 | 0 | 1.7977E+308 | 0.000178093 |
| <b>Myh7</b>          | 1.14901 | 0 | 1.7977E+308 | 2.61704E-39 |
| <b>Zfp664</b>        | 1.14672 | 0 | 1.7977E+308 | 0.014558    |
| <b>Gpr45</b>         | 1.13954 | 0 | 1.7977E+308 | 1.61942E-13 |
| <b>D430036J16Rik</b> | 1.13909 | 0 | 1.7977E+308 | 1.7666E-12  |
| <b>Myl2</b>          | 1.13597 | 0 | 1.7977E+308 | 0.004154    |
| <b>A630023P12Rik</b> | 1.135   | 0 | 1.7977E+308 | 0.000437737 |
| <b>Agmat</b>         | 1.13365 | 0 | 1.7977E+308 | 3.89325E-12 |
| <b>Gm13300</b>       | 1.13307 | 0 | 1.7977E+308 | 1.82861E-13 |
| <b>Pmaip1</b>        | 1.12972 | 0 | 1.7977E+308 | 4.30222E-23 |
| <b>Gm715</b>         | 1.12928 | 0 | 1.7977E+308 | 5.76794E-07 |
| <b>Syt10</b>         | 1.12756 | 0 | 1.7977E+308 | 4.22908E-16 |
| <b>3010001F23Rik</b> | 1.11903 | 0 | 1.7977E+308 | 0.000482259 |
| <b>Gm9934</b>        | 1.11714 | 0 | 1.7977E+308 | 1.90629E-17 |
| <b>Gm16192</b>       | 1.11446 | 0 | 1.7977E+308 | 1.18287E-07 |
| <b>Dpf3</b>          | 1.11444 | 0 | 1.7977E+308 | 5.40584E-06 |
| <b>Gm11266</b>       | 1.11407 | 0 | 1.7977E+308 | 7.81769E-11 |



|                      |          |         |             |             |
|----------------------|----------|---------|-------------|-------------|
| <b>4930500M09Rik</b> | 1.11129  | 0       | 1.7977E+308 | 1.79689E-05 |
| <b>Il1rapl2</b>      | 1.10596  | 0       | 1.7977E+308 | 4.15747E-19 |
| <b>Fbxo47</b>        | 1.10583  | 0       | 1.7977E+308 | 4.94535E-07 |
| <b>Trhr2</b>         | 1.09986  | 0       | 1.7977E+308 | 2.24887E-11 |
| <b>Cbln1</b>         | 1.09957  | 0       | 1.7977E+308 | 1.11872E-10 |
| <b>2310026L22Rik</b> | 1.09787  | 0       | 1.7977E+308 | 0.00711736  |
| <b>Bambi-ps1</b>     | 1.09512  | 0       | 1.7977E+308 | 0.000148957 |
| <b>A430108G06Rik</b> | 1.09447  | 0       | 1.7977E+308 | 1.35785E-11 |
| <b>Gh</b>            | 1.09041  | 0       | 1.7977E+308 | 6.85236E-07 |
| <b>Gm266</b>         | 1.08895  | 0       | 1.7977E+308 | 5.04316E-10 |
| <b>Tbata</b>         | 1.08863  | 0       | 1.7977E+308 | 2.43924E-08 |
| <b>2610034M16Rik</b> | 1.08792  | 0.06696 | 4.02213     | 0.0331522   |
| <b>Gm13530</b>       | 1.0823   | 0       | 1.7977E+308 | 0.0113257   |
| <b>Gm11611</b>       | 1.08     | 0       | 1.7977E+308 | 5.54966E-11 |
| <b>Gm10543</b>       | 1.07721  | 0       | 1.7977E+308 | 2.36618E-13 |
| <b>A730056A06Rik</b> | 1.07485  | 0       | 1.7977E+308 | 1.17299E-21 |
| <b>Hey2</b>          | 1.07322  | 0       | 1.7977E+308 | 1.53225E-21 |
| <b>Gm15956</b>       | 1.07175  | 0       | 1.7977E+308 | 0.00105086  |
| <b>Med20</b>         | 1.07162  | 0       | 1.7977E+308 | 0.00370174  |
| <b>Htr1b</b>         | 1.0686   | 0       | 1.7977E+308 | 2.64387E-10 |
| <b>Kcng2</b>         | 1.06249  | 0       | 1.7977E+308 | 0.000020043 |
| <b>Ube2t</b>         | 1.06103  | 0       | 1.7977E+308 | 5.42775E-09 |
| <b>Spats1</b>        | 1.05943  | 0       | 1.7977E+308 | 7.72674E-08 |
| <b>Gm5150</b>        | 1.05804  | 0       | 1.7977E+308 | 3.32848E-07 |
| <b>Gm16707</b>       | 1.05363  | 0       | 1.7977E+308 | 1.40775E-09 |
| <b>Gm17543</b>       | 1.04545  | 0       | 1.7977E+308 | 7.97625E-12 |
| <b>Gm16266</b>       | 1.04252  | 0       | 1.7977E+308 | 0.000412746 |
| <b>Siah3</b>         | 1.03919  | 0       | 1.7977E+308 | 4.50299E-07 |
| <b>Klhl1</b>         | 1.03733  | 0       | 1.7977E+308 | 1.25767E-29 |
| <b>1700013G23Rik</b> | 1.03681  | 0       | 1.7977E+308 | 0.0499783   |
| <b>Gm15503</b>       | 1.03646  | 0       | 1.7977E+308 | 0.00282794  |
| <b>Gm10702</b>       | 1.03221  | 0       | 1.7977E+308 | 4.72339E-10 |
| <b>Sgcz</b>          | 1.03077  | 0       | 1.7977E+308 | 1.08678E-14 |
| <b>2900072N19Rik</b> | 1.03017  | 0       | 1.7977E+308 | 3.45004E-06 |
| <b>Gm13091</b>       | 1.02879  | 0       | 1.7977E+308 | 0.00228624  |
| <b>Gm16339</b>       | 1.02366  | 0       | 1.7977E+308 | 2.71036E-07 |
| <b>E530011L22Rik</b> | 1.02077  | 0       | 1.7977E+308 | 3.78533E-16 |
| <b>Cd7</b>           | 1.01438  | 0       | 1.7977E+308 | 2.04699E-07 |
| <b>Kcnk10</b>        | 1.01361  | 0       | 1.7977E+308 | 1.36672E-13 |
| <b>Gm10593</b>       | 1.00678  | 0       | 1.7977E+308 | 6.8444E-26  |
| <b>7SK</b>           | 1.0054   | 0       | 1.7977E+308 | 0.0274059   |
| <b>Gm13883</b>       | 1.00032  | 0       | 1.7977E+308 | 1.15271E-08 |
| <b>Gm16560</b>       | 0.99954  | 0       | 1.7977E+308 | 0.0121904   |
| <b>Cstad</b>         | 0.992456 | 0       | 1.7977E+308 | 5.45109E-05 |
| <b>1500035N22Rik</b> | 0.992249 | 0       | 1.7977E+308 | 1.51498E-06 |
| <b>2210008F06Rik</b> | 0.986252 | 0       | 1.7977E+308 | 3.28164E-08 |

|                      |          |   |             |             |
|----------------------|----------|---|-------------|-------------|
| <b>4930599N23Rik</b> | 0.980339 | 0 | 1.7977E+308 | 6.25304E-07 |
| <b>Tmem202</b>       | 0.979833 | 0 | 1.7977E+308 | 1.46885E-09 |
| <b>4732415M23Rik</b> | 0.979177 | 0 | 1.7977E+308 | 0.00103474  |
| <b>Dynlrb2</b>       | 0.973809 | 0 | 1.7977E+308 | 0.00233096  |
| <b>Ucp3</b>          | 0.972241 | 0 | 1.7977E+308 | 3.99837E-13 |
| <b>Kcnd1</b>         | 0.971165 | 0 | 1.7977E+308 | 1.76815E-32 |
| <b>Slc6a20b</b>      | 0.967712 | 0 | 1.7977E+308 | 8.60092E-08 |
| <b>Prima1</b>        | 0.965658 | 0 | 1.7977E+308 | 0.000194736 |
| <b>Fibcd1</b>        | 0.96413  | 0 | 1.7977E+308 | 6.78241E-31 |
| <b>Gm15624</b>       | 0.960858 | 0 | 1.7977E+308 | 2.43329E-05 |
| <b>2310050B05Rik</b> | 0.960482 | 0 | 1.7977E+308 | 1.01328E-08 |
| <b>Fgf22</b>         | 0.953507 | 0 | 1.7977E+308 | 0.000736405 |
| <b>Gm52</b>          | 0.950085 | 0 | 1.7977E+308 | 5.06119E-15 |
| <b>1700007P06Rik</b> | 0.948779 | 0 | 1.7977E+308 | 0.00140941  |
| <b>Gm10840</b>       | 0.943449 | 0 | 1.7977E+308 | 0.0463798   |
| <b>Gm17493</b>       | 0.928515 | 0 | 1.7977E+308 | 5.74824E-08 |
| <b>Slc22a6</b>       | 0.926864 | 0 | 1.7977E+308 | 5.1893E-27  |
| <b>Gm15849</b>       | 0.92524  | 0 | 1.7977E+308 | 0.0346912   |
| <b>Trfr2</b>         | 0.924288 | 0 | 1.7977E+308 | 9.52747E-20 |
| <b>Slc16a14</b>      | 0.919875 | 0 | 1.7977E+308 | 3.30651E-23 |
| <b>Gm15998</b>       | 0.919656 | 0 | 1.7977E+308 | 2.26552E-13 |
| <b>Ascl1</b>         | 0.918614 | 0 | 1.7977E+308 | 4.67531E-18 |
| <b>Gm12300</b>       | 0.918076 | 0 | 1.7977E+308 | 2.32461E-05 |
| <b>Cacng5</b>        | 0.918031 | 0 | 1.7977E+308 | 5.03085E-25 |
| <b>Gm2897</b>        | 0.918003 | 0 | 1.7977E+308 | 8.90998E-05 |
| <b>Gm13713</b>       | 0.913765 | 0 | 1.7977E+308 | 7.97909E-05 |
| <b>D930019O06Rik</b> | 0.911148 | 0 | 1.7977E+308 | 3.27101E-25 |
| <b>Ybx2</b>          | 0.902543 | 0 | 1.7977E+308 | 0.00094381  |
| <b>BC030867</b>      | 0.902451 | 0 | 1.7977E+308 | 1.13799E-05 |
| <b>4930479D17Rik</b> | 0.8981   | 0 | 1.7977E+308 | 5.07573E-05 |
| <b>2510046G10Rik</b> | 0.896193 | 0 | 1.7977E+308 | 0.0406344   |
| <b>Dlx5</b>          | 0.89503  | 0 | 1.7977E+308 | 1.14294E-09 |
| <b>Npas3</b>         | 0.892923 | 0 | 1.7977E+308 | 1.45919E-31 |
| <b>Pdzrn4</b>        | 0.892403 | 0 | 1.7977E+308 | 4.33548E-23 |
| <b>A830005F24Rik</b> | 0.889666 | 0 | 1.7977E+308 | 2.17556E-05 |
| <b>Gm13547</b>       | 0.88898  | 0 | 1.7977E+308 | 0.00842798  |
| <b>Rxfp2</b>         | 0.887965 | 0 | 1.7977E+308 | 3.82918E-12 |
| <b>Gm4409</b>        | 0.883838 | 0 | 1.7977E+308 | 2.78575E-13 |
| <b>Traip</b>         | 0.880764 | 0 | 1.7977E+308 | 6.85663E-19 |
| <b>Dbil5</b>         | 0.87824  | 0 | 1.7977E+308 | 0.000710355 |
| <b>1700112M01Rik</b> | 0.877194 | 0 | 1.7977E+308 | 1.35793E-05 |
| <b>1700030C12Rik</b> | 0.87695  | 0 | 1.7977E+308 | 0.0276395   |
| <b>Gm14259</b>       | 0.872279 | 0 | 1.7977E+308 | 2.26933E-08 |
| <b>Gm15623</b>       | 0.871821 | 0 | 1.7977E+308 | 0.000083    |
| <b>C230035I16Rik</b> | 0.871148 | 0 | 1.7977E+308 | 0.000551462 |
| <b>Gm16994</b>       | 0.868917 | 0 | 1.7977E+308 | 1.37858E-06 |

|                      |          |   |             |             |
|----------------------|----------|---|-------------|-------------|
| <b>AB041806</b>      | 0.864203 | 0 | 1.7977E+308 | 1.85197E-14 |
| <b>Fam129c</b>       | 0.860079 | 0 | 1.7977E+308 | 0.0220881   |
| <b>2010012P19Rik</b> | 0.855933 | 0 | 1.7977E+308 | 0.00140669  |
| <b>Gm11772</b>       | 0.854265 | 0 | 1.7977E+308 | 0.00178163  |
| <b>5330416C01Rik</b> | 0.851884 | 0 | 1.7977E+308 | 2.19551E-05 |
| <b>RP23-405M24.1</b> | 0.848377 | 0 | 1.7977E+308 | 0.0154034   |
| <b>B230369F24Rik</b> | 0.84404  | 0 | 1.7977E+308 | 2.98127E-17 |
| <b>1700003M02Rik</b> | 0.8401   | 0 | 1.7977E+308 | 0.000094779 |
| <b>Rab42-ps</b>      | 0.838703 | 0 | 1.7977E+308 | 5.36112E-05 |
| <b>Gm16033</b>       | 0.837585 | 0 | 1.7977E+308 | 0.00322614  |
| <b>Ak8</b>           | 0.834622 | 0 | 1.7977E+308 | 0.000177517 |
| <b>Pcdha3</b>        | 0.833195 | 0 | 1.7977E+308 | 2.82396E-16 |
| <b>Pde11a</b>        | 0.831701 | 0 | 1.7977E+308 | 1.0299E-12  |
| <b>WI1-1377A22.2</b> | 0.831556 | 0 | 1.7977E+308 | 0.000146406 |
| <b>Pou3f4</b>        | 0.831183 | 0 | 1.7977E+308 | 8.86733E-08 |
| <b>Gm16054</b>       | 0.830278 | 0 | 1.7977E+308 | 9.11225E-12 |
| <b>Prss22</b>        | 0.829621 | 0 | 1.7977E+308 | 1.42613E-08 |
| <b>Gm15726</b>       | 0.827167 | 0 | 1.7977E+308 | 0.00308547  |
| <b>Gm11637</b>       | 0.826663 | 0 | 1.7977E+308 | 0.0010351   |
| <b>Gm11940</b>       | 0.824735 | 0 | 1.7977E+308 | 0.0124935   |
| <b>Hsd3b3</b>        | 0.82393  | 0 | 1.7977E+308 | 0.00031533  |
| <b>3110070M22Rik</b> | 0.823926 | 0 | 1.7977E+308 | 2.59121E-07 |
| <b>Gm12525</b>       | 0.820285 | 0 | 1.7977E+308 | 0.00216687  |
| <b>3110082J24Rik</b> | 0.820055 | 0 | 1.7977E+308 | 0.00422934  |
| <b>Clec18a</b>       | 0.819218 | 0 | 1.7977E+308 | 5.90979E-13 |
| <b>Aard</b>          | 0.819189 | 0 | 1.7977E+308 | 1.11632E-08 |
| <b>Scx</b>           | 0.817107 | 0 | 1.7977E+308 | 2.23002E-07 |
| <b>Gm9885</b>        | 0.816067 | 0 | 1.7977E+308 | 2.69045E-14 |
| <b>Gm15539</b>       | 0.814509 | 0 | 1.7977E+308 | 0.00143732  |
| <b>Gm16588</b>       | 0.812329 | 0 | 1.7977E+308 | 0.0342714   |
| <b>Krt77</b>         | 0.810933 | 0 | 1.7977E+308 | 4.01831E-19 |
| <b>Crip3</b>         | 0.808089 | 0 | 1.7977E+308 | 0.0322591   |
| <b>Nxph4</b>         | 0.807322 | 0 | 1.7977E+308 | 8.66524E-11 |
| <b>Eya4</b>          | 0.802153 | 0 | 1.7977E+308 | 1.62138E-26 |
| <b>March10</b>       | 0.800456 | 0 | 1.7977E+308 | 0.00165649  |
| <b>Gm14164</b>       | 0.800434 | 0 | 1.7977E+308 | 7.36397E-13 |
| <b>Gm11851</b>       | 0.790571 | 0 | 1.7977E+308 | 0.000393036 |
| <b>Pcdhb13</b>       | 0.789323 | 0 | 1.7977E+308 | 8.88971E-23 |
| <b>4922501L14Rik</b> | 0.786296 | 0 | 1.7977E+308 | 8.67149E-12 |
| <b>Cidea</b>         | 0.783569 | 0 | 1.7977E+308 | 3.15031E-07 |
| <b>Tmem54</b>        | 0.782504 | 0 | 1.7977E+308 | 1.68514E-06 |
| <b>Npff</b>          | 0.776308 | 0 | 1.7977E+308 | 0.014004    |
| <b>D930015M05Rik</b> | 0.774095 | 0 | 1.7977E+308 | 2.09975E-07 |
| <b>Gm15723</b>       | 0.77291  | 0 | 1.7977E+308 | 0.00111878  |
| <b>Gm12446</b>       | 0.770239 | 0 | 1.7977E+308 | 0.000392308 |
| <b>Gm15576</b>       | 0.769115 | 0 | 1.7977E+308 | 0.00358401  |

|                      |          |   |             |             |
|----------------------|----------|---|-------------|-------------|
| <b>Gm15991</b>       | 0.768885 | 0 | 1.7977E+308 | 9.40651E-06 |
| <b>Ccnjl</b>         | 0.760724 | 0 | 1.7977E+308 | 0.0150108   |
| <b>Gm10308</b>       | 0.759356 | 0 | 1.7977E+308 | 0.000177697 |
| <b>A330008L17Rik</b> | 0.758069 | 0 | 1.7977E+308 | 2.43766E-19 |
| <b>Gm12709</b>       | 0.757336 | 0 | 1.7977E+308 | 1.23564E-11 |
| <b>Dlx2</b>          | 0.755974 | 0 | 1.7977E+308 | 4.68215E-05 |
| <b>Ankrd55</b>       | 0.751084 | 0 | 1.7977E+308 | 2.89111E-11 |
| <b>Gm14276</b>       | 0.747888 | 0 | 1.7977E+308 | 0.000852649 |
| <b>Gm16596</b>       | 0.738499 | 0 | 1.7977E+308 | 6.05562E-09 |
| <b>Gm14738</b>       | 0.737793 | 0 | 1.7977E+308 | 1.30926E-14 |
| <b>Zfp300</b>        | 0.73643  | 0 | 1.7977E+308 | 7.69481E-09 |
| <b>Gm17594</b>       | 0.73626  | 0 | 1.7977E+308 | 6.3258E-13  |
| <b>A230009B12Rik</b> | 0.733934 | 0 | 1.7977E+308 | 5.33073E-05 |
| <b>Cntnap3</b>       | 0.730586 | 0 | 1.7977E+308 | 1.93236E-26 |
| <b>Nkain2</b>        | 0.730238 | 0 | 1.7977E+308 | 0.00385753  |
| <b>Gm10742</b>       | 0.72708  | 0 | 1.7977E+308 | 6.49437E-20 |
| <b>Bhlha9</b>        | 0.724361 | 0 | 1.7977E+308 | 4.98677E-07 |
| <b>Npy2r</b>         | 0.712763 | 0 | 1.7977E+308 | 1.89756E-11 |
| <b>Samd3</b>         | 0.710868 | 0 | 1.7977E+308 | 3.37086E-10 |
| <b>Wnk1</b>          | 0.707775 | 0 | 1.7977E+308 | 4.03488E-06 |
| <b>Fau-ps2</b>       | 0.706281 | 0 | 1.7977E+308 | 0.0416838   |
| <b>Lypd2</b>         | 0.70451  | 0 | 1.7977E+308 | 0.00768037  |
| <b>Pcdhb8</b>        | 0.701929 | 0 | 1.7977E+308 | 5.08594E-13 |
| <b>L3mbtl1</b>       | 0.701733 | 0 | 1.7977E+308 | 0.00855715  |
| <b>Btbd8</b>         | 0.701313 | 0 | 1.7977E+308 | 1.28246E-06 |
| <b>Kiss1</b>         | 0.697589 | 0 | 1.7977E+308 | 0.000353123 |
| <b>Cdh24</b>         | 0.697185 | 0 | 1.7977E+308 | 1.79608E-15 |
| <b>Allc</b>          | 0.692781 | 0 | 1.7977E+308 | 7.93574E-08 |
| <b>Gm5468</b>        | 0.687998 | 0 | 1.7977E+308 | 0.00102322  |
| <b>6330409D20Rik</b> | 0.686926 | 0 | 1.7977E+308 | 2.33789E-05 |
| <b>Gm11508</b>       | 0.684321 | 0 | 1.7977E+308 | 0.0210194   |
| <b>Gm9089</b>        | 0.683894 | 0 | 1.7977E+308 | 0.0063277   |
| <b>Gm13999</b>       | 0.681256 | 0 | 1.7977E+308 | 3.13901E-05 |
| <b>Foxf2</b>         | 0.677916 | 0 | 1.7977E+308 | 7.40863E-13 |
| <b>Ntsr1</b>         | 0.676941 | 0 | 1.7977E+308 | 2.73695E-17 |
| <b>F2r12</b>         | 0.673579 | 0 | 1.7977E+308 | 8.90416E-14 |
| <b>Klhl33</b>        | 0.671204 | 0 | 1.7977E+308 | 1.03942E-08 |
| <b>Sh3d2c-ps1</b>    | 0.669779 | 0 | 1.7977E+308 | 5.16342E-05 |
| <b>Gm16938</b>       | 0.668485 | 0 | 1.7977E+308 | 1.14012E-05 |
| <b>Pcdhb6</b>        | 0.667636 | 0 | 1.7977E+308 | 7.63823E-15 |
| <b>Cstl1</b>         | 0.667547 | 0 | 1.7977E+308 | 0.0430784   |
| <b>Gm15867</b>       | 0.667174 | 0 | 1.7977E+308 | 0.00300199  |
| <b>Gm13334</b>       | 0.659711 | 0 | 1.7977E+308 | 0.0014843   |
| <b>Gm12963</b>       | 0.65934  | 0 | 1.7977E+308 | 0.0364146   |
| <b>1700080G11Rik</b> | 0.656683 | 0 | 1.7977E+308 | 0.0284519   |
| <b>2310002J15Rik</b> | 0.656111 | 0 | 1.7977E+308 | 0.000134536 |

|                      |          |   |             |             |
|----------------------|----------|---|-------------|-------------|
| <b>Gm15415</b>       | 0.65382  | 0 | 1.7977E+308 | 1.98673E-06 |
| <b>Gm15246</b>       | 0.652323 | 0 | 1.7977E+308 | 0.0089734   |
| <b>5830418P13Rik</b> | 0.652121 | 0 | 1.7977E+308 | 0.00507247  |
| <b>Pomc</b>          | 0.652046 | 0 | 1.7977E+308 | 1.82609E-05 |
| <b>4922502B01Rik</b> | 0.651631 | 0 | 1.7977E+308 | 2.31678E-07 |
| <b>9330171B17Rik</b> | 0.650352 | 0 | 1.7977E+308 | 2.40967E-10 |
| <b>A230006K03Rik</b> | 0.648426 | 0 | 1.7977E+308 | 0.000094886 |
| <b>4930579G18Rik</b> | 0.647051 | 0 | 1.7977E+308 | 3.28307E-05 |
| <b>1700013F07Rik</b> | 0.646375 | 0 | 1.7977E+308 | 0.00661656  |
| <b>BC022960</b>      | 0.645876 | 0 | 1.7977E+308 | 1.68435E-09 |
| <b>9130019P16Rik</b> | 0.642225 | 0 | 1.7977E+308 | 5.48744E-13 |
| <b>A930035D04Rik</b> | 0.641214 | 0 | 1.7977E+308 | 0.00672866  |
| <b>Asb2</b>          | 0.639278 | 0 | 1.7977E+308 | 0.0137256   |
| <b>Gm973</b>         | 0.639172 | 0 | 1.7977E+308 | 1.27139E-18 |
| <b>Gm12523</b>       | 0.63686  | 0 | 1.7977E+308 | 0.00326268  |
| <b>Gm14637</b>       | 0.635137 | 0 | 1.7977E+308 | 0.0284519   |
| <b>A230006K03Rik</b> | 0.63479  | 0 | 1.7977E+308 | 5.51455E-12 |
| <b>Dcc</b>           | 0.633921 | 0 | 1.7977E+308 | 4.12556E-26 |
| <b>D630008O14Rik</b> | 0.631797 | 0 | 1.7977E+308 | 2.45468E-05 |
| <b>Dnjb3</b>         | 0.631784 | 0 | 1.7977E+308 | 2.61271E-05 |
| <b>Gm16894</b>       | 0.631367 | 0 | 1.7977E+308 | 0.000210848 |
| <b>Cldn22</b>        | 0.629818 | 0 | 1.7977E+308 | 2.93199E-05 |
| <b>P4ha3</b>         | 0.628383 | 0 | 1.7977E+308 | 3.45545E-12 |
| <b>1700028P14Rik</b> | 0.624894 | 0 | 1.7977E+308 | 0.000143709 |
| <b>Gm13293</b>       | 0.6237   | 0 | 1.7977E+308 | 0.00201463  |
| <b>Gm17733</b>       | 0.623384 | 0 | 1.7977E+308 | 4.49526E-05 |
| <b>Pcdhb2</b>        | 0.621999 | 0 | 1.7977E+308 | 6.05945E-14 |
| <b>Gm16049</b>       | 0.621059 | 0 | 1.7977E+308 | 0.0108691   |
| <b>A930012L18Rik</b> | 0.620442 | 0 | 1.7977E+308 | 6.01441E-12 |
| <b>Hfe2</b>          | 0.62028  | 0 | 1.7977E+308 | 3.02561E-10 |
| <b>1700112D23Rik</b> | 0.619599 | 0 | 1.7977E+308 | 0.00851367  |
| <b>DII3</b>          | 0.618378 | 0 | 1.7977E+308 | 0.00175918  |
| <b>Gm6970</b>        | 0.6138   | 0 | 1.7977E+308 | 0.0025037   |
| <b>Gm4134</b>        | 0.612432 | 0 | 1.7977E+308 | 0.00648269  |
| <b>Fam184b</b>       | 0.610352 | 0 | 1.7977E+308 | 1.55696E-20 |
| <b>4930579K19Rik</b> | 0.610341 | 0 | 1.7977E+308 | 0.0023359   |
| <b>Gm10570</b>       | 0.610238 | 0 | 1.7977E+308 | 0.0125942   |
| <b>Gan</b>           | 0.609254 | 0 | 1.7977E+308 | 1.91115E-14 |
| <b>Mzf1</b>          | 0.606575 | 0 | 1.7977E+308 | 4.44354E-13 |
| <b>Gm16661</b>       | 0.605932 | 0 | 1.7977E+308 | 1.98022E-06 |
| <b>Shh</b>           | 0.603878 | 0 | 1.7977E+308 | 4.64223E-13 |
| <b>Tph2</b>          | 0.60215  | 0 | 1.7977E+308 | 5.56749E-13 |
| <b>C030005K06Rik</b> | 0.601874 | 0 | 1.7977E+308 | 0.00689524  |
| <b>Casq1</b>         | 0.59431  | 0 | 1.7977E+308 | 0.00143116  |
| <b>4932441J04Rik</b> | 0.592208 | 0 | 1.7977E+308 | 0.000982274 |
| <b>2410080I02Rik</b> | 0.588931 | 0 | 1.7977E+308 | 0.0347946   |

|                      |          |   |             |             |
|----------------------|----------|---|-------------|-------------|
| <b>Drd2</b>          | 0.58823  | 0 | 1.7977E+308 | 4.08217E-12 |
| <b>Gm10532</b>       | 0.586352 | 0 | 1.7977E+308 | 5.00106E-11 |
| <b>A930015D03Rik</b> | 0.583594 | 0 | 1.7977E+308 | 0.0057541   |
| <b>Lor</b>           | 0.580325 | 0 | 1.7977E+308 | 1.70862E-08 |
| <b>Gm9801</b>        | 0.580038 | 0 | 1.7977E+308 | 0.0404771   |
| <b>Gm13523</b>       | 0.577752 | 0 | 1.7977E+308 | 0.0195208   |
| <b>Gm16731</b>       | 0.577528 | 0 | 1.7977E+308 | 0.000145957 |
| <b>D830050J10Rik</b> | 0.576913 | 0 | 1.7977E+308 | 0.0163936   |
| <b>4930578N16Rik</b> | 0.57679  | 0 | 1.7977E+308 | 7.08854E-07 |
| <b>Trhr</b>          | 0.573382 | 0 | 1.7977E+308 | 5.44077E-13 |
| <b>Gm11274</b>       | 0.572997 | 0 | 1.7977E+308 | 0.023446    |
| <b>Gm15156</b>       | 0.570794 | 0 | 1.7977E+308 | 0.0375742   |
| <b>Gm16739</b>       | 0.570281 | 0 | 1.7977E+308 | 0.042639    |
| <b>D030055H07Rik</b> | 0.569745 | 0 | 1.7977E+308 | 0.00181064  |
| <b>Gm11802</b>       | 0.569214 | 0 | 1.7977E+308 | 0.00284218  |
| <b>6820408C15Rik</b> | 0.566786 | 0 | 1.7977E+308 | 0.00530412  |
| <b>Krt9</b>          | 0.566499 | 0 | 1.7977E+308 | 4.85811E-12 |
| <b>Cyp2j12</b>       | 0.564319 | 0 | 1.7977E+308 | 6.02346E-08 |
| <b>C030019I05Rik</b> | 0.56404  | 0 | 1.7977E+308 | 1.32275E-10 |
| <b>Npsr1</b>         | 0.562837 | 0 | 1.7977E+308 | 0.00120474  |
| <b>Cpxm2</b>         | 0.56089  | 0 | 1.7977E+308 | 0.0109318   |
| <b>Gm15672</b>       | 0.560477 | 0 | 1.7977E+308 | 8.49247E-06 |
| <b>Gm5959</b>        | 0.556549 | 0 | 1.7977E+308 | 0.0419694   |
| <b>8030443G20Rik</b> | 0.553006 | 0 | 1.7977E+308 | 0.000254053 |
| <b>Gm16684</b>       | 0.551152 | 0 | 1.7977E+308 | 0.000063969 |
| <b>Gm16705</b>       | 0.547489 | 0 | 1.7977E+308 | 1.2716E-09  |
| <b>Gm11149</b>       | 0.547017 | 0 | 1.7977E+308 | 8.19263E-06 |
| <b>Zar1l</b>         | 0.547007 | 0 | 1.7977E+308 | 0.000346342 |
| <b>Gm11730</b>       | 0.546359 | 0 | 1.7977E+308 | 0.00744665  |
| <b>Gm15870</b>       | 0.545167 | 0 | 1.7977E+308 | 0.004989    |
| <b>Pcdhb21</b>       | 0.540782 | 0 | 1.7977E+308 | 1.25092E-20 |
| <b>Stac3</b>         | 0.539332 | 0 | 1.7977E+308 | 0.0266249   |
| <b>4922502B01Rik</b> | 0.537199 | 0 | 1.7977E+308 | 1.22954E-05 |
| <b>Batf3</b>         | 0.536778 | 0 | 1.7977E+308 | 0.00242938  |
| <b>Lemd1</b>         | 0.536057 | 0 | 1.7977E+308 | 0.000211979 |
| <b>4930579G22Rik</b> | 0.534589 | 0 | 1.7977E+308 | 0.00596449  |
| <b>Gm15384</b>       | 0.534421 | 0 | 1.7977E+308 | 0.0204654   |
| <b>Fam83d</b>        | 0.53253  | 0 | 1.7977E+308 | 7.16824E-10 |
| <b>Gm4211</b>        | 0.529705 | 0 | 1.7977E+308 | 6.28375E-10 |
| <b>Gm17193</b>       | 0.529636 | 0 | 1.7977E+308 | 0.00262099  |
| <b>Insl5</b>         | 0.528443 | 0 | 1.7977E+308 | 0.046773    |
| <b>4931415C17Rik</b> | 0.526705 | 0 | 1.7977E+308 | 2.33213E-07 |
| <b>Gm14873</b>       | 0.525934 | 0 | 1.7977E+308 | 0.0103545   |
| <b>Dusp13</b>        | 0.525765 | 0 | 1.7977E+308 | 0.00502917  |
| <b>4930500J02Rik</b> | 0.525315 | 0 | 1.7977E+308 | 0.0495142   |
| <b>Gm12691</b>       | 0.524965 | 0 | 1.7977E+308 | 0.0392312   |

|                      |          |   |             |             |
|----------------------|----------|---|-------------|-------------|
| <b>Gm14286</b>       | 0.524164 | 0 | 1.7977E+308 | 0.03439     |
| <b>Zcwpw2</b>        | 0.522714 | 0 | 1.7977E+308 | 0.0275794   |
| <b>3110099E03Rik</b> | 0.522616 | 0 | 1.7977E+308 | 0.00849035  |
| <b>Gm15552</b>       | 0.521556 | 0 | 1.7977E+308 | 2.82782E-06 |
| <b>4930512B01Rik</b> | 0.518688 | 0 | 1.7977E+308 | 4.68908E-08 |
| <b>Rtbdn</b>         | 0.518599 | 0 | 1.7977E+308 | 1.82324E-05 |
| <b>Zfp879</b>        | 0.517612 | 0 | 1.7977E+308 | 2.93729E-10 |
| <b>Gm15676</b>       | 0.516769 | 0 | 1.7977E+308 | 0.0011035   |
| <b>AI115009</b>      | 0.515767 | 0 | 1.7977E+308 | 3.81052E-08 |
| <b>Gm13744</b>       | 0.513646 | 0 | 1.7977E+308 | 0.000726479 |
| <b>Cdsn</b>          | 0.513266 | 0 | 1.7977E+308 | 1.91361E-11 |
| <b>Gm17614</b>       | 0.509806 | 0 | 1.7977E+308 | 2.55231E-05 |
| <b>E130006D01Rik</b> | 0.508612 | 0 | 1.7977E+308 | 0.0229928   |
| <b>Thpo</b>          | 0.502443 | 0 | 1.7977E+308 | 6.56883E-07 |
| <b>Ky</b>            | 0.501228 | 0 | 1.7977E+308 | 9.38688E-14 |
| <b>Gm3696</b>        | 0.498296 | 0 | 1.7977E+308 | 0.0106424   |
| <b>Gm13830</b>       | 0.494183 | 0 | 1.7977E+308 | 0.0435651   |
| <b>2410076I21Rik</b> | 0.490203 | 0 | 1.7977E+308 | 0.000703528 |
| <b>Zglp1</b>         | 0.489224 | 0 | 1.7977E+308 | 0.000193578 |
| <b>Colq</b>          | 0.487335 | 0 | 1.7977E+308 | 0.0189547   |
| <b>Atoh7</b>         | 0.487248 | 0 | 1.7977E+308 | 0.0404771   |
| <b>Gm16044</b>       | 0.485413 | 0 | 1.7977E+308 | 0.0411005   |
| <b>Mc4r</b>          | 0.485139 | 0 | 1.7977E+308 | 3.55643E-11 |
| <b>Hbq1a</b>         | 0.484108 | 0 | 1.7977E+308 | 0.0107123   |
| <b>Gm3020</b>        | 0.481748 | 0 | 1.7977E+308 | 1.15597E-07 |
| <b>Gm14125</b>       | 0.48108  | 0 | 1.7977E+308 | 0.00514544  |
| <b>Galnt5</b>        | 0.479916 | 0 | 1.7977E+308 | 3.20041E-15 |
| <b>Gm17566</b>       | 0.478484 | 0 | 1.7977E+308 | 0.00147907  |
| <b>Nmbr</b>          | 0.478174 | 0 | 1.7977E+308 | 3.18298E-05 |
| <b>Dydc2</b>         | 0.477647 | 0 | 1.7977E+308 | 0.0292813   |
| <b>Slc9a2</b>        | 0.476243 | 0 | 1.7977E+308 | 7.66998E-14 |
| <b>1700001G11Rik</b> | 0.475747 | 0 | 1.7977E+308 | 0.00439515  |
| <b>0610040F04Rik</b> | 0.475143 | 0 | 1.7977E+308 | 5.10056E-07 |
| <b>Gm5897</b>        | 0.475116 | 0 | 1.7977E+308 | 9.56168E-06 |
| <b>Gm16866</b>       | 0.474214 | 0 | 1.7977E+308 | 3.55132E-10 |
| <b>Gm12748</b>       | 0.473794 | 0 | 1.7977E+308 | 0.0405748   |
| <b>A730035I17Rik</b> | 0.473351 | 0 | 1.7977E+308 | 0.00769418  |
| <b>Gm14606</b>       | 0.473295 | 0 | 1.7977E+308 | 0.000103827 |
| <b>Gm14246</b>       | 0.472333 | 0 | 1.7977E+308 | 0.00552172  |
| <b>Gm16638</b>       | 0.46964  | 0 | 1.7977E+308 | 1.90946E-07 |
| <b>Cbln1</b>         | 0.468149 | 0 | 1.7977E+308 | 0.000496356 |
| <b>Gm14932</b>       | 0.466287 | 0 | 1.7977E+308 | 0.0461956   |
| <b>Cldn24</b>        | 0.46483  | 0 | 1.7977E+308 | 0.00826669  |
| <b>RP23-191I16.2</b> | 0.463282 | 0 | 1.7977E+308 | 0.000365242 |
| <b>4930430E12Rik</b> | 0.463172 | 0 | 1.7977E+308 | 0.00386222  |
| <b>Rel</b>           | 0.462907 | 0 | 1.7977E+308 | 8.91155E-11 |

|                      |          |   |             |             |
|----------------------|----------|---|-------------|-------------|
| <b>Gm13524</b>       | 0.462447 | 0 | 1.7977E+308 | 0.00555795  |
| <b>1700022N22Rik</b> | 0.462437 | 0 | 1.7977E+308 | 0.00404713  |
| <b>Ccdc87</b>        | 0.461634 | 0 | 1.7977E+308 | 3.87145E-12 |
| <b>Gm7271</b>        | 0.460092 | 0 | 1.7977E+308 | 0.0372461   |
| <b>S100a3</b>        | 0.459726 | 0 | 1.7977E+308 | 0.00404713  |
| <b>2700069I18Rik</b> | 0.456158 | 0 | 1.7977E+308 | 0.00206703  |
| <b>Gm13709</b>       | 0.4556   | 0 | 1.7977E+308 | 0.0136344   |
| <b>Gm16958</b>       | 0.451511 | 0 | 1.7977E+308 | 0.00161773  |
| <b>Ttc34</b>         | 0.450768 | 0 | 1.7977E+308 | 0.00979822  |
| <b>Gm17715</b>       | 0.450206 | 0 | 1.7977E+308 | 1.05762E-11 |
| <b>Gm14575</b>       | 0.45009  | 0 | 1.7977E+308 | 0.0226447   |
| <b>Gm12908</b>       | 0.449495 | 0 | 1.7977E+308 | 7.4268E-07  |
| <b>Frmd4a</b>        | 0.44885  | 0 | 1.7977E+308 | 3.90642E-13 |
| <b>Mei1</b>          | 0.447828 | 0 | 1.7977E+308 | 1.98935E-15 |
| <b>5430402O13Rik</b> | 0.447466 | 0 | 1.7977E+308 | 0.00158785  |
| <b>Chrn3</b>         | 0.447016 | 0 | 1.7977E+308 | 9.28705E-17 |
| <b>Gm5602</b>        | 0.446321 | 0 | 1.7977E+308 | 7.72694E-07 |
| <b>Vmn2r-ps19</b>    | 0.443772 | 0 | 1.7977E+308 | 0.0247993   |
| <b>Gm17396</b>       | 0.441244 | 0 | 1.7977E+308 | 2.87635E-06 |
| <b>Gm16577</b>       | 0.440745 | 0 | 1.7977E+308 | 0.043977    |
| <b>Tnni2</b>         | 0.438097 | 0 | 1.7977E+308 | 0.00537995  |
| <b>Gm14042</b>       | 0.437046 | 0 | 1.7977E+308 | 0.00229271  |
| <b>Gm16899</b>       | 0.436399 | 0 | 1.7977E+308 | 0.000128658 |
| <b>4921515J06Rik</b> | 0.436255 | 0 | 1.7977E+308 | 4.52114E-06 |
| <b>Gm15932</b>       | 0.43498  | 0 | 1.7977E+308 | 0.0375203   |
| <b>Gm10638</b>       | 0.433958 | 0 | 1.7977E+308 | 0.00125536  |
| <b>Btn2a2</b>        | 0.433124 | 0 | 1.7977E+308 | 1.22067E-07 |
| <b>Gm11834</b>       | 0.430442 | 0 | 1.7977E+308 | 0.0197732   |
| <b>Gm9974</b>        | 0.429334 | 0 | 1.7977E+308 | 0.00598591  |
| <b>Gm14267</b>       | 0.429089 | 0 | 1.7977E+308 | 0.0224953   |
| <b>Cpsf4l</b>        | 0.428562 | 0 | 1.7977E+308 | 0.000597824 |
| <b>Wnt6</b>          | 0.426473 | 0 | 1.7977E+308 | 1.81763E-07 |
| <b>Gm15537</b>       | 0.426331 | 0 | 1.7977E+308 | 0.0408621   |
| <b>Gm17641</b>       | 0.425779 | 0 | 1.7977E+308 | 1.61626E-08 |
| <b>Gpr1</b>          | 0.424563 | 0 | 1.7977E+308 | 5.67559E-07 |
| <b>6530411M01Rik</b> | 0.421126 | 0 | 1.7977E+308 | 0.000626129 |
| <b>Asxl3</b>         | 0.419233 | 0 | 1.7977E+308 | 3.0866E-33  |
| <b>lqcj</b>          | 0.418935 | 0 | 1.7977E+308 | 7.2228E-06  |
| <b>BC023719</b>      | 0.418802 | 0 | 1.7977E+308 | 0.000939909 |
| <b>4930500F10Rik</b> | 0.417183 | 0 | 1.7977E+308 | 0.00802666  |
| <b>9030612E09Rik</b> | 0.415405 | 0 | 1.7977E+308 | 8.38203E-07 |
| <b>Zfp708</b>        | 0.414702 | 0 | 1.7977E+308 | 4.10709E-05 |
| <b>Cbx3-ps3</b>      | 0.414649 | 0 | 1.7977E+308 | 0.0270597   |
| <b>Gm15513</b>       | 0.413478 | 0 | 1.7977E+308 | 1.10255E-05 |
| <b>Ldoc1</b>         | 0.412463 | 0 | 1.7977E+308 | 5.79042E-05 |
| <b>Gm14257</b>       | 0.411464 | 0 | 1.7977E+308 | 0.0044901   |



|                      |          |   |             |             |
|----------------------|----------|---|-------------|-------------|
| <b>Gm15379</b>       | 0.411377 | 0 | 1.7977E+308 | 0.0157235   |
| <b>Gm15135</b>       | 0.411214 | 0 | 1.7977E+308 | 0.018295    |
| <b>Morn5</b>         | 0.409892 | 0 | 1.7977E+308 | 0.00972035  |
| <b>Ccdc129</b>       | 0.409262 | 0 | 1.7977E+308 | 8.11892E-11 |
| <b>Aspg</b>          | 0.408611 | 0 | 1.7977E+308 | 1.40499E-09 |
| <b>Timp1</b>         | 0.406766 | 0 | 1.7977E+308 | 0.00288402  |
| <b>RP23-32K16.4</b>  | 0.406761 | 0 | 1.7977E+308 | 0.0372755   |
| <b>Gm5887</b>        | 0.405978 | 0 | 1.7977E+308 | 0.000406592 |
| <b>Emx2os</b>        | 0.404367 | 0 | 1.7977E+308 | 5.30128E-17 |
| <b>Slc23a3</b>       | 0.403531 | 0 | 1.7977E+308 | 6.15641E-07 |
| <b>Fos1</b>          | 0.403033 | 0 | 1.7977E+308 | 3.94345E-06 |
| <b>Gm12353</b>       | 0.402806 | 0 | 1.7977E+308 | 0.0423172   |
| <b>Gm14081</b>       | 0.402592 | 0 | 1.7977E+308 | 0.0329195   |
| <b>Gm8778</b>        | 0.401438 | 0 | 1.7977E+308 | 0.0177013   |
| <b>Gm8410</b>        | 0.399581 | 0 | 1.7977E+308 | 0.0227844   |
| <b>Cntnap5c</b>      | 0.399274 | 0 | 1.7977E+308 | 3.77166E-13 |
| <b>Gm17357</b>       | 0.398889 | 0 | 1.7977E+308 | 2.5981E-08  |
| <b>CK137956</b>      | 0.398473 | 0 | 1.7977E+308 | 5.17945E-08 |
| <b>Hbq1b</b>         | 0.397645 | 0 | 1.7977E+308 | 0.0281715   |
| <b>E030013I19Rik</b> | 0.396926 | 0 | 1.7977E+308 | 4.10735E-07 |
| <b>Gm16957</b>       | 0.39569  | 0 | 1.7977E+308 | 5.05083E-08 |
| <b>A830011K09Rik</b> | 0.395227 | 0 | 1.7977E+308 | 2.68651E-06 |
| <b>Krt73</b>         | 0.394061 | 0 | 1.7977E+308 | 2.50065E-07 |
| <b>Sec1415</b>       | 0.393954 | 0 | 1.7977E+308 | 5.67669E-08 |
| <b>4933428G20Rik</b> | 0.39358  | 0 | 1.7977E+308 | 5.61085E-05 |
| <b>Olf316</b>        | 0.392941 | 0 | 1.7977E+308 | 0.00124708  |
| <b>E130215H24Rik</b> | 0.391319 | 0 | 1.7977E+308 | 0.00144014  |
| <b>Gm12404</b>       | 0.391135 | 0 | 1.7977E+308 | 9.09928E-06 |
| <b>Zfp389</b>        | 0.39063  | 0 | 1.7977E+308 | 0.0150697   |
| <b>Gm3164</b>        | 0.390557 | 0 | 1.7977E+308 | 0.0475926   |
| <b>Lin28b</b>        | 0.389782 | 0 | 1.7977E+308 | 1.25203E-12 |
| <b>Gm16990</b>       | 0.389755 | 0 | 1.7977E+308 | 8.17114E-10 |
| <b>1700121F15Rik</b> | 0.389513 | 0 | 1.7977E+308 | 0.00789953  |
| <b>Gm17628</b>       | 0.389251 | 0 | 1.7977E+308 | 0.00141943  |
| <b>1700023F06Rik</b> | 0.388263 | 0 | 1.7977E+308 | 0.000559439 |
| <b>Ccdc42</b>        | 0.386543 | 0 | 1.7977E+308 | 0.00367877  |
| <b>Gm13005</b>       | 0.386005 | 0 | 1.7977E+308 | 0.023822    |
| <b>A930006K02Rik</b> | 0.385952 | 0 | 1.7977E+308 | 0.00643846  |
| <b>4933402D24Rik</b> | 0.384816 | 0 | 1.7977E+308 | 5.22804E-06 |
| <b>Cdk15</b>         | 0.383821 | 0 | 1.7977E+308 | 0.015768    |
| <b>1700109K24Rik</b> | 0.382272 | 0 | 1.7977E+308 | 0.00107018  |
| <b>1700029J07Rik</b> | 0.381282 | 0 | 1.7977E+308 | 0.000115827 |
| <b>Olf464</b>        | 0.379158 | 0 | 1.7977E+308 | 0.001067    |
| <b>Nhs</b>           | 0.378975 | 0 | 1.7977E+308 | 1.11797E-25 |
| <b>Wnt16</b>         | 0.378673 | 0 | 1.7977E+308 | 3.53772E-07 |
| <b>Gm9945</b>        | 0.376724 | 0 | 1.7977E+308 | 0.00235213  |

|                      |          |   |             |             |
|----------------------|----------|---|-------------|-------------|
| <b>Gm17593</b>       | 0.373541 | 0 | 1.7977E+308 | 0.000104448 |
| <b>Il1a</b>          | 0.373416 | 0 | 1.7977E+308 | 2.18767E-06 |
| <b>Gm5319</b>        | 0.371817 | 0 | 1.7977E+308 | 0.00374851  |
| <b>C130040N14Rik</b> | 0.371798 | 0 | 1.7977E+308 | 0.000627106 |
| <b>Gm17702</b>       | 0.370905 | 0 | 1.7977E+308 | 0.00173868  |
| <b>Mme11</b>         | 0.37068  | 0 | 1.7977E+308 | 0.0117056   |
| <b>Nkx3-1</b>        | 0.370635 | 0 | 1.7977E+308 | 3.84534E-10 |
| <b>Ucma</b>          | 0.370561 | 0 | 1.7977E+308 | 0.0117218   |
| <b>2310002F09Rik</b> | 0.366908 | 0 | 1.7977E+308 | 0.000975267 |
| <b>Pth2r</b>         | 0.36672  | 0 | 1.7977E+308 | 1.03059E-07 |
| <b>A930003A15Rik</b> | 0.3663   | 0 | 1.7977E+308 | 0.00917204  |
| <b>Gm16534</b>       | 0.366209 | 0 | 1.7977E+308 | 0.0123187   |
| <b>Lgr6</b>          | 0.365238 | 0 | 1.7977E+308 | 0.0363307   |
| <b>Gm5403</b>        | 0.365005 | 0 | 1.7977E+308 | 8.21375E-09 |
| <b>Gm13327</b>       | 0.36423  | 0 | 1.7977E+308 | 1.12119E-08 |
| <b>Ebi3</b>          | 0.364003 | 0 | 1.7977E+308 | 0.000577192 |
| <b>Gm15201</b>       | 0.363698 | 0 | 1.7977E+308 | 0.000345494 |
| <b>Gpr6</b>          | 0.363155 | 0 | 1.7977E+308 | 9.07186E-06 |
| <b>Gm14966</b>       | 0.362034 | 0 | 1.7977E+308 | 0.0222398   |
| <b>Cd160</b>         | 0.361388 | 0 | 1.7977E+308 | 8.89938E-08 |
| <b>B930082K07Rik</b> | 0.36138  | 0 | 1.7977E+308 | 6.87322E-08 |
| <b>Twist2</b>        | 0.361068 | 0 | 1.7977E+308 | 0.00020255  |
| <b>C530025M09Rik</b> | 0.359721 | 0 | 1.7977E+308 | 0.0137183   |
| <b>Gm960</b>         | 0.35957  | 0 | 1.7977E+308 | 1.38197E-06 |
| <b>Gm1604A</b>       | 0.357501 | 0 | 1.7977E+308 | 0.0150697   |
| <b>Gm1604b</b>       | 0.357501 | 0 | 1.7977E+308 | 0.0150697   |
| <b>Gm15839</b>       | 0.357301 | 0 | 1.7977E+308 | 0.0367024   |
| <b>Epyc</b>          | 0.356902 | 0 | 1.7977E+308 | 8.43512E-06 |
| <b>Acbd7</b>         | 0.356348 | 0 | 1.7977E+308 | 0.0461956   |
| <b>Gm16334</b>       | 0.356247 | 0 | 1.7977E+308 | 0.0138625   |
| <b>1700003D09Rik</b> | 0.354905 | 0 | 1.7977E+308 | 0.000121162 |
| <b>Gm8396</b>        | 0.354573 | 0 | 1.7977E+308 | 0.0068203   |
| <b>1110035H17Rik</b> | 0.354518 | 0 | 1.7977E+308 | 0.000331802 |
| <b>Aox4</b>          | 0.353599 | 0 | 1.7977E+308 | 1.07313E-14 |
| <b>A330033J07Rik</b> | 0.352915 | 0 | 1.7977E+308 | 9.96549E-07 |
| <b>Gm16583</b>       | 0.352674 | 0 | 1.7977E+308 | 0.0357498   |
| <b>Gm9767</b>        | 0.35181  | 0 | 1.7977E+308 | 0.000656252 |
| <b>1700067K01Rik</b> | 0.349451 | 0 | 1.7977E+308 | 0.00746558  |
| <b>D830025C05Rik</b> | 0.349258 | 0 | 1.7977E+308 | 0.00271597  |
| <b>Gm12930</b>       | 0.347572 | 0 | 1.7977E+308 | 0.0201518   |
| <b>B230216G23Rik</b> | 0.346091 | 0 | 1.7977E+308 | 0.000163923 |
| <b>Gm16240</b>       | 0.345924 | 0 | 1.7977E+308 | 0.0289192   |
| <b>A330040F15Rik</b> | 0.344436 | 0 | 1.7977E+308 | 0.00100246  |
| <b>Gm1614</b>        | 0.343809 | 0 | 1.7977E+308 | 5.85734E-09 |
| <b>Popdc3</b>        | 0.343253 | 0 | 1.7977E+308 | 4.94013E-05 |
| <b>Tmem149</b>       | 0.343117 | 0 | 1.7977E+308 | 0.019584    |

|                      |          |   |             |             |
|----------------------|----------|---|-------------|-------------|
| <b>Gm17382</b>       | 0.341315 | 0 | 1.7977E+308 | 7.44594E-05 |
| <b>Gm9982</b>        | 0.340805 | 0 | 1.7977E+308 | 0.000617772 |
| <b>Cysltr2</b>       | 0.339771 | 0 | 1.7977E+308 | 2.58959E-05 |
| <b>2810055G20Rik</b> | 0.339717 | 0 | 1.7977E+308 | 7.29293E-05 |
| <b>Epha8</b>         | 0.336955 | 0 | 1.7977E+308 | 2.67733E-13 |
| <b>Gm10545</b>       | 0.336689 | 0 | 1.7977E+308 | 5.0913E-14  |
| <b>Gm7148</b>        | 0.336264 | 0 | 1.7977E+308 | 0.0402524   |
| <b>4933406C10Rik</b> | 0.335565 | 0 | 1.7977E+308 | 0.000170416 |
| <b>Klhl14</b>        | 0.335059 | 0 | 1.7977E+308 | 2.2647E-11  |
| <b>Prph</b>          | 0.334416 | 0 | 1.7977E+308 | 1.93917E-05 |
| <b>Has1</b>          | 0.334039 | 0 | 1.7977E+308 | 2.64867E-06 |
| <b>Gm14717</b>       | 0.333293 | 0 | 1.7977E+308 | 0.022949    |
| <b>Gm12522</b>       | 0.332818 | 0 | 1.7977E+308 | 2.81809E-07 |
| <b>Rad51ap2</b>      | 0.331482 | 0 | 1.7977E+308 | 5.10381E-09 |
| <b>1700023E05Rik</b> | 0.33025  | 0 | 1.7977E+308 | 0.00661182  |
| <b>Gm3715</b>        | 0.330148 | 0 | 1.7977E+308 | 0.0178766   |
| <b>Gm15594</b>       | 0.329941 | 0 | 1.7977E+308 | 1.25813E-06 |
| <b>Gm12105</b>       | 0.328339 | 0 | 1.7977E+308 | 0.0129393   |
| <b>1500002F19Rik</b> | 0.328165 | 0 | 1.7977E+308 | 0.00171331  |
| <b>Sp8</b>           | 0.327603 | 0 | 1.7977E+308 | 2.70699E-08 |
| <b>Syce1l</b>        | 0.327155 | 0 | 1.7977E+308 | 0.014004    |
| <b>Gm12821</b>       | 0.326632 | 0 | 1.7977E+308 | 0.0442208   |
| <b>1700001G17Rik</b> | 0.326549 | 0 | 1.7977E+308 | 0.00732877  |
| <b>Zfp352</b>        | 0.325445 | 0 | 1.7977E+308 | 3.47704E-06 |
| <b>Gm11762</b>       | 0.32429  | 0 | 1.7977E+308 | 4.49526E-05 |
| <b>Rln1</b>          | 0.324278 | 0 | 1.7977E+308 | 0.0232662   |
| <b>C1ql2</b>         | 0.323349 | 0 | 1.7977E+308 | 6.52161E-06 |
| <b>Tpsg1</b>         | 0.323085 | 0 | 1.7977E+308 | 0.0119187   |
| <b>Optc</b>          | 0.322525 | 0 | 1.7977E+308 | 0.00190538  |
| <b>Gm14168</b>       | 0.32098  | 0 | 1.7977E+308 | 3.02533E-06 |
| <b>Gm15548</b>       | 0.320897 | 0 | 1.7977E+308 | 0.0128826   |
| <b>Gm16615</b>       | 0.320552 | 0 | 1.7977E+308 | 4.58071E-09 |
| <b>Socs1</b>         | 0.31966  | 0 | 1.7977E+308 | 0.000962867 |
| <b>Gjd3</b>          | 0.318985 | 0 | 1.7977E+308 | 0.00815921  |
| <b>Gm13054</b>       | 0.318948 | 0 | 1.7977E+308 | 0.00996191  |
| <b>Mmp8</b>          | 0.31882  | 0 | 1.7977E+308 | 7.58082E-07 |
| <b>Alk</b>           | 0.316612 | 0 | 1.7977E+308 | 4.94269E-13 |
| <b>A330070K13Rik</b> | 0.316609 | 0 | 1.7977E+308 | 0.0154034   |
| <b>G630016G05Rik</b> | 0.315965 | 0 | 1.7977E+308 | 0.0123606   |
| <b>Olftr78</b>       | 0.315552 | 0 | 1.7977E+308 | 1.13582E-07 |
| <b>Gm15328</b>       | 0.315009 | 0 | 1.7977E+308 | 2.73879E-08 |
| <b>4732440D04Rik</b> | 0.313863 | 0 | 1.7977E+308 | 0.0218292   |
| <b>Gm11821</b>       | 0.312231 | 0 | 1.7977E+308 | 0.00477727  |
| <b>D830044I16Rik</b> | 0.311554 | 0 | 1.7977E+308 | 0.00507922  |
| <b>Gm16760</b>       | 0.310626 | 0 | 1.7977E+308 | 0.000154671 |
| <b>2900041M22Rik</b> | 0.308744 | 0 | 1.7977E+308 | 4.38308E-05 |

|                      |          |   |             |             |
|----------------------|----------|---|-------------|-------------|
| <b>Gypa</b>          | 0.308182 | 0 | 1.7977E+308 | 2.78864E-05 |
| <b>Gm70</b>          | 0.307438 | 0 | 1.7977E+308 | 0.000351651 |
| <b>Olfr288</b>       | 0.307198 | 0 | 1.7977E+308 | 1.42688E-05 |
| <b>Gm9017</b>        | 0.306689 | 0 | 1.7977E+308 | 0.0262031   |
| <b>Gm17378</b>       | 0.305809 | 0 | 1.7977E+308 | 0.00639447  |
| <b>Gm7873</b>        | 0.305792 | 0 | 1.7977E+308 | 0.0189727   |
| <b>Tnfrsf17</b>      | 0.305338 | 0 | 1.7977E+308 | 0.014004    |
| <b>Gm16704</b>       | 0.305098 | 0 | 1.7977E+308 | 2.78458E-05 |
| <b>2310043M15Rik</b> | 0.303816 | 0 | 1.7977E+308 | 0.000180937 |
| <b>4930471I20Rik</b> | 0.302974 | 0 | 1.7977E+308 | 0.0297638   |
| <b>Gm17116</b>       | 0.30291  | 0 | 1.7977E+308 | 0.00430873  |
| <b>1110002E22Rik</b> | 0.300717 | 0 | 1.7977E+308 | 2.78046E-23 |
| <b>Dnd1</b>          | 0.300667 | 0 | 1.7977E+308 | 0.000513291 |
| <b>Gm11650</b>       | 0.300069 | 0 | 1.7977E+308 | 0.00177643  |
| <b>Gm15816</b>       | 0.299447 | 0 | 1.7977E+308 | 8.27424E-05 |
| <b>Gm10657</b>       | 0.296612 | 0 | 1.7977E+308 | 0.00426863  |
| <b>Clcna</b>         | 0.295795 | 0 | 1.7977E+308 | 0.0358424   |
| <b>Vmn2r87</b>       | 0.294026 | 0 | 1.7977E+308 | 7.48222E-08 |
| <b>Wfdc3</b>         | 0.293632 | 0 | 1.7977E+308 | 0.0120422   |
| <b>Agrp</b>          | 0.29336  | 0 | 1.7977E+308 | 0.038805    |
| <b>Gm20482</b>       | 0.293303 | 0 | 1.7977E+308 | 0.000113809 |
| <b>Klri1</b>         | 0.290802 | 0 | 1.7977E+308 | 0.0150697   |
| <b>Cacna2d4</b>      | 0.290499 | 0 | 1.7977E+308 | 1.74392E-12 |
| <b>Gm15688</b>       | 0.290299 | 0 | 1.7977E+308 | 2.71655E-06 |
| <b>A830031A19Rik</b> | 0.28898  | 0 | 1.7977E+308 | 0.023446    |
| <b>Mup5</b>          | 0.287871 | 0 | 1.7977E+308 | 0.0103077   |
| <b>C430049B03Rik</b> | 0.287616 | 0 | 1.7977E+308 | 0.0310619   |
| <b>Gm9901</b>        | 0.287345 | 0 | 1.7977E+308 | 0.00477727  |
| <b>9530052E02Rik</b> | 0.28682  | 0 | 1.7977E+308 | 0.00550262  |
| <b>Gm15585</b>       | 0.286134 | 0 | 1.7977E+308 | 0.039056    |
| <b>Adrb3</b>         | 0.284815 | 0 | 1.7977E+308 | 3.16019E-06 |
| <b>4930469G21Rik</b> | 0.283818 | 0 | 1.7977E+308 | 0.00191134  |
| <b>Mypn</b>          | 0.282932 | 0 | 1.7977E+308 | 1.14797E-12 |
| <b>Trpc7</b>         | 0.282734 | 0 | 1.7977E+308 | 9.8686E-07  |
| <b>Gm628</b>         | 0.282699 | 0 | 1.7977E+308 | 5.26706E-06 |
| <b>A930013B10Rik</b> | 0.282464 | 0 | 1.7977E+308 | 0.0382041   |
| <b>Lrriq1</b>        | 0.281759 | 0 | 1.7977E+308 | 1.59459E-06 |
| <b>Pnma5</b>         | 0.281447 | 0 | 1.7977E+308 | 5.33486E-07 |
| <b>2310042E22Rik</b> | 0.281394 | 0 | 1.7977E+308 | 0.00179984  |
| <b>Tbx1</b>          | 0.281092 | 0 | 1.7977E+308 | 0.000235261 |
| <b>C230030N03Rik</b> | 0.280927 | 0 | 1.7977E+308 | 0.000256748 |
| <b>A830093I24Rik</b> | 0.280361 | 0 | 1.7977E+308 | 3.40661E-07 |
| <b>Bves</b>          | 0.280126 | 0 | 1.7977E+308 | 0.000208708 |
| <b>Dnahc7b</b>       | 0.279543 | 0 | 1.7977E+308 | 1.81473E-26 |
| <b>Hapln3</b>        | 0.277747 | 0 | 1.7977E+308 | 4.0594E-08  |
| <b>1700014D04Rik</b> | 0.277561 | 0 | 1.7977E+308 | 0.0203733   |

|                      |          |   |             |             |
|----------------------|----------|---|-------------|-------------|
| <b>1700069B07Rik</b> | 0.277453 | 0 | 1.7977E+308 | 0.0154994   |
| <b>5330413P13Rik</b> | 0.277091 | 0 | 1.7977E+308 | 6.57305E-07 |
| <b>Gm15172</b>       | 0.276698 | 0 | 1.7977E+308 | 0.00651789  |
| <b>2410137M14Rik</b> | 0.276281 | 0 | 1.7977E+308 | 0.021784    |
| <b>Gm6297</b>        | 0.276268 | 0 | 1.7977E+308 | 1.92165E-05 |
| <b>Trh</b>           | 0.27361  | 0 | 1.7977E+308 | 0.0010351   |
| <b>1700060J05Rik</b> | 0.272736 | 0 | 1.7977E+308 | 0.00641492  |
| <b>Ccdc18</b>        | 0.272533 | 0 | 1.7977E+308 | 5.84892E-11 |
| <b>Gm12835</b>       | 0.271787 | 0 | 1.7977E+308 | 4.21389E-05 |
| <b>Nts</b>           | 0.270772 | 0 | 1.7977E+308 | 0.00353077  |
| <b>Pgpep1l</b>       | 0.270622 | 0 | 1.7977E+308 | 0.00786621  |
| <b>4930578M01Rik</b> | 0.270557 | 0 | 1.7977E+308 | 0.0124292   |
| <b>Npc1l1</b>        | 0.269321 | 0 | 1.7977E+308 | 1.49111E-09 |
| <b>Drd5</b>          | 0.268868 | 0 | 1.7977E+308 | 9.14542E-07 |
| <b>Xkr7</b>          | 0.268689 | 0 | 1.7977E+308 | 1.41867E-06 |
| <b>Serpine3</b>      | 0.268436 | 0 | 1.7977E+308 | 0.00108261  |

#### Pancreas specific genes

| <b>gene</b>          | <b>Cortex (FPKM)</b> | <b>Pancreas (FPKM)</b> | <b>log2 (fold change)</b> | <b>FDR</b>  |
|----------------------|----------------------|------------------------|---------------------------|-------------|
| <b>Mgl2</b>          | 0.461228             | 7.42035                | 4.00794                   | 6.57915E-07 |
| <b>Fam60a</b>        | 1.31408              | 21.1627                | 4.0094                    | 0.0161113   |
| <b>Tmem20</b>        | 0.550283             | 8.93659                | 4.02148                   | 0           |
| <b>Wfdc2</b>         | 0.924118             | 15.1183                | 4.03208                   | 5.08373E-07 |
| <b>1700112E06Rik</b> | 0.887983             | 14.5464                | 4.03399                   | 5.75197E-07 |
| <b>Hk2</b>           | 0.655921             | 10.8097                | 4.04266                   | 1.50393E-10 |
| <b>Slpi</b>          | 0.864696             | 14.2896                | 4.04663                   | 6.77888E-10 |
| <b>Gm13730</b>       | 0.374262             | 6.18767                | 4.04728                   | 0           |
| <b>Gm12612</b>       | 0.498375             | 8.33781                | 4.06436                   | 0           |
| <b>Arhgef5</b>       | 0.38395              | 6.42809                | 4.0654                    | 0           |
| <b>Ifi44</b>         | 0.493474             | 8.37438                | 4.08494                   | 1.95762E-08 |
| <b>Ccrl2</b>         | 0.340294             | 5.79007                | 4.08873                   | 0           |
| <b>Fmo2</b>          | 0.530536             | 9.08513                | 4.09798                   | 1.42369E-14 |
| <b>Gm5385</b>        | 0.498675             | 8.59814                | 4.10785                   | 0           |
| <b>Gm12626</b>       | 0.2842               | 4.90026                | 4.10788                   | 0           |
| <b>Fbln2</b>         | 0.988261             | 17.0773                | 4.11104                   | 1.70185E-12 |
| <b>Cish</b>          | 2.1274               | 37.4675                | 4.13848                   | 0           |
| <b>Gm12623</b>       | 0.524171             | 9.23253                | 4.13862                   | 0           |
| <b>Mgmt</b>          | 0.646672             | 11.42                  | 4.14238                   | 0           |
| <b>Kcp</b>           | 0.266636             | 4.7189                 | 4.14551                   | 0.000425589 |
| <b>Gm5246</b>        | 0.35056              | 6.22327                | 4.14994                   | 1.86866E-07 |
| <b>Iglv1</b>         | 0.653912             | 11.6206                | 4.15144                   | 0.00363563  |
| <b>Apol7d</b>        | 2.45978              | 43.8399                | 4.15564                   | 0           |
| <b>Antxr2</b>        | 0.38519              | 6.88419                | 4.15965                   | 0           |

|                      |          |         |         |             |
|----------------------|----------|---------|---------|-------------|
| <b>Lox11</b>         | 0.403302 | 7.20875 | 4.15982 | 9.1268E-15  |
| <b>2310001H17Rik</b> | 0.198861 | 3.56829 | 4.1654  | 0.00014918  |
| <b>D17H6S56E-5</b>   | 1.01376  | 18.3976 | 4.18173 | 0           |
| <b>Gm12620</b>       | 0.544253 | 9.9342  | 4.19006 | 0           |
| <b>Bst2</b>          | 2.60895  | 47.8487 | 4.19694 | 0           |
| <b>Cfb</b>           | 0.655374 | 12.0398 | 4.19935 | 7.33229E-12 |
| <b>Gm17423</b>       | 0.252718 | 4.66782 | 4.20715 | 0           |
| <b>Sdc1</b>          | 0.38918  | 7.18982 | 4.20745 | 2.7264E-08  |
| <b>Fcna</b>          | 0.366323 | 6.77842 | 4.20976 | 6.33237E-08 |
| <b>Tstd1</b>         | 0.231821 | 4.31295 | 4.21759 | 0.000836733 |
| <b>Igkv19-93</b>     | 0.999434 | 18.628  | 4.22021 | 1.77874E-06 |
| <b>Lad1</b>          | 0.278576 | 5.23143 | 4.23106 | 0           |
| <b>Sgms2</b>         | 0.504638 | 9.49459 | 4.23378 | 0           |
| <b>Zbtb42</b>        | 0.545386 | 10.2911 | 4.23797 | 2.46455E-09 |
| <b>Sec1414</b>       | 0.650796 | 12.3501 | 4.24618 | 1.54873E-13 |
| <b>Cd79b</b>         | 0.264837 | 5.0489  | 4.25279 | 2.14624E-11 |
| <b>Igkv1-117</b>     | 0.339769 | 6.48512 | 4.25451 | 0.012121    |
| <b>Fam160a1</b>      | 0.457488 | 8.74791 | 4.25713 | 0           |
| <b>Tpk1</b>          | 0.985298 | 19.1079 | 4.27746 | 7.58698E-09 |
| <b>Hp</b>            | 0.460556 | 9.06062 | 4.29816 | 0           |
| <b>Tmc4</b>          | 1.33688  | 26.6427 | 4.3168  | 0           |
| <b>Gm11839</b>       | 0.380212 | 7.57822 | 4.31698 | 0           |
| <b>Igkv1-110</b>     | 0.324788 | 6.48512 | 4.31956 | 0.0134625   |
| <b>Slc25a35</b>      | 1.05148  | 21.2323 | 4.33577 | 0           |
| <b>Nipal2</b>        | 1.08377  | 22.0002 | 4.34339 | 0           |
| <b>Gjb2</b>          | 2.5413   | 51.884  | 4.35165 | 0           |
| <b>Sec24d</b>        | 1.22969  | 25.1501 | 4.3542  | 0           |
| <b>Col6a3</b>        | 0.462868 | 9.55195 | 4.36712 | 1.06693E-10 |
| <b>Gm11841</b>       | 0.410532 | 8.52526 | 4.37618 | 0           |
| <b>Gimap4</b>        | 0.322724 | 6.70475 | 4.37681 | 7.31832E-10 |
| <b>Mmp2</b>          | 0.38531  | 8.03712 | 4.38259 | 0           |
| <b>Fam129a</b>       | 0.588872 | 12.3287 | 4.38792 | 0           |
| <b>Ehhadh</b>        | 0.685255 | 14.3944 | 4.39273 | 0           |
| <b>Col1a1</b>        | 1.07596  | 22.7107 | 4.39967 | 2.3033E-11  |
| <b>Csrp2</b>         | 2.58515  | 54.6918 | 4.40301 | 0           |
| <b>Ptpn18</b>        | 0.634984 | 13.6033 | 4.42109 | 0           |
| <b>Srpx</b>          | 0.195559 | 4.23492 | 4.43666 | 1.44059E-10 |
| <b>Myc</b>           | 0.944584 | 20.5034 | 4.44004 | 0           |
| <b>Col15a1</b>       | 1.37975  | 29.9672 | 4.44091 | 8.17046E-12 |
| <b>2510049J12Rik</b> | 0.361758 | 7.90884 | 4.45037 | 0           |
| <b>Gm5277</b>        | 0.177075 | 3.8754  | 4.45191 | 0.00087465  |
| <b>Plvap</b>         | 1.59425  | 35.0971 | 4.4604  | 0           |
| <b>Apoa2</b>         | 0.653431 | 14.3886 | 4.46075 | 8.05438E-08 |
| <b>Rhobtb1</b>       | 1.06454  | 23.7193 | 4.47776 | 0           |
| <b>Chac1</b>         | 2.07393  | 46.4165 | 4.4842  | 0           |
| <b>Dram1</b>         | 0.567621 | 12.7056 | 4.4844  | 1.67553E-06 |

|                      |          |         |         |             |
|----------------------|----------|---------|---------|-------------|
| <b>Isg20</b>         | 1.27119  | 28.4995 | 4.48669 | 0           |
| <b>Gm17572</b>       | 0.352378 | 7.90961 | 4.48841 | 0.000641178 |
| <b>RP24-323I5.2</b>  | 0.232984 | 5.23978 | 4.4912  | 1.59107E-05 |
| <b>1810059H22Rik</b> | 0.274402 | 6.17411 | 4.49187 | 1.21223E-07 |
| <b>Man2a1</b>        | 2.9682   | 67.1058 | 4.49878 | 0           |
| <b>Sigirr</b>        | 0.248981 | 5.6456  | 4.50302 | 0           |
| <b>Rem1</b>          | 0.351691 | 8.062   | 4.51876 | 0.00279149  |
| <b>Ildr1</b>         | 0.151857 | 3.51559 | 4.53298 | 2.7946E-07  |
| <b>Gm15821</b>       | 0.235095 | 5.45498 | 4.53626 | 2.56419E-12 |
| <b>Sema3b</b>        | 0.318966 | 7.41616 | 4.5392  | 0           |
| <b>Crispld2</b>      | 0.357618 | 8.35181 | 4.5456  | 4.57138E-10 |
| <b>Stap2</b>         | 0.429156 | 10.0527 | 4.54994 | 0           |
| <b>Theg</b>          | 0.698307 | 16.4494 | 4.55803 | 5.1071E-10  |
| <b>Hsbp111</b>       | 1.07681  | 25.5925 | 4.57089 | 0           |
| <b>Cldn15</b>        | 0.14537  | 3.47029 | 4.57725 | 0.00015062  |
| <b>Cmtm8</b>         | 0.57338  | 13.7011 | 4.57865 | 0           |
| <b>Gm16345</b>       | 2.86412  | 69.1872 | 4.59434 | 0.00997112  |
| <b>Trim16</b>        | 0.676333 | 16.5585 | 4.6137  | 0           |
| <b>Fbn1</b>          | 0.177986 | 4.36633 | 4.61658 | 0           |
| <b>Tspan1</b>        | 0.155936 | 3.90417 | 4.64599 | 1.88021E-08 |
| <b>Gm10320</b>       | 1.65512  | 41.5391 | 4.64947 | 0           |
| <b>Cd79a</b>         | 0.269806 | 6.78269 | 4.65186 | 0           |
| <b>Pecr</b>          | 1.74029  | 43.8095 | 4.65384 | 0           |
| <b>Plac8</b>         | 0.428824 | 10.8324 | 4.65882 | 2.99585E-12 |
| <b>Echdc3</b>        | 0.285945 | 7.25757 | 4.66567 | 2.30781E-14 |
| <b>Gck</b>           | 0.31172  | 7.92571 | 4.66822 | 1.89415E-06 |
| <b>1700026L06Rik</b> | 0.404088 | 10.3502 | 4.67884 | 0.00137379  |
| <b>Cd2</b>           | 0.156139 | 4.01217 | 4.68348 | 0.000137468 |
| <b>Thbs1</b>         | 0.151981 | 3.92222 | 4.68971 | 0           |
| <b>Gm5474</b>        | 2.06563  | 53.3663 | 4.69128 | 0           |
| <b>Fstl3</b>         | 0.170301 | 4.40149 | 4.69184 | 5.44136E-06 |
| <b>Adamts9</b>       | 0.169933 | 4.39369 | 4.6924  | 0           |
| <b>Parp16</b>        | 0.508813 | 13.1996 | 4.69722 | 0           |
| <b>Gm15441</b>       | 0.354064 | 9.19625 | 4.69896 | 0           |
| <b>Tnk1</b>          | 0.1984   | 5.15619 | 4.69982 | 1.58391E-10 |
| <b>Gm12181</b>       | 0.179094 | 4.73966 | 4.726   | 0.00109335  |
| <b>Arhgap28</b>      | 0.159065 | 4.22748 | 4.73211 | 6.99179E-05 |
| <b>4932425I24Rik</b> | 0.59368  | 15.8942 | 4.74267 | 0           |
| <b>Igsf5</b>         | 0.628959 | 16.9386 | 4.7512  | 1.4639E-11  |
| <b>Procr</b>         | 0.640319 | 17.3899 | 4.76331 | 1.56066E-13 |
| <b>Gm16234</b>       | 0.991993 | 26.9766 | 4.76523 | 0           |
| <b>Pik3ap1</b>       | 0.583889 | 16.004  | 4.7766  | 0           |
| <b>Ccdc68</b>        | 0.121107 | 3.33556 | 4.78357 | 8.53853E-07 |
| <b>1810011O10Rik</b> | 0.487264 | 13.497  | 4.79179 | 0           |
| <b>Ntn1</b>          | 0.663497 | 18.4692 | 4.79888 | 0           |
| <b>Elmo3</b>         | 0.26195  | 7.36744 | 4.8138  | 0           |

|                      |           |         |         |             |
|----------------------|-----------|---------|---------|-------------|
| <b>Mfap5</b>         | 0.704509  | 19.8168 | 4.81397 | 2.08957E-06 |
| <b>lfrd2</b>         | 1.36424   | 38.5589 | 4.82089 | 0           |
| <b>Agpat2</b>        | 0.450589  | 12.7563 | 4.82325 | 2.65507E-15 |
| <b>Celsr1</b>        | 0.210795  | 6.02877 | 4.83795 | 0           |
| <b>Mecom</b>         | 0.388216  | 11.1282 | 4.84121 | 0           |
| <b>Mfsd2b</b>        | 0.124308  | 3.56768 | 4.843   | 8.24821E-08 |
| <b>Tyms</b>          | 0.572326  | 16.5521 | 4.85404 | 0           |
| <b>1810008B01Rik</b> | 0.211785  | 6.2119  | 4.87436 | 1.59585E-09 |
| <b>Grb7</b>          | 0.40531   | 11.9011 | 4.87593 | 2.93781E-13 |
| <b>Pi16</b>          | 0.385406  | 11.3572 | 4.88108 | 0           |
| <b>Igkv12-41</b>     | 0.298268  | 8.94458 | 4.90633 | 0.00931884  |
| <b>Gm6047</b>        | 0.37029   | 11.1346 | 4.91025 | 3.50145E-09 |
| <b>Cth</b>           | 2.43469   | 73.8621 | 4.92302 | 0           |
| <b>Igkv4-57-1</b>    | 0.18271   | 5.5599  | 4.92743 | 0.0444912   |
| <b>Pbld1</b>         | 0.452597  | 13.7745 | 4.92763 | 0           |
| <b>Col14a1</b>       | 0.181486  | 5.55562 | 4.93602 | 0           |
| <b>BC017612</b>      | 0.99971   | 30.7904 | 4.94483 | 0           |
| <b>Ano1</b>          | 0.460446  | 14.1827 | 4.94496 | 0           |
| <b>Steap4</b>        | 0.180035  | 5.56787 | 4.95077 | 0           |
| <b>St6galnac2</b>    | 0.744944  | 23.1091 | 4.95519 | 0           |
| <b>Gm16693</b>       | 0.264541  | 8.24255 | 4.96152 | 0.0189727   |
| <b>Syngn2</b>        | 2.5097    | 78.2917 | 4.96327 | 0           |
| <b>Hspg2</b>         | 0.371262  | 11.6155 | 4.96747 | 0           |
| <b>Sytl1</b>         | 0.577067  | 18.1118 | 4.97205 | 0           |
| <b>Perp</b>          | 1.96993   | 61.9256 | 4.97432 | 0           |
| <b>Gm5077</b>        | 0.126312  | 3.98892 | 4.98093 | 0.00250391  |
| <b>Rph3al</b>        | 0.406298  | 12.8657 | 4.98485 | 6.88836E-12 |
| <b>1190003J15Rik</b> | 1.28835   | 40.8522 | 4.98682 | 0           |
| <b>Clec3b</b>        | 0.838806  | 26.6701 | 4.99074 | 0           |
| <b>Itih2</b>         | 1.01305   | 32.764  | 5.01533 | 0           |
| <b>Preli2</b>        | 0.259976  | 8.49821 | 5.03071 | 2.5931E-09  |
| <b>Prss53</b>        | 0.268532  | 8.78065 | 5.03116 | 0           |
| <b>Trp73</b>         | 0.106598  | 3.48822 | 5.03224 | 1.92425E-05 |
| <b>E030030I06Rik</b> | 0.112555  | 3.7036  | 5.04023 | 0.0100252   |
| <b>Snord123</b>      | 0.87248   | 28.7489 | 5.04224 | 0           |
| <b>Atp8b1</b>        | 0.274246  | 9.1165  | 5.05494 | 0           |
| <b>Ifi27l2b</b>      | 0.17834   | 5.93941 | 5.05762 | 0.0374189   |
| <b>Styx1</b>         | 0.0987004 | 3.29031 | 5.05902 | 1.19548E-05 |
| <b>Pon3</b>          | 1.29208   | 43.3201 | 5.06727 | 0           |
| <b>Slc12a8</b>       | 1.17857   | 39.634  | 5.07163 | 0           |
| <b>2210411K11Rik</b> | 0.653629  | 22.0386 | 5.07541 | 0           |
| <b>Serp1n1-ps1</b>   | 0.102094  | 3.46996 | 5.08694 | 0.00330018  |
| <b>Lgals2</b>        | 0.301654  | 10.2987 | 5.09342 | 7.22129E-09 |
| <b>Stox1</b>         | 2.05952   | 70.8311 | 5.104   | 0           |
| <b>Gm4913</b>        | 0.151948  | 5.24258 | 5.10863 | 4.07807E-12 |
| <b>Fam119b</b>       | 0.18673   | 6.51571 | 5.12489 | 0           |



|                      |           |         |         |             |
|----------------------|-----------|---------|---------|-------------|
| <b>H2-Ab1</b>        | 1.16145   | 41.2797 | 5.15144 | 0           |
| <b>Angptl1</b>       | 0.153008  | 5.44298 | 5.15271 | 0           |
| <b>Hn1l</b>          | 1.03342   | 37.3137 | 5.1742  | 0           |
| <b>Rbp7</b>          | 0.482239  | 17.5141 | 5.18263 | 1.94023E-08 |
| <b>Npw</b>           | 0.33042   | 12.249  | 5.21221 | 2.98659E-10 |
| <b>Hs3st3b1</b>      | 0.146793  | 5.45961 | 5.21694 | 0           |
| <b>Cd300lg</b>       | 0.13968   | 5.25873 | 5.23452 | 4.14658E-13 |
| <b>Prss34</b>        | 0.104248  | 3.93681 | 5.23894 | 5.56316E-08 |
| <b>Gm9826</b>        | 2.58866   | 97.8933 | 5.24093 | 0           |
| <b>Rasa4</b>         | 0.807286  | 30.5447 | 5.2417  | 0           |
| <b>Sfxn2</b>         | 0.369669  | 14.0284 | 5.24597 | 0           |
| <b>Gstt2</b>         | 0.564339  | 21.4489 | 5.2482  | 0           |
| <b>Smtnl2</b>        | 0.116823  | 4.44278 | 5.24907 | 3.59683E-06 |
| <b>Fer1l4</b>        | 0.187841  | 7.1868  | 5.25777 | 0.00899304  |
| <b>Acacb</b>         | 0.225719  | 8.70417 | 5.26911 | 0           |
| <b>Stc2</b>          | 0.401538  | 15.4854 | 5.26923 | 7.84976E-13 |
| <b>Gm5638</b>        | 0.521584  | 20.2272 | 5.27725 | 0           |
| <b>Hnf1b</b>         | 0.161356  | 6.38215 | 5.30572 | 2.15301E-07 |
| <b>Gm11963</b>       | 0.178895  | 7.08838 | 5.30827 | 0.000366779 |
| <b>Tes</b>           | 0.901228  | 35.9283 | 5.31708 | 0           |
| <b>Igkv1-122</b>     | 0.161608  | 6.48512 | 5.32656 | 0.00553122  |
| <b>Frk</b>           | 0.154898  | 6.23913 | 5.33195 | 0           |
| <b>H2-Aa</b>         | 1.71593   | 69.8175 | 5.34653 | 0           |
| <b>Glt28d2</b>       | 0.140006  | 5.79486 | 5.37121 | 0           |
| <b>Pex11c</b>        | 0.415821  | 17.2583 | 5.37519 | 0           |
| <b>1700110K17Rik</b> | 0.0820461 | 3.41087 | 5.37756 | 8.53367E-05 |
| <b>Aldh1a7</b>       | 1.48265   | 61.6569 | 5.37801 | 0           |
| <b>Gm14892</b>       | 0.552461  | 23.3493 | 5.40136 | 0.000781227 |
| <b>H2-Q2</b>         | 0.287591  | 12.1662 | 5.40272 | 0           |
| <b>0610005C13Rik</b> | 0.155707  | 6.65406 | 5.41733 | 9.29034E-07 |
| <b>Slc22a18</b>      | 0.155444  | 6.65986 | 5.42103 | 7.64863E-07 |
| <b>Col2a1</b>        | 0.110501  | 4.75475 | 5.42723 | 0.00540737  |
| <b>Gm17099</b>       | 0.133108  | 5.76009 | 5.43542 | 0.0207141   |
| <b>Igkv6-20</b>      | 0.177793  | 7.74486 | 5.44497 | 0.0105525   |
| <b>Gm17071</b>       | 0.813086  | 35.5953 | 5.45213 | 3.81102E-05 |
| <b>Igkv3-12</b>      | 0.283732  | 12.4675 | 5.4575  | 0.00175494  |
| <b>Ifi204</b>        | 0.110591  | 4.88872 | 5.46616 | 0           |
| <b>Ces2g</b>         | 0.117672  | 5.34216 | 5.50458 | 0           |
| <b>D630039A03Rik</b> | 0.0823757 | 3.75248 | 5.50948 | 0           |
| <b>2010001M09Rik</b> | 0.0821194 | 3.74837 | 5.5124  | 5.77271E-05 |
| <b>Aqp1</b>          | 0.292267  | 13.3713 | 5.51571 | 0           |
| <b>Creb3l1</b>       | 0.509207  | 23.4508 | 5.52524 | 0           |
| <b>Tmem102</b>       | 0.116677  | 5.38923 | 5.52949 | 0           |
| <b>Ttc39a</b>        | 0.553509  | 25.7479 | 5.5397  | 0           |
| <b>Gm16814</b>       | 0.193944  | 9.07859 | 5.54875 | 0.0153436   |
| <b>Gstt3</b>         | 0.853334  | 40.3315 | 5.56265 | 0           |

|                      |           |         |         |             |
|----------------------|-----------|---------|---------|-------------|
| <b>Gm2822</b>        | 0.495486  | 23.6119 | 5.57452 | 0           |
| <b>Serpinb1c</b>     | 0.163595  | 7.80107 | 5.57548 | 9.95834E-10 |
| <b>Cd36</b>          | 0.207313  | 9.96887 | 5.58754 | 0           |
| <b>Iglc2</b>         | 0.137375  | 6.64569 | 5.59623 | 0.000429943 |
| <b>B230314M03Rik</b> | 0.168098  | 8.15853 | 5.60094 | 0.0259779   |
| <b>Ggta1</b>         | 1.38114   | 67.4351 | 5.60957 | 0           |
| <b>Ppy</b>           | 0.156495  | 7.81104 | 5.64133 | 0.000939909 |
| <b>Tmprss4</b>       | 0.0702396 | 3.52199 | 5.64796 | 1.44747E-12 |
| <b>Clic6</b>         | 0.211766  | 10.6307 | 5.64962 | 8.72462E-06 |
| <b>Plek2</b>         | 0.0973373 | 4.90113 | 5.65398 | 1.42682E-12 |
| <b>H2-Eb1</b>        | 1.07014   | 54.1616 | 5.6614  | 0           |
| <b>Slc6a4</b>        | 0.0865225 | 4.39724 | 5.66738 | 0.000475971 |
| <b>Hs3st6</b>        | 0.0810247 | 4.14385 | 5.67647 | 1.39703E-07 |
| <b>Ifi30</b>         | 1.77354   | 92.6413 | 5.70696 | 0           |
| <b>Gm15545</b>       | 0.191879  | 10.0476 | 5.71051 | 1.58335E-07 |
| <b>Rab20</b>         | 0.0883009 | 4.65009 | 5.71869 | 1.42738E-10 |
| <b>Cd74</b>          | 2.15484   | 114.448 | 5.73097 | 0           |
| <b>Igkv8-21</b>      | 0.111078  | 6.04502 | 5.7661  | 0.0276609   |
| <b>Rab3d</b>         | 2.95998   | 162.559 | 5.77924 | 0           |
| <b>Sdr9c7</b>        | 0.12826   | 7.05694 | 5.7819  | 8.31791E-08 |
| <b>Vipr2</b>         | 0.139826  | 7.71753 | 5.78644 | 1.53332E-06 |
| <b>Cdc42bpg</b>      | 0.43656   | 24.4416 | 5.80701 | 7.81551E-06 |
| <b>Gm17546</b>       | 0.0768147 | 4.30329 | 5.80791 | 0.000189194 |
| <b>Lrmp</b>          | 0.507095  | 28.4703 | 5.81106 | 0           |
| <b>Slc1a5</b>        | 0.698867  | 39.295  | 5.81318 | 0           |
| <b>Edem1</b>         | 2.37559   | 134.338 | 5.82144 | 0           |
| <b>Cdcp1</b>         | 0.0697702 | 3.98159 | 5.83459 | 1.4774E-10  |
| <b>Anpep</b>         | 1.17945   | 67.6208 | 5.84128 | 0.000422335 |
| <b>Igj</b>           | 0.445765  | 25.6327 | 5.84556 | 0           |
| <b>Cdh1</b>          | 0.579111  | 33.5788 | 5.85757 | 0           |
| <b>1810020O05Rik</b> | 0.0926897 | 5.5092  | 5.89329 | 1.02595E-07 |
| <b>Myo5c</b>         | 0.212569  | 12.6437 | 5.89434 | 0           |
| <b>Marveld3</b>      | 0.0848385 | 5.13111 | 5.91841 | 0.000142481 |
| <b>Cnksr1</b>        | 0.122486  | 7.45655 | 5.92782 | 5.43544E-06 |
| <b>Cblc</b>          | 0.0903495 | 5.53031 | 5.9357  | 0.0192325   |
| <b>Galnt3</b>        | 0.347297  | 21.3155 | 5.93959 | 0           |
| <b>Rorc</b>          | 0.236233  | 14.5149 | 5.94118 | 0           |
| <b>Cyp2e1</b>        | 0.102727  | 6.35971 | 5.95208 | 0.000415189 |
| <b>Apol7a</b>        | 0.0828472 | 5.15018 | 5.95803 | 0           |
| <b>Nphs1</b>         | 0.488382  | 30.4161 | 5.96068 | 0           |
| <b>Srd5a2</b>        | 0.0885249 | 5.58153 | 5.97843 | 4.60232E-06 |
| <b>Lamb3</b>         | 0.267303  | 16.9007 | 5.98246 | 1.22671E-11 |
| <b>Llgl2</b>         | 0.700859  | 44.6641 | 5.99385 | 0           |
| <b>Rbm47</b>         | 0.249381  | 16.0247 | 6.0058  | 0.00107202  |
| <b>Tmem27</b>        | 0.172179  | 11.2186 | 6.02584 | 5.50273E-05 |
| <b>Gsta3</b>         | 0.391965  | 25.9213 | 6.04727 | 0           |

|                      |           |         |         |             |
|----------------------|-----------|---------|---------|-------------|
| <b>Gm12357</b>       | 0.159019  | 10.5444 | 6.05113 | 0.000336824 |
| <b>Sntb1</b>         | 0.21508   | 14.4324 | 6.0683  | 0           |
| <b>Arhgap8</b>       | 0.120925  | 8.18368 | 6.08057 | 0.00566327  |
| <b>Zfp503</b>        | 0.308024  | 21.2782 | 6.11019 | 0           |
| <b>Pdzk1ip1</b>      | 0.379718  | 26.7783 | 6.13999 | 0           |
| <b>Slc16a5</b>       | 0.4793    | 34.3002 | 6.16114 | 3.02488E-12 |
| <b>Krt7</b>          | 0.067174  | 4.80896 | 6.16168 | 5.26066E-15 |
| <b>Akr1c13</b>       | 0.256076  | 18.3596 | 6.16382 | 9.80293E-05 |
| <b>Mnda</b>          | 0.0588089 | 4.26875 | 6.18164 | 7.39697E-10 |
| <b>Fam83f</b>        | 0.0857603 | 6.28188 | 6.19474 | 0           |
| <b>Gm14143</b>       | 0.186738  | 13.792  | 6.20667 | 0.00334141  |
| <b>Gfi1</b>          | 0.0888099 | 6.57251 | 6.20958 | 9.25702E-10 |
| <b>Car3</b>          | 0.26052   | 19.4478 | 6.22207 | 0           |
| <b>Tdh</b>           | 0.110326  | 8.26552 | 6.22726 | 1.9742E-06  |
| <b>Fam46c</b>        | 0.726736  | 54.9734 | 6.24116 | 0           |
| <b>BC030476</b>      | 0.0733074 | 5.56792 | 6.24703 | 0           |
| <b>Gm12551</b>       | 0.280515  | 21.4705 | 6.25813 | 0           |
| <b>Pde6a</b>         | 0.0633802 | 4.89298 | 6.27054 | 1.08169E-12 |
| <b>Pi4k2b</b>        | 0.357824  | 27.7046 | 6.27473 | 0           |
| <b>Ptger3</b>        | 0.83084   | 64.8499 | 6.28639 | 0           |
| <b>Col7a1</b>        | 0.175683  | 13.9256 | 6.30862 | 8.01516E-10 |
| <b>Pbld2</b>         | 0.230459  | 19.0538 | 6.36942 | 2.65507E-15 |
| <b>Trim50</b>        | 0.0750136 | 6.25096 | 6.38078 | 3.97598E-11 |
| <b>Gm10109</b>       | 0.244479  | 20.3868 | 6.38178 | 0           |
| <b>Col3a1</b>        | 0.490176  | 41.6437 | 6.40866 | 0           |
| <b>Nup62cl</b>       | 0.207483  | 17.6424 | 6.40991 | 0.00060231  |
| <b>Dhx34</b>         | 1.28429   | 111.99  | 6.44626 | 0           |
| <b>Mthfd2</b>        | 1.83208   | 161.392 | 6.46094 | 0           |
| <b>Ap1m2</b>         | 0.268899  | 23.767  | 6.46575 | 0           |
| <b>Ighg</b>          | 0.17521   | 15.5821 | 6.47466 | 0           |
| <b>Dsg2</b>          | 0.256103  | 22.7977 | 6.47602 | 0           |
| <b>Dsc2</b>          | 0.044609  | 4.02135 | 6.4942  | 0           |
| <b>St14</b>          | 0.138594  | 13.0377 | 6.55569 | 1.54572E-06 |
| <b>Krt23</b>         | 0.117899  | 11.1459 | 6.56282 | 0           |
| <b>Gzme</b>          | 0.0353356 | 3.34176 | 6.56334 | 0.00578602  |
| <b>Rec8</b>          | 0.0346644 | 3.31424 | 6.57908 | 0.000941915 |
| <b>Mapk13</b>        | 0.252213  | 24.6079 | 6.60834 | 0           |
| <b>Cyp39a1</b>       | 1.18753   | 115.878 | 6.60849 | 0           |
| <b>Cfd</b>           | 0.290482  | 28.3548 | 6.609   | 0           |
| <b>Eif4ebp1</b>      | 1.53776   | 151.012 | 6.6177  | 0           |
| <b>Ifi205</b>        | 0.0689152 | 6.81707 | 6.62819 | 1.67589E-14 |
| <b>Tead2</b>         | 2.78026   | 275.378 | 6.63005 | 0           |
| <b>Cpa5</b>          | 0.0544584 | 5.48198 | 6.6534  | 9.54825E-08 |
| <b>Nr1h4</b>         | 0.0614931 | 6.25583 | 6.66863 | 1.33718E-15 |
| <b>Fabp4</b>         | 0.66939   | 68.8933 | 6.68537 | 0           |
| <b>1110017F19Rik</b> | 0.117734  | 12.3622 | 6.71427 | 2.04059E-13 |

|                      |           |         |         |             |
|----------------------|-----------|---------|---------|-------------|
| <b>Cldn7</b>         | 0.410167  | 43.5999 | 6.73197 | 6.65784E-11 |
| <b>Ms4a1</b>         | 0.0671202 | 7.18426 | 6.74195 | 0           |
| <b>Ehf</b>           | 0.0898138 | 9.75894 | 6.76364 | 3.23664E-06 |
| <b>Ripk4</b>         | 0.0420279 | 4.6024  | 6.7749  | 0           |
| <b>Atp2c2</b>        | 0.0867106 | 9.54713 | 6.78272 | 0           |
| <b>Slc43a3</b>       | 0.153814  | 17.1046 | 6.79705 | 5.9833E-07  |
| <b>Igf1</b>          | 2.50483   | 279.487 | 6.80192 | 0           |
| <b>Igkv8-16</b>      | 0.610634  | 68.4725 | 6.80907 | 7.54027E-09 |
| <b>Igkv5-39</b>      | 0.279575  | 32.1301 | 6.84454 | 4.61101E-05 |
| <b>Gm12368</b>       | 0.123768  | 14.3582 | 6.8581  | 0.00109873  |
| <b>Igkv8-24</b>      | 0.799675  | 98.2212 | 6.94048 | 0           |
| <b>Fgl2</b>          | 0.563513  | 70.1728 | 6.96032 | 0           |
| <b>Adh1</b>          | 0.21951   | 27.3939 | 6.96342 | 0           |
| <b>AI428936</b>      | 0.313079  | 39.1246 | 6.9654  | 0           |
| <b>2210404O07Rik</b> | 0.562831  | 70.6985 | 6.97283 | 0           |
| <b>Aldh1l2</b>       | 0.497639  | 62.7188 | 6.97765 | 0           |
| <b>1810035I16Rik</b> | 0.134545  | 16.9949 | 6.98087 | 0.00791735  |
| <b>Hrh4</b>          | 0.026123  | 3.36604 | 7.00958 | 0.00654907  |
| <b>2610528J11Rik</b> | 0.0739778 | 9.64923 | 7.02718 | 6.25495E-05 |
| <b>Scara5</b>        | 0.039664  | 5.25209 | 7.04892 | 0           |
| <b>AI661453</b>      | 0.0654676 | 8.69506 | 7.05327 | 0           |
| <b>Osgin1</b>        | 0.0985133 | 13.3519 | 7.08252 | 3.52313E-12 |
| <b>Crlf1</b>         | 1.07761   | 146.31  | 7.08506 | 0           |
| <b>Cldn9</b>         | 0.0469108 | 6.37187 | 7.08565 | 1.30308E-08 |
| <b>Mia2</b>          | 0.0411463 | 5.62376 | 7.09463 | 5.12357E-07 |
| <b>Epcam</b>         | 0.125837  | 17.4237 | 7.11335 | 0           |
| <b>Cytip</b>         | 0.14499   | 20.2248 | 7.12403 | 2.05543E-12 |
| <b>Gna14</b>         | 0.0567456 | 8.26463 | 7.1863  | 0           |
| <b>1700011H14Rik</b> | 0.029902  | 4.36296 | 7.18892 | 0.000672925 |
| <b>Pkp3</b>          | 0.184442  | 27.0176 | 7.19459 | 4.78658E-05 |
| <b>Chmp4c</b>        | 0.0323929 | 4.84141 | 7.22361 | 7.17163E-08 |
| <b>Cyp3a13</b>       | 0.0393532 | 5.96637 | 7.24423 | 0           |
| <b>Anxa13</b>        | 0.0411748 | 6.29098 | 7.25538 | 0.000174481 |
| <b>Lgals12</b>       | 0.0899945 | 13.7578 | 7.2562  | 0           |
| <b>Sh2d4a</b>        | 0.121881  | 18.7264 | 7.26346 | 0           |
| <b>Tmem221</b>       | 0.0600941 | 9.28111 | 7.27093 | 1.09962E-12 |
| <b>F2</b>            | 0.0466691 | 7.30692 | 7.29065 | 4.38727E-11 |
| <b>Saa3</b>          | 0.0778529 | 12.2285 | 7.29528 | 9.21049E-06 |
| <b>Ppic</b>          | 1.3985    | 219.98  | 7.29735 | 0           |
| <b>Gpihbp1</b>       | 0.0450107 | 7.10866 | 7.30316 | 0.00113825  |
| <b>Retnla</b>        | 0.227536  | 35.9998 | 7.30575 | 1.33718E-15 |
| <b>1810010K12Rik</b> | 0.152397  | 24.3862 | 7.32209 | 0           |
| <b>Cpa3</b>          | 0.0231181 | 3.70428 | 7.32402 | 0.000407956 |
| <b>Hpn</b>           | 0.932454  | 149.633 | 7.32618 | 0           |
| <b>1810009N23Rik</b> | 0.0813749 | 13.0639 | 7.32678 | 0           |
| <b>G6pc2</b>         | 0.0991691 | 15.9387 | 7.32842 | 0.000399655 |

|                      |           |         |         |             |
|----------------------|-----------|---------|---------|-------------|
| <b>Pycr1</b>         | 0.821279  | 132.544 | 7.33438 | 0           |
| <b>Dennd2d</b>       | 0.0766988 | 12.4292 | 7.34031 | 0           |
| <b>Ccl11</b>         | 0.0936127 | 15.1813 | 7.34137 | 1.48765E-13 |
| <b>Ms4a4d</b>        | 0.0403318 | 6.56801 | 7.34739 | 5.68279E-08 |
| <b>Lpin3</b>         | 0.130929  | 21.4364 | 7.35513 | 1.13582E-07 |
| <b>Gata6</b>         | 0.0322217 | 5.31745 | 7.36656 | 7.83987E-15 |
| <b>Irf6</b>          | 0.210388  | 34.7828 | 7.36918 | 0           |
| <b>Cd5</b>           | 0.022086  | 3.66702 | 7.37533 | 2.39842E-07 |
| <b>Wdr72</b>         | 0.0672099 | 11.3157 | 7.39544 | 5.64513E-10 |
| <b>Gm16136</b>       | 0.0252911 | 4.29759 | 7.40875 | 0.00135209  |
| <b>C1rl</b>          | 0.117315  | 20.687  | 7.4622  | 0           |
| <b>Pkd1l2</b>        | 0.034321  | 6.0725  | 7.46705 | 0           |
| <b>Rab25</b>         | 0.375085  | 67.1962 | 7.48502 | 5.67333E-07 |
| <b>Arhgef16</b>      | 0.0985698 | 18.6058 | 7.56039 | 3.35224E-09 |
| <b>Kdelr3</b>        | 0.231597  | 43.9539 | 7.56823 | 0           |
| <b>Tc2n</b>          | 0.0749429 | 15.0301 | 7.64785 | 0           |
| <b>Dpt</b>           | 0.156309  | 32.0167 | 7.67828 | 0           |
| <b>Gm16285</b>       | 0.0951732 | 19.8684 | 7.70571 | 0.0125452   |
| <b>Klb</b>           | 0.0510369 | 10.7216 | 7.71477 | 0           |
| <b>Bspry</b>         | 0.09199   | 19.4221 | 7.72201 | 0           |
| <b>Kcnq1</b>         | 0.117635  | 24.8448 | 7.72249 | 0           |
| <b>Fam187b</b>       | 0.0402942 | 8.55475 | 7.73001 | 7.78114E-08 |
| <b>Myo15b</b>        | 0.107374  | 23.0097 | 7.74345 | 3.36035E-08 |
| <b>Tjp3</b>          | 0.0198111 | 4.28605 | 7.7572  | 7.91455E-10 |
| <b>Glyat</b>         | 0.0200841 | 4.35707 | 7.76116 | 1.55873E-06 |
| <b>Gm12718</b>       | 0.0365224 | 8.05663 | 7.78525 | 0.0212362   |
| <b>Slc38a5</b>       | 2.80302   | 627.506 | 7.8065  | 0           |
| <b>Sult1c2</b>       | 0.0527514 | 11.8802 | 7.81514 | 0           |
| <b>Nr0b2</b>         | 0.0621144 | 14.4807 | 7.86499 | 1.31207E-10 |
| <b>Spint1</b>        | 0.391345  | 92.0709 | 7.87816 | 0           |
| <b>lyd</b>           | 0.101168  | 24.4353 | 7.91607 | 1.4302E-09  |
| <b>Vdr</b>           | 0.03909   | 9.44246 | 7.91622 | 0           |
| <b>Cd3g</b>          | 0.0351714 | 8.63895 | 7.94031 | 0.000465443 |
| <b>Mep1a</b>         | 0.0189084 | 4.71719 | 7.96276 | 0.000562588 |
| <b>Tsga10ip</b>      | 0.143904  | 37.0358 | 8.00767 | 1.25172E-08 |
| <b>Fam110c</b>       | 0.0276026 | 7.15729 | 8.01847 | 9.1268E-15  |
| <b>Ang</b>           | 0.956974  | 252.64  | 8.04439 | 0           |
| <b>Tm4sf4</b>        | 0.0446663 | 12.3334 | 8.10917 | 2.93705E-11 |
| <b>Gnat2</b>         | 0.0617406 | 17.4624 | 8.14381 | 7.97254E-09 |
| <b>Derl3</b>         | 0.771579  | 219.745 | 8.1538  | 0           |
| <b>Dap</b>           | 2.79547   | 797.626 | 8.15648 | 0           |
| <b>Gylt1b</b>        | 0.0195035 | 5.6318  | 8.17372 | 5.5718E-07  |
| <b>Glp1r</b>         | 0.0419086 | 12.1719 | 8.1821  | 1.51342E-06 |
| <b>Gm12499</b>       | 0.0850013 | 24.7981 | 8.18853 | 0.000040979 |
| <b>Spag17</b>        | 0.0286351 | 8.38244 | 8.19344 | 0.0140117   |
| <b>4930415O20Rik</b> | 0.191613  | 56.4729 | 8.20322 | 4.9676E-11  |

|                  |            |         |         |             |
|------------------|------------|---------|---------|-------------|
| <b>Tmem30b</b>   | 0.0609123  | 18.0104 | 8.20788 | 0           |
| <b>Ttc29</b>     | 0.0114478  | 3.4424  | 8.2322  | 2.49951E-05 |
| <b>Tinag</b>     | 0.0451582  | 13.7483 | 8.25005 | 1.33718E-15 |
| <b>Cxcl13</b>    | 0.0706166  | 21.5433 | 8.25301 | 2.67972E-12 |
| <b>Tcea3</b>     | 0.164788   | 50.8559 | 8.26966 | 0           |
| <b>Ces1d</b>     | 0.15       | 47.2409 | 8.29893 | 6.09541E-11 |
| <b>Dsp</b>       | 0.0301828  | 9.51168 | 8.29983 | 0           |
| <b>Esrp2</b>     | 0.097088   | 30.9727 | 8.31749 | 7.52177E-06 |
| <b>Grhl2</b>     | 0.0104653  | 3.35378 | 8.32404 | 1.81374E-06 |
| <b>Foxa2</b>     | 0.0593079  | 19.4229 | 8.35532 | 3.6975E-11  |
| <b>Spag16</b>    | 0.0309988  | 10.1929 | 8.36114 | 5.2729E-10  |
| <b>Slc17a9</b>   | 0.0344671  | 11.4633 | 8.37759 | 0.000499489 |
| <b>Gm13824</b>   | 0.0807092  | 27.3552 | 8.40487 | 0.00131779  |
| <b>Sostdc1</b>   | 0.182451   | 64.3773 | 8.4629  | 0           |
| <b>Fetub</b>     | 0.0201446  | 7.38859 | 8.51876 | 0.00664013  |
| <b>Crb3</b>      | 0.118944   | 43.7923 | 8.52425 | 1.15331E-09 |
| <b>Akr1c12</b>   | 0.0399659  | 14.8609 | 8.53853 | 2.53338E-10 |
| <b>P2rx1</b>     | 0.25889    | 96.7083 | 8.54516 | 0           |
| <b>Elf3</b>      | 0.0215567  | 8.81349 | 8.67544 | 4.95447E-09 |
| <b>Afm</b>       | 0.0159363  | 6.58313 | 8.69031 | 0.000467593 |
| <b>Ambp</b>      | 0.0241197  | 10.0119 | 8.69729 | 1.25292E-07 |
| <b>Igkv3-2</b>   | 0.161608   | 67.1563 | 8.69888 | 4.30255E-08 |
| <b>Klrb1f</b>    | 0.0191931  | 7.9761  | 8.69895 | 2.19127E-05 |
| <b>Iapp</b>      | 0.695864   | 289.257 | 8.69933 | 0           |
| <b>Dpep1</b>     | 0.0331282  | 14.4613 | 8.76992 | 0           |
| <b>Abca13</b>    | 0.0109687  | 4.78828 | 8.76997 | 7.46358E-08 |
| <b>Esrp1</b>     | 0.0490355  | 21.4132 | 8.77046 | 0           |
| <b>Klk1b22</b>   | 0.433952   | 189.855 | 8.77314 | 0           |
| <b>Gm11695</b>   | 0.0676013  | 30.2052 | 8.80353 | 0.00372477  |
| <b>C3</b>        | 0.145331   | 65.6031 | 8.81828 | 0           |
| <b>Serpina10</b> | 0.0417304  | 19.6571 | 8.87973 | 1.00386E-10 |
| <b>Baiap2l1</b>  | 0.0719196  | 34.8128 | 8.91902 | 0           |
| <b>Prom2</b>     | 0.0271554  | 13.3963 | 8.94638 | 0           |
| <b>Krt19</b>     | 0.0623304  | 31.0472 | 8.96031 | 7.33011E-05 |
| <b>Spdef</b>     | 0.0442625  | 23.4987 | 9.05228 | 6.54249E-06 |
| <b>Ggt1</b>      | 2.29288    | 1237.62 | 9.07619 | 0           |
| <b>Gm14755</b>   | 0.314557   | 175.351 | 9.12271 | 3.69021E-14 |
| <b>Slc44a3</b>   | 0.0472592  | 26.989  | 9.15756 | 0           |
| <b>Fkbp11</b>    | 1.51996    | 877.042 | 9.17247 | 0           |
| <b>Gcg</b>       | 0.709806   | 412.375 | 9.18232 | 0           |
| <b>Rasef</b>     | 0.00969335 | 5.64697 | 9.18627 | 1.5049E-10  |
| <b>Gnmt</b>      | 0.513774   | 306.262 | 9.21942 | 0           |
| <b>Pah</b>       | 0.566826   | 352.342 | 9.27986 | 0           |
| <b>Foxa3</b>     | 0.0312782  | 19.6993 | 9.29877 | 4.15807E-07 |
| <b>Cldn8</b>     | 0.0272707  | 17.1862 | 9.29968 | 1.07959E-11 |
| <b>Gc</b>        | 0.0175707  | 11.2419 | 9.3215  | 3.19075E-09 |

|                      |            |         |         |             |
|----------------------|------------|---------|---------|-------------|
| <b>Gm15915</b>       | 0.0197036  | 12.9625 | 9.36168 | 0.00193012  |
| <b>Azgp1</b>         | 0.0259591  | 17.1337 | 9.36638 | 2.93125E-06 |
| <b>Gm6484</b>        | 0.0195443  | 13.0291 | 9.38078 | 0.00407243  |
| <b>Aqp8</b>          | 0.0225068  | 15.2044 | 9.39991 | 2.69907E-06 |
| <b>Egf</b>           | 0.0992226  | 68.3321 | 9.42768 | 0           |
| <b>Klk1b26</b>       | 0.0721267  | 51.1433 | 9.4698  | 1.44756E-08 |
| <b>Klk1b1</b>        | 0.296803   | 211.712 | 9.47838 | 0           |
| <b>Klk1b9</b>        | 0.547567   | 403.513 | 9.52536 | 0           |
| <b>9130219A07Rik</b> | 0.0448617  | 33.1568 | 9.52961 | 0           |
| <b>Adipoq</b>        | 0.0235895  | 17.6488 | 9.54721 | 1.61656E-09 |
| <b>Alb</b>           | 0.0139761  | 10.527  | 9.55692 | 1.19067E-09 |
| <b>Ces1e</b>         | 0.0390326  | 29.8781 | 9.58019 | 0           |
| <b>Nr5a2</b>         | 0.0229354  | 18.1318 | 9.62673 | 0           |
| <b>Krt18</b>         | 0.354305   | 283.231 | 9.64277 | 0           |
| <b>Piwil4</b>        | 0.0774866  | 62.8332 | 9.66337 | 0           |
| <b>Ugt2b34</b>       | 0.0297006  | 24.0866 | 9.66352 | 0           |
| <b>Klk1b8</b>        | 0.27343    | 225.46  | 9.68748 | 0           |
| <b>Ins1</b>          | 0.780969   | 646.203 | 9.69251 | 0           |
| <b>Hamp</b>          | 0.220566   | 185.06  | 9.71257 | 4.85216E-13 |
| <b>Rbpjl</b>         | 0.126439   | 107.507 | 9.73177 | 0           |
| <b>Fgf21</b>         | 0.0352901  | 31.904  | 9.82026 | 3.65455E-10 |
| <b>Klk1b16</b>       | 0.11667    | 108.738 | 9.86421 | 0           |
| <b>Klk1b3</b>        | 1.25059    | 1168.47 | 9.8678  | 0           |
| <b>Gata4</b>         | 0.025703   | 24.8536 | 9.9173  | 3.36818E-12 |
| <b>Klk1b4</b>        | 0.939403   | 910.403 | 9.92055 | 0           |
| <b>Klk1b21</b>       | 0.651441   | 647.562 | 9.95717 | 0           |
| <b>Klk1b24</b>       | 0.537256   | 538.226 | 9.96839 | 0           |
| <b>Krt8</b>          | 0.140251   | 147.44  | 10.0379 | 0           |
| <b>Gm13336</b>       | 0.0241144  | 25.6225 | 10.0533 | 2.44819E-05 |
| <b>Klk1b27</b>       | 0.295444   | 323.554 | 10.0969 | 0           |
| <b>Reg3g</b>         | 0.0448841  | 49.2157 | 10.0987 | 1.03584E-10 |
| <b>Hsd17b13</b>      | 0.602819   | 666.836 | 10.1114 | 0           |
| <b>Reg3a</b>         | 0.585311   | 648.158 | 10.1129 | 0           |
| <b>Tmed11</b>        | 0.90572    | 1006.5  | 10.118  | 0           |
| <b>Slc39a5</b>       | 0.252078   | 291.99  | 10.1778 | 0           |
| <b>Muc1</b>          | 0.285788   | 335.701 | 10.198  | 0           |
| <b>Pax5</b>          | 0.00669856 | 7.99278 | 10.2206 | 0.000891493 |
| <b>Fut1</b>          | 0.00769944 | 9.20735 | 10.2238 | 4.6056E-06  |
| <b>Tmed6</b>         | 2.15607    | 2600.85 | 10.2364 | 0           |
| <b>Reg3d</b>         | 2.57827    | 3149.34 | 10.2544 | 0           |
| <b>Tmem184a</b>      | 0.0370273  | 46.3166 | 10.2887 | 0           |
| <b>Aqp12</b>         | 0.509439   | 648.801 | 10.3147 | 0           |
| <b>Erp27</b>         | 1.54481    | 2033.52 | 10.3623 | 0           |
| <b>Klk1b11</b>       | 0.403441   | 534.049 | 10.3704 | 0           |
| <b>Prss8</b>         | 0.0729706  | 96.8079 | 10.3736 | 0           |
| <b>Itih4</b>         | 0.117024   | 156.243 | 10.3828 | 0           |

|                      |            |         |             |             |
|----------------------|------------|---------|-------------|-------------|
| <b>Mat1a</b>         | 0.0391188  | 52.3266 | 10.3855     | 0           |
| <b>Cpn1</b>          | 0.0684817  | 97.3861 | 10.4738     | 0           |
| <b>Gm2663</b>        | 0.020019   | 29.1855 | 10.5097     | 0.000728427 |
| <b>Cabp2</b>         | 0.690863   | 1008.88 | 10.5121     | 1.20609E-12 |
| <b>Hamp2</b>         | 0.753756   | 1110.32 | 10.5246     | 0           |
| <b>Habp2</b>         | 0.0671788  | 102.501 | 10.5753     | 5.6807E-09  |
| <b>Gal</b>           | 0.605189   | 947.344 | 10.6123     | 0           |
| <b>1810009J06Rik</b> | 0.020019   | 31.3894 | 10.6147     | 0.000636603 |
| <b>Bhlha15</b>       | 0.0813015  | 140.541 | 10.7554     | 0           |
| <b>Ptf1a</b>         | 0.0498924  | 87.0205 | 10.7683     | 0           |
| <b>Il22ra1</b>       | 0.012217   | 21.7377 | 10.7971     | 5.0705E-08  |
| <b>Cckar</b>         | 0.221781   | 407.66  | 10.844      | 0           |
| <b>Cldn3</b>         | 0.0265522  | 53.8283 | 10.9853     | 7.21969E-08 |
| <b>Prr15l</b>        | 0.0588786  | 122.971 | 11.0283     | 0           |
| <b>2210010C17Rik</b> | 0.00548271 | 17.6866 | 11.6555     | 0.0112349   |
| <b>Hgfac</b>         | 0.0216914  | 95.1789 | 12.0993     | 0           |
| <b>Ccdc64b</b>       | 0          | 3.20542 | 1.7977E+308 | 7.37799E-05 |
| <b>Mcpt1</b>         | 0          | 3.33084 | 1.7977E+308 | 0.00496495  |
| <b>A1cf</b>          | 0          | 3.72485 | 1.7977E+308 | 2.95536E-10 |
| <b>Hrasls5</b>       | 0          | 4.0073  | 1.7977E+308 | 0.0384314   |
| <b>Agr2</b>          | 0          | 4.01372 | 1.7977E+308 | 0.0101629   |
| <b>Gm16551</b>       | 0          | 4.34305 | 1.7977E+308 | 0.000532621 |
| <b>Gm12082</b>       | 0          | 4.35922 | 1.7977E+308 | 0.0279766   |
| <b>1700006A11Rik</b> | 0          | 4.3918  | 1.7977E+308 | 9.88065E-06 |
| <b>Klk15</b>         | 0          | 5.30504 | 1.7977E+308 | 0.00370051  |
| <b>Gm12298</b>       | 0          | 5.36998 | 1.7977E+308 | 0.0058119   |
| <b>Dio1</b>          | 0          | 5.92617 | 1.7977E+308 | 0.0228468   |
| <b>Hnf4a</b>         | 0          | 7.96782 | 1.7977E+308 | 0.000172497 |
| <b>Chrdl2</b>        | 0          | 8.10837 | 1.7977E+308 | 0.000482224 |
| <b>Upk3b</b>         | 0          | 8.47312 | 1.7977E+308 | 3.4604E-12  |
| <b>Gm20418</b>       | 0          | 9.16983 | 1.7977E+308 | 0.00257507  |
| <b>AI324046</b>      | 0          | 10.2181 | 1.7977E+308 | 2.16749E-06 |
| <b>1810019D21Rik</b> | 0          | 10.7397 | 1.7977E+308 | 0.000160058 |
| <b>Igkv4-55</b>      | 0          | 11.0083 | 1.7977E+308 | 0.0351907   |
| <b>4930405O22Rik</b> | 0          | 11.5834 | 1.7977E+308 | 0.000284087 |
| <b>1810019J16Rik</b> | 0          | 11.7275 | 1.7977E+308 | 7.66685E-11 |
| <b>Igkv16-104</b>    | 0          | 11.8483 | 1.7977E+308 | 0.0401714   |
| <b>Iglv2</b>         | 0          | 11.8483 | 1.7977E+308 | 0.0401714   |
| <b>Igkv12-44</b>     | 0          | 11.9261 | 1.7977E+308 | 0.0401714   |
| <b>Igkv12-46</b>     | 0          | 11.9261 | 1.7977E+308 | 0.0401714   |
| <b>Ighv8-5</b>       | 0          | 12.8481 | 1.7977E+308 | 0.0401714   |
| <b>Gm9740</b>        | 0          | 13.0087 | 1.7977E+308 | 0.0261034   |
| <b>Gm16637</b>       | 0          | 13.9304 | 1.7977E+308 | 0.0262162   |
| <b>Krtap6-2</b>      | 0          | 14.4072 | 1.7977E+308 | 0.00390258  |
| <b>Gm13010</b>       | 0          | 14.6024 | 1.7977E+308 | 2.13889E-07 |
| <b>Ugt3a1</b>        | 0          | 15.4798 | 1.7977E+308 | 0.00403412  |



|                      |   |         |             |             |
|----------------------|---|---------|-------------|-------------|
| <b>Igkv8-28</b>      | 0 | 16.294  | 1.7977E+308 | 0.0401714   |
| <b>Gm16698</b>       | 0 | 16.7833 | 1.7977E+308 | 0.0115093   |
| <b>Gm16930</b>       | 0 | 16.888  | 1.7977E+308 | 0.0115093   |
| <b>Ighv11-2</b>      | 0 | 17.2099 | 1.7977E+308 | 0.0115093   |
| <b>Klk1b7-ps</b>     | 0 | 19.0009 | 1.7977E+308 | 0.000311401 |
| <b>Pyv</b>           | 0 | 20.7368 | 1.7977E+308 | 4.93355E-05 |
| <b>1810058N05Rik</b> | 0 | 20.879  | 1.7977E+308 | 4.98298E-05 |
| <b>Adm2</b>          | 0 | 21.8522 | 1.7977E+308 | 2.46807E-12 |
| <b>Igkv4-50</b>      | 0 | 23.3816 | 1.7977E+308 | 0.00203963  |
| <b>Gm4744</b>        | 0 | 26.9229 | 1.7977E+308 | 6.26964E-11 |
| <b>Defb34</b>        | 0 | 29.8178 | 1.7977E+308 | 0.0244075   |
| <b>Igkv4-91</b>      | 0 | 32.3827 | 1.7977E+308 | 0.000274039 |
| <b>Gm16717</b>       | 0 | 33.661  | 1.7977E+308 | 0.000140659 |
| <b>Ighv1-5</b>       | 0 | 39.3992 | 1.7977E+308 | 0.00131362  |
| <b>Gm12135</b>       | 0 | 42.5832 | 1.7977E+308 | 3.70889E-08 |
| <b>1810063I02Rik</b> | 0 | 44.7306 | 1.7977E+308 | 0.00146081  |
| <b>Igkv15-103</b>    | 0 | 45.3506 | 1.7977E+308 | 2.03558E-05 |
| <b>Rnf212</b>        | 0 | 59.7349 | 1.7977E+308 | 2.49427E-05 |
| <b>Igkv14-126</b>    | 0 | 87.8421 | 1.7977E+308 | 4.66655E-10 |
| <b>Ndufb8</b>        | 0 | 88.3562 | 1.7977E+308 | 0.0274107   |
| <b>Snord118</b>      | 0 | 206.443 | 1.7977E+308 | 0.0359811   |
| <b>1700112K13Rik</b> | 0 | 215.54  | 1.7977E+308 | 3.908E-36   |
| <b>SNORA17</b>       | 0 | 428.356 | 1.7977E+308 | 0.00232494  |
| <b>Snord13</b>       | 0 | 490.99  | 1.7977E+308 | 0.0301686   |

## Supplementary Table 5

Genes significantly down-regulated in SA1 KO

| gene               | E17.5 WT (FPKM) | E17.5 KO (FPKM) | log2 (fold change) | FDR         |
|--------------------|-----------------|-----------------|--------------------|-------------|
| <b>Cyp26b1</b>     | 6.91            | 2.26            | -1.61              | 0           |
| <b>Ttr</b>         | 626.44          | 216.86          | -1.53              | 0           |
| <b>Htr2c</b>       | 4.32            | 1.64            | -1.40              | 0           |
| <b>Tmem181b-ps</b> | 48.77           | 23.42           | -1.06              | 0           |
| <b>Lrrc8b</b>      | 13.42           | 7.15            | -0.91              | 0           |
| <b>Cntn1</b>       | 35.15           | 21.25           | -0.73              | 0           |
| <b>Col3a1</b>      | 31.81           | 19.55           | -0.70              | 0           |
| <b>Sema6d</b>      | 19.50           | 14.01           | -0.48              | 0           |
| <b>Syt6</b>        | 16.54           | 12.32           | -0.42              | 0           |
| <b>Trpm3</b>       | 6.90            | 3.02            | -1.19              | 4.65289E-13 |
| <b>Cobl</b>        | 16.33           | 9.85            | -0.73              | 4.65289E-13 |
| <b>Kcne2</b>       | 6.64            | 2.01            | -1.73              | 1.80828E-12 |
| <b>Col1a1</b>      | 28.90           | 11.47           | -1.33              | 2.11403E-12 |
| <b>Grin3a</b>      | 16.86           | 7.59            | -1.15              | 2.21012E-12 |
| <b>Tac1</b>        | 27.20           | 11.93           | -1.19              | 2.29853E-12 |
| <b>Sepp1</b>       | 80.69           | 35.62           | -1.18              | 4.25023E-12 |
| <b>Btbd3</b>       | 27.82           | 18.45           | -0.59              | 5.07509E-12 |
| <b>Dnajc6</b>      | 49.08           | 32.22           | -0.61              | 1.32607E-11 |
| <b>Gm17669</b>     | 26.62           | 4.70            | -2.50              | 4.17784E-11 |
| <b>Napb</b>        | 37.18           | 29.71           | -0.32              | 8.76012E-11 |
| <b>Gh</b>          | 28.31           | 4.40            | -2.69              | 8.81448E-11 |
| <b>Rims3</b>       | 31.68           | 23.66           | -0.42              | 4.09118E-10 |
| <b>Clic6</b>       | 7.04            | 1.36            | -2.38              | 5.85852E-10 |
| <b>Mecp2</b>       | 20.36           | 16.52           | -0.30              | 5.85852E-10 |
| <b>Gprasp1</b>     | 154.72          | 134.94          | -0.20              | 1.59894E-09 |
| <b>Myo16</b>       | 15.39           | 11.78           | -0.39              | 1.95745E-09 |
| <b>Dlg2</b>        | 36.89           | 24.46           | -0.59              | 3.71124E-09 |
| <b>Nav1</b>        | 35.69           | 30.46           | -0.23              | 3.85762E-09 |
| <b>Slc24a3</b>     | 21.79           | 14.68           | -0.57              | 4.26262E-09 |
| <b>Enpp2</b>       | 17.26           | 9.82            | -0.81              | 9.98226E-09 |
| <b>Stag1</b>       | 25.74           | 11.12           | -1.21              | 1.10607E-08 |
| <b>Dnajc5</b>      | 106.09          | 81.73           | -0.38              | 1.10607E-08 |
| <b>Tcf7l2</b>      | 109.14          | 71.67           | -0.61              | 1.29586E-08 |
| <b>Gabbr3</b>      | 53.51           | 39.21           | -0.45              | 1.48052E-08 |
| <b>Sema6a</b>      | 19.01           | 14.41           | -0.40              | 1.53982E-08 |
|                    |                 |                 | -                  |             |
| <b>Gm16042</b>     | 4.06            | 0.00            | 1.7977E+308        | 2.02012E-08 |
| <b>Aqp1</b>        | 6.83            | 1.98            | -1.79              | 2.51902E-08 |
| <b>Mdm4</b>        | 10.36           | 6.58            | -0.66              | 2.64062E-08 |
| <b>Pcdh10</b>      | 27.66           | 16.63           | -0.73              | 2.7749E-08  |

|                |        |        |       |             |
|----------------|--------|--------|-------|-------------|
| <b>Cbln2</b>   | 30.62  | 20.47  | -0.58 | 3.0098E-08  |
| <b>Sv2c</b>    | 2.16   | 0.53   | -2.03 | 3.35832E-08 |
| <b>Npy</b>     | 101.54 | 37.36  | -1.44 | 3.86552E-08 |
| <b>Tro</b>     | 57.31  | 42.89  | -0.42 | 3.86552E-08 |
| <b>Atp6v1a</b> | 72.99  | 56.57  | -0.37 | 3.94227E-08 |
| <b>Ptk2b</b>   | 5.49   | 2.52   | -1.12 | 5.97605E-08 |
| <b>Pcdh7</b>   | 6.48   | 2.75   | -1.24 | 7.01107E-08 |
| <b>Eif2s3y</b> | 48.58  | 24.45  | -0.99 | 7.01107E-08 |
| <b>Spock3</b>  | 16.30  | 11.08  | -0.56 | 7.07109E-08 |
| <b>Osbpl1a</b> | 40.06  | 25.19  | -0.67 | 7.71049E-08 |
| <b>Kif1b</b>   | 120.10 | 80.11  | -0.58 | 7.71049E-08 |
| <b>Col6a1</b>  | 8.33   | 4.92   | -0.76 | 8.84022E-08 |
| <b>Dgkk</b>    | 3.68   | 1.68   | -1.13 | 1.15217E-07 |
| <b>Tmtc1</b>   | 6.01   | 4.04   | -0.57 | 1.15217E-07 |
| <b>Pltp</b>    | 36.47  | 18.83  | -0.95 | 1.74304E-07 |
| <b>Car12</b>   | 3.57   | 1.28   | -1.48 | 1.79173E-07 |
| <b>Ednrb</b>   | 27.18  | 17.71  | -0.62 | 2.39228E-07 |
| <b>Dnmt3a</b>  | 52.19  | 31.76  | -0.72 | 2.39325E-07 |
| <b>40969</b>   | 15.47  | 10.49  | -0.56 | 2.39325E-07 |
| <b>Col1a2</b>  | 39.21  | 23.16  | -0.76 | 2.91579E-07 |
| <b>Foxn3</b>   | 6.08   | 3.29   | -0.89 | 3.86544E-07 |
| <b>Gm12987</b> | 12.89  | 1.36   | -3.25 | 3.92137E-07 |
| <b>Fam40b</b>  | 3.21   | 1.77   | -0.86 | 4.37363E-07 |
| <b>Pcdh11x</b> | 6.99   | 2.75   | -1.35 | 4.58589E-07 |
| <b>Agps</b>    | 14.03  | 10.17  | -0.46 | 4.72848E-07 |
| <b>Accn1</b>   | 14.56  | 9.47   | -0.62 | 4.75717E-07 |
| <b>Pcdh17</b>  | 14.49  | 6.80   | -1.09 | 5.66178E-07 |
| <b>Zim1</b>    | 4.42   | 1.61   | -1.46 | 6.16831E-07 |
| <b>Pcdh19</b>  | 12.91  | 6.99   | -0.88 | 6.44318E-07 |
| <b>Alcam</b>   | 41.69  | 23.42  | -0.83 | 7.73032E-07 |
| <b>Scg2</b>    | 62.88  | 40.85  | -0.62 | 7.73032E-07 |
| <b>Caln1</b>   | 7.62   | 4.13   | -0.88 | 9.26816E-07 |
| <b>Wdr7</b>    | 21.06  | 17.03  | -0.31 | 9.70112E-07 |
| <b>Edil3</b>   | 19.79  | 15.95  | -0.31 | 1.15559E-06 |
| <b>Calcr</b>   | 3.25   | 1.27   | -1.36 | 1.1657E-06  |
| <b>Sstr1</b>   | 6.42   | 2.63   | -1.29 | 1.23676E-06 |
| <b>Tgfb2</b>   | 10.35  | 5.55   | -0.90 | 1.24123E-06 |
| <b>Postn</b>   | 17.94  | 7.93   | -1.18 | 1.28487E-06 |
| <b>Ttyh1</b>   | 171.45 | 116.34 | -0.56 | 1.49824E-06 |
| <b>Gprasp2</b> | 155.72 | 104.40 | -0.58 | 1.81767E-06 |
| <b>Sema3c</b>  | 32.34  | 19.76  | -0.71 | 1.85801E-06 |
| <b>Apoe</b>    | 266.37 | 192.79 | -0.47 | 1.98909E-06 |
| <b>Dpp10</b>   | 15.43  | 9.78   | -0.66 | 2.05411E-06 |
| <b>Atp1a2</b>  | 50.29  | 33.58  | -0.58 | 2.36216E-06 |
| <b>Epha7</b>   | 26.50  | 16.47  | -0.69 | 2.46623E-06 |
| <b>Tln2</b>    | 8.48   | 6.22   | -0.45 | 2.99482E-06 |

|                   |         |         |       |             |
|-------------------|---------|---------|-------|-------------|
| <b>Grm5</b>       | 27.67   | 14.93   | -0.89 | 3.21849E-06 |
| <b>Kif26b</b>     | 5.21    | 3.11    | -0.74 | 3.21849E-06 |
| <b>Pdgfra</b>     | 9.79    | 5.70    | -0.78 | 3.44468E-06 |
| <b>Cdhr1</b>      | 5.35    | 1.95    | -1.46 | 3.4607E-06  |
| <b>Cntn6</b>      | 7.85    | 5.05    | -0.64 | 3.49002E-06 |
| <b>Slc6a2</b>     | 0.57    | 0.09    | -2.74 | 3.84556E-06 |
| <b>Pja2</b>       | 136.29  | 99.38   | -0.46 | 4.3044E-06  |
| <b>Klhl11</b>     | 4.46    | 1.45    | -1.62 | 4.7606E-06  |
| <b>Shc3</b>       | 7.03    | 3.05    | -1.20 | 4.7606E-06  |
| <b>Ogdh</b>       | 49.13   | 41.13   | -0.26 | 5.01422E-06 |
| <b>Dlgap3</b>     | 35.97   | 21.10   | -0.77 | 5.24527E-06 |
| <b>Igf2</b>       | 103.61  | 77.46   | -0.42 | 7.00519E-06 |
| <b>Trpc4</b>      | 6.62    | 3.19    | -1.06 | 8.21563E-06 |
| <b>Ptgds</b>      | 219.89  | 172.87  | -0.35 | 8.21563E-06 |
| <b>Sulf1</b>      | 8.76    | 3.78    | -1.21 | 8.66034E-06 |
| <b>Aplnr</b>      | 6.79    | 2.70    | -1.33 | 9.06657E-06 |
| <b>Slc22a23</b>   | 24.05   | 17.97   | -0.42 | 9.6594E-06  |
| <b>S100pbb</b>    | 34.73   | 19.07   | -0.86 | 1.03647E-05 |
| <b>Igfbbp5</b>    | 45.62   | 31.39   | -0.54 | 1.06993E-05 |
| <b>Add3</b>       | 14.29   | 10.50   | -0.44 | 1.40387E-05 |
| <b>Prrc2b</b>     | 121.00  | 94.36   | -0.36 | 1.56324E-05 |
| <b>Abhd14a</b>    | 31.64   | 20.05   | -0.66 | 1.72649E-05 |
| <b>Cpne7</b>      | 11.10   | 5.40    | -1.04 | 1.74886E-05 |
| <b>Iqsec3</b>     | 10.64   | 8.21    | -0.37 | 1.74886E-05 |
| <b>Cttnb1</b>     | 607.96  | 503.53  | -0.27 | 1.74886E-05 |
| <b>Unc13c</b>     | 1.62    | 0.49    | -1.71 | 1.79377E-05 |
| <b>Rreb1</b>      | 2.61    | 0.96    | -1.45 | 1.79926E-05 |
| <b>Mgll</b>       | 10.58   | 6.50    | -0.70 | 1.79926E-05 |
| <b>Astn2</b>      | 9.04    | 5.93    | -0.61 | 1.79926E-05 |
| <b>Pcdha11</b>    | 65.75   | 53.73   | -0.29 | 1.79926E-05 |
| <b>Efna5</b>      | 8.64    | 2.65    | -1.70 | 1.91932E-05 |
| <b>AC115697.1</b> | 2545.43 | 784.63  | -1.70 | 1.95437E-05 |
| <b>Eif4g2</b>     | 2545.12 | 2119.50 | -0.26 | 2.15229E-05 |
| <b>Col8a2</b>     | 2.96    | 0.76    | -1.95 | 2.71569E-05 |
| <b>Kif5c</b>      | 249.85  | 158.98  | -0.65 | 2.74148E-05 |
| <b>Cntnap5b</b>   | 0.98    | 0.32    | -1.64 | 2.97066E-05 |
| <b>Trim9</b>      | 22.42   | 18.57   | -0.27 | 0.000030494 |
| <b>Cpne6</b>      | 7.55    | 3.99    | -0.92 | 3.30081E-05 |
| <b>Whsc1</b>      | 89.14   | 64.07   | -0.48 | 0.000033696 |
| <b>Atp2b3</b>     | 6.55    | 4.76    | -0.46 | 0.000033696 |
| <b>Gfra2</b>      | 14.22   | 9.47    | -0.59 | 0.000033911 |
| <b>Adra1b</b>     | 2.92    | 1.08    | -1.43 | 0.000034697 |
| <b>Man1a2</b>     | 15.56   | 9.56    | -0.70 | 3.50685E-05 |
| <b>Rerg</b>       | 5.46    | 2.29    | -1.25 | 3.51823E-05 |
| <b>Neto2</b>      | 40.97   | 28.13   | -0.54 | 3.63219E-05 |
| <b>Igsf9b</b>     | 1.45    | 0.50    | -1.52 | 3.70821E-05 |

|                      |         |         |       |             |
|----------------------|---------|---------|-------|-------------|
| <b>Atp6v0a1</b>      | 129.88  | 91.69   | -0.50 | 4.22676E-05 |
| <b>Tnks</b>          | 16.63   | 9.00    | -0.89 | 4.54411E-05 |
| <b>Frmpr4</b>        | 1.84    | 0.90    | -1.04 | 4.62747E-05 |
| <b>Vstm2a</b>        | 27.89   | 15.43   | -0.85 | 4.67449E-05 |
| <b>Amot</b>          | 6.51    | 4.98    | -0.39 | 4.83686E-05 |
| <b>Ddx3y</b>         | 5.69    | 2.38    | -1.25 | 4.84338E-05 |
| <b>Pcsk6</b>         | 2.52    | 1.37    | -0.88 | 4.84338E-05 |
| <b>Gm17236</b>       | 3.40    | 1.26    | -1.43 | 5.18073E-05 |
| <b>Gm5567</b>        | 6.39    | 2.61    | -1.29 | 5.18073E-05 |
| <b>Arhgap32</b>      | 13.81   | 11.14   | -0.31 | 5.58756E-05 |
| <b>Abat</b>          | 43.06   | 22.93   | -0.91 | 5.85832E-05 |
| <b>Sostdc1</b>       | 6.29    | 2.30    | -1.45 | 5.88832E-05 |
| <b>Dcc</b>           | 3.55    | 1.56    | -1.19 | 5.88832E-05 |
| <b>Kctd12</b>        | 20.44   | 10.83   | -0.92 | 6.50768E-05 |
| <b>Ptprg</b>         | 21.85   | 11.97   | -0.87 | 6.73577E-05 |
| <b>Eno2</b>          | 93.42   | 66.45   | -0.49 | 6.85812E-05 |
| <b>Lmbrd2</b>        | 4.63    | 1.89    | -1.30 | 6.96957E-05 |
| <b>Cldn1</b>         | 2.96    | 1.08    | -1.45 | 7.51821E-05 |
| <b>Crebbp</b>        | 10.00   | 7.93    | -0.33 | 7.90076E-05 |
| <b>Nrxn3</b>         | 29.27   | 20.64   | -0.50 | 0.000079359 |
| <b>Hs6st3</b>        | 3.70    | 1.14    | -1.70 | 8.67207E-05 |
| <b>Pls3</b>          | 20.26   | 13.75   | -0.56 | 8.71414E-05 |
| <b>Tmem72</b>        | 0.87    | 0.08    | -3.48 | 9.00523E-05 |
| <b>Nrxn1</b>         | 53.35   | 36.39   | -0.55 | 9.03162E-05 |
| <b>Lpcat1</b>        | 56.90   | 44.23   | -0.36 | 9.55878E-05 |
| <b>Tnc</b>           | 38.79   | 32.53   | -0.25 | 9.67065E-05 |
| <b>Nell1</b>         | 12.56   | 6.42    | -0.97 | 9.86167E-05 |
| <b>Arhgef3</b>       | 4.55    | 2.57    | -0.82 | 0.000101496 |
| <b>Mitf</b>          | 1.16    | 0.40    | -1.55 | 0.000109868 |
| <b>Sorcs1</b>        | 6.54    | 3.87    | -0.76 | 0.000118809 |
| <b>Mgat5</b>         | 12.55   | 8.17    | -0.62 | 0.000119533 |
| <b>Ibsp</b>          | 1.25    | 0.14    | -3.13 | 0.000126266 |
| <b>Gfra1</b>         | 11.54   | 6.99    | -0.72 | 0.000140609 |
| <b>Sv2b</b>          | 7.81    | 4.84    | -0.69 | 0.000142233 |
| <b>Cadm1</b>         | 89.42   | 75.41   | -0.25 | 0.000142233 |
| <b>Adnp</b>          | 36.30   | 21.79   | -0.74 | 0.000153266 |
| <b>Hap1</b>          | 173.28  | 137.86  | -0.33 | 0.00015627  |
| <b>Clmn</b>          | 1.54    | 0.96    | -0.67 | 0.000163974 |
| <b>Prkcb</b>         | 38.57   | 23.07   | -0.74 | 0.000169159 |
| <b>Hbb-b1</b>        | 2057.79 | 1663.33 | -0.31 | 0.000186481 |
| <b>9330182L06Rik</b> | 12.73   | 8.78    | -0.53 | 0.000192091 |
| <b>Tmem132d</b>      | 1.83    | 0.68    | -1.43 | 0.000195469 |
| <b>Gm13740</b>       | 20.74   | 2.29    | -3.18 | 0.000198624 |
| <b>Sorbs1</b>        | 15.41   | 11.06   | -0.48 | 0.000198624 |
| <b>Celf1</b>         | 75.19   | 58.71   | -0.36 | 0.000203515 |
| <b>Zkscan16</b>      | 1.77    | 0.55    | -1.68 | 0.000210868 |

|                      |         |         |       |             |
|----------------------|---------|---------|-------|-------------|
| <b>Cdh3</b>          | 0.97    | 0.29    | -1.72 | 0.000225581 |
| <b>AC073947.1</b>    | 3206.63 | 1174.49 | -1.45 | 0.000231033 |
| <b>AC163694.1</b>    | 3205.50 | 1174.49 | -1.45 | 0.000232288 |
| <b>Tmem181a</b>      | 31.23   | 16.44   | -0.93 | 0.000233479 |
| <b>6330439K17Rik</b> | 16.64   | 7.80    | -1.09 | 0.000236259 |
| <b>Tmem132b</b>      | 9.30    | 3.95    | -1.24 | 0.000238725 |
| <b>Lrig1</b>         | 12.32   | 6.96    | -0.82 | 0.000253041 |
| <b>Ngef</b>          | 22.27   | 13.16   | -0.76 | 0.000259398 |
| <b>Itga7</b>         | 2.28    | 1.11    | -1.04 | 0.000266071 |
| <b>Htr7</b>          | 5.36    | 2.70    | -0.99 | 0.000267586 |
| <b>Gm20546</b>       | 3.67    | 1.36    | -1.43 | 0.000296196 |
| <b>Wfikkn2</b>       | 4.33    | 1.48    | -1.55 | 0.000302895 |
| <b>Ncam2</b>         | 7.39    | 4.06    | -0.86 | 0.000302895 |
| <b>Fam65b</b>        | 17.30   | 14.21   | -0.28 | 0.000302895 |
| <b>Slco1a4</b>       | 1.48    | 0.38    | -1.95 | 0.000324382 |
| <b>Nfe2l1</b>        | 81.13   | 60.90   | -0.41 | 0.000324382 |
| <b>Abca9</b>         | 2.35    | 0.99    | -1.25 | 0.000331776 |
| <b>Gm17446</b>       | 20.12   | 11.22   | -0.84 | 0.000331776 |
| <b>Pex5l</b>         | 4.79    | 2.10    | -1.19 | 0.000352916 |
| <b>Pcdh1</b>         | 27.28   | 19.26   | -0.50 | 0.000359269 |
| <b>Npnt</b>          | 6.87    | 3.33    | -1.05 | 0.000377853 |
| <b>Cpne4</b>         | 13.11   | 8.47    | -0.63 | 0.000378698 |
| <b>Gm13213</b>       | 8.08    | 1.48    | -2.45 | 0.000440713 |
| <b>Mtap9</b>         | 42.70   | 32.20   | -0.41 | 0.000440713 |
| <b>Akap7</b>         | 27.51   | 19.21   | -0.52 | 0.000440873 |
| <b>Npcd</b>          | 16.09   | 8.69    | -0.89 | 0.000442907 |
| <b>Usp6nl</b>        | 8.85    | 5.97    | -0.57 | 0.000442907 |
| <b>Folr1</b>         | 21.07   | 7.53    | -1.48 | 0.000486435 |
| <b>Clu</b>           | 67.25   | 47.06   | -0.51 | 0.000503988 |
| <b>Calb1</b>         | 14.28   | 7.29    | -0.97 | 0.000505085 |
| <b>Pik3r1</b>        | 55.68   | 34.20   | -0.70 | 0.000524909 |
| <b>Nts</b>           | 30.73   | 15.50   | -0.99 | 0.000551555 |
| <b>Adamts12</b>      | 0.77    | 0.27    | -1.54 | 0.000563471 |
| <b>Ccdc108</b>       | 1.37    | 0.60    | -1.20 | 0.000577071 |
| <b>Cadm3</b>         | 144.12  | 120.96  | -0.25 | 0.000579283 |
| <b>Fam120c</b>       | 5.75    | 3.39    | -0.76 | 0.000634423 |
| <b>Cdh18</b>         | 4.98    | 2.52    | -0.98 | 0.000650225 |
| <b>Alg10b</b>        | 20.22   | 11.49   | -0.81 | 0.000653029 |
| <b>Rasgrf2</b>       | 11.11   | 5.61    | -0.98 | 0.000693725 |
| <b>Nisch</b>         | 476.07  | 403.90  | -0.24 | 0.000697352 |
| <b>Plekhg1</b>       | 3.61    | 1.99    | -0.86 | 0.000716046 |
| <b>Net1</b>          | 5.53    | 3.72    | -0.57 | 0.000737628 |
| <b>Cacna2d2</b>      | 34.11   | 21.74   | -0.65 | 0.000746636 |
| <b>Ermp1</b>         | 9.04    | 4.79    | -0.92 | 0.000756669 |
| <b>Cpeb4</b>         | 29.03   | 21.63   | -0.42 | 0.00077412  |
| <b>Ndst4</b>         | 1.83    | 0.69    | -1.40 | 0.000784097 |

|               |        |       |             |             |
|---------------|--------|-------|-------------|-------------|
| Tgfa          | 13.09  | 7.12  | -0.88       | 0.000802045 |
| Gstm1         | 55.45  | 41.13 | -0.43       | 0.000816582 |
| Kcnk9         | 3.40   | 0.93  | -1.87       | 0.000834864 |
| Il1rap        | 4.16   | 2.00  | -1.05       | 0.00085483  |
|               |        |       | -           |             |
| Ckm           | 0.74   | 0.00  | 1.7977E+308 | 0.000882236 |
| Prox1         | 6.22   | 3.08  | -1.01       | 0.000887939 |
| Slc9a7        | 2.12   | 0.89  | -1.24       | 0.000894585 |
| Aqp4          | 3.88   | 1.72  | -1.17       | 0.000907749 |
| Zfp106        | 35.30  | 21.14 | -0.74       | 0.000932327 |
| Lrtm2         | 8.25   | 5.55  | -0.57       | 0.000933429 |
| Kif2a         | 89.19  | 59.92 | -0.57       | 0.000937342 |
| Cdkl2         | 11.50  | 7.35  | -0.65       | 0.000952936 |
| Ppm1m         | 10.23  | 4.73  | -1.11       | 0.000971786 |
| Tmem164       | 12.72  | 10.18 | -0.32       | 0.0010158   |
| Cfh           | 4.64   | 3.16  | -0.55       | 0.00106829  |
| Vgf           | 13.61  | 6.90  | -0.98       | 0.00109081  |
| Serpinf1      | 22.23  | 11.16 | -0.99       | 0.00112077  |
| Nov           | 9.07   | 4.30  | -1.08       | 0.00113001  |
| Rgnf          | 5.06   | 3.58  | -0.50       | 0.00116109  |
| Syn3          | 15.44  | 9.02  | -0.77       | 0.00116769  |
| Eif2c2        | 6.16   | 3.42  | -0.85       | 0.00124229  |
| Mdga2         | 3.73   | 2.14  | -0.80       | 0.00128505  |
| Gja1          | 40.41  | 23.98 | -0.75       | 0.00130257  |
| Uhmk1         | 15.35  | 10.57 | -0.54       | 0.00137677  |
| Anks1b        | 27.61  | 22.74 | -0.28       | 0.00137709  |
| Cul5          | 23.52  | 16.68 | -0.50       | 0.00138836  |
| Apod          | 102.88 | 68.75 | -0.58       | 0.00139248  |
| Ntm           | 88.37  | 65.42 | -0.43       | 0.00139248  |
| Rasgrp1       | 4.24   | 2.08  | -1.03       | 0.00140813  |
| E230008N13Rik | 0.65   | 0.11  | -2.56       | 0.0014755   |
| Gabra5        | 24.41  | 13.84 | -0.82       | 0.00150754  |
| Nxph1         | 18.88  | 14.40 | -0.39       | 0.00151602  |
| Pcp4l1        | 7.95   | 3.47  | -1.20       | 0.00157353  |
| Matn2         | 2.48   | 1.35  | -0.87       | 0.00159545  |
| Klf12         | 4.93   | 2.58  | -0.94       | 0.00160276  |
| Kcna2         | 0.60   | 0.10  | -2.52       | 0.00164071  |
| Adcy1         | 26.27  | 16.79 | -0.65       | 0.00167249  |
| 4930402H24Rik | 75.60  | 51.55 | -0.55       | 0.00167314  |
| Deptor        | 0.69   | 0.28  | -1.31       | 0.00167766  |
| Slc6a3        | 1.62   | 0.59  | -1.46       | 0.00169453  |
| Prrc2c        | 16.14  | 10.99 | -0.55       | 0.00169453  |
| Col25a1       | 5.66   | 3.20  | -0.82       | 0.00169837  |
| L3mbtl3       | 25.31  | 20.48 | -0.31       | 0.00169837  |
| Chrm2         | 2.40   | 1.08  | -1.16       | 0.00179725  |
| Arhgap24      | 4.26   | 2.37  | -0.84       | 0.00185701  |

|               |        |        |       |            |
|---------------|--------|--------|-------|------------|
| Glrb          | 20.86  | 16.18  | -0.37 | 0.00185701 |
| Pip5k1c       | 101.07 | 89.67  | -0.17 | 0.00185701 |
| Slc1a3        | 70.73  | 46.26  | -0.61 | 0.00188995 |
| Slc22a8       | 6.02   | 3.87   | -0.64 | 0.00189717 |
| Tom1l2        | 45.46  | 35.74  | -0.35 | 0.00189717 |
| D5Erttd579e   | 57.22  | 37.36  | -0.61 | 0.00191283 |
| Ptprk         | 17.62  | 13.11  | -0.43 | 0.00191537 |
| Abca1         | 11.43  | 6.55   | -0.80 | 0.00192006 |
| Fstl5         | 18.57  | 10.74  | -0.79 | 0.00199352 |
| Shisa9        | 7.45   | 3.72   | -1.00 | 0.00204312 |
| Pdzd2         | 3.98   | 2.28   | -0.80 | 0.00205481 |
| Pvr13         | 22.39  | 14.85  | -0.59 | 0.00205481 |
| Otud4         | 16.67  | 13.23  | -0.33 | 0.00206198 |
| Zfp398        | 5.36   | 3.40   | -0.66 | 0.00210203 |
| Dab2          | 11.12  | 6.19   | -0.85 | 0.00220067 |
| Grb10         | 45.26  | 30.85  | -0.55 | 0.00220919 |
| Odz1          | 5.76   | 3.43   | -0.75 | 0.00221685 |
| St3gal1       | 11.74  | 9.33   | -0.33 | 0.00222292 |
| Lcor          | 1.28   | 0.53   | -1.27 | 0.00224514 |
| 1110059M19Rik | 2.49   | 0.66   | -1.91 | 0.00229277 |
| Grik2         | 24.79  | 19.61  | -0.34 | 0.00229277 |
| Gm7292        | 95.70  | 57.22  | -0.74 | 0.00239516 |
| Pid1          | 20.00  | 14.40  | -0.47 | 0.0023993  |
| Cd47          | 31.82  | 21.02  | -0.60 | 0.00244937 |
| Hmgcr         | 212.33 | 167.39 | -0.34 | 0.00244937 |
| Kcna3         | 1.74   | 0.61   | -1.51 | 0.00249595 |
| Ppfia2        | 24.85  | 20.75  | -0.26 | 0.0025064  |
| Cdh7          | 8.33   | 4.38   | -0.93 | 0.00251594 |
| Hipk2         | 5.03   | 2.77   | -0.86 | 0.00252865 |
| Kif1c         | 9.02   | 7.11   | -0.34 | 0.00254454 |
| H19           | 213.22 | 173.32 | -0.30 | 0.00254454 |
| Syt11         | 135.21 | 120.44 | -0.17 | 0.00254454 |
| Cnr1          | 47.94  | 42.93  | -0.16 | 0.00254454 |
| Cds2          | 49.37  | 32.38  | -0.61 | 0.00263015 |
| Gabrg1        | 7.47   | 3.89   | -0.94 | 0.00263699 |
| Spp1          | 7.17   | 2.84   | -1.33 | 0.00268988 |
| Tmem181d-ps   | 9.11   | 3.71   | -1.29 | 0.00268988 |
| Tmem181c-ps   | 9.11   | 3.71   | -1.29 | 0.00268988 |
| Htr1a         | 1.89   | 0.78   | -1.27 | 0.00268988 |
| Nacc2         | 6.34   | 3.42   | -0.89 | 0.00268988 |
| Cntnap4       | 8.12   | 5.50   | -0.56 | 0.00268988 |
| Igf1r         | 7.35   | 5.35   | -0.46 | 0.00279715 |
| Cadps2        | 7.77   | 4.76   | -0.71 | 0.00280967 |
| Xrn1          | 2.50   | 1.19   | -1.07 | 0.00287714 |
| Rpl29         | 68.03  | 39.17  | -0.80 | 0.00299391 |
| Ubr3          | 55.52  | 41.21  | -0.43 | 0.00300156 |



|               |        |        |       |            |
|---------------|--------|--------|-------|------------|
| Trpc5         | 1.17   | 0.46   | -1.34 | 0.00301996 |
| Cgnl1         | 6.30   | 2.52   | -1.32 | 0.00302376 |
| Myof          | 0.92   | 0.40   | -1.19 | 0.00307818 |
| Ncald         | 73.92  | 52.98  | -0.48 | 0.00315523 |
| Sulf2         | 78.58  | 57.46  | -0.45 | 0.00316802 |
| Ntnng1        | 27.38  | 18.71  | -0.55 | 0.00317772 |
| Igsf1         | 5.16   | 2.96   | -0.80 | 0.00327618 |
| Dlgap1        | 19.54  | 15.13  | -0.37 | 0.00327921 |
| Pla2g7        | 19.13  | 11.79  | -0.70 | 0.00330591 |
| Mlec          | 36.63  | 23.13  | -0.66 | 0.00332307 |
| Rab27b        | 2.97   | 1.68   | -0.82 | 0.00334724 |
| Inpp4a        | 31.06  | 21.93  | -0.50 | 0.00337511 |
| Samd5         | 2.29   | 0.90   | -1.35 | 0.00353395 |
| Dock10        | 1.73   | 0.93   | -0.89 | 0.00354375 |
| Ptchd1        | 3.14   | 0.96   | -1.71 | 0.00360122 |
| Synm          | 3.98   | 2.51   | -0.67 | 0.00369595 |
| Ogn           | 7.57   | 3.84   | -0.98 | 0.00371516 |
| Unc5c         | 4.54   | 2.44   | -0.90 | 0.00373519 |
| Wiz           | 46.16  | 40.48  | -0.19 | 0.00374513 |
| Fstl4         | 1.11   | 0.44   | -1.32 | 0.00378171 |
| Grik1         | 10.35  | 6.87   | -0.59 | 0.00379448 |
| Gm17675       | 0.92   | 0.34   | -1.45 | 0.00383898 |
| Sphkap        | 17.16  | 9.26   | -0.89 | 0.00386908 |
| Zic4          | 51.52  | 32.92  | -0.65 | 0.00386908 |
| Slmap         | 30.97  | 21.47  | -0.53 | 0.00388303 |
| Gda           | 8.15   | 4.59   | -0.83 | 0.00393108 |
| Chst2         | 16.73  | 10.48  | -0.67 | 0.00393108 |
| Epb4.1l2      | 13.18  | 10.61  | -0.31 | 0.00399879 |
| Aebp1         | 8.93   | 5.90   | -0.60 | 0.00402466 |
| Vwc2l         | 3.97   | 2.31   | -0.78 | 0.00402785 |
| 2810011L19Rik | 11.29  | 8.58   | -0.40 | 0.0040707  |
| Sema3d        | 1.02   | 0.41   | -1.32 | 0.00411625 |
| Igf1          | 3.35   | 1.12   | -1.58 | 0.00418546 |
| Zfp871        | 1.89   | 0.87   | -1.11 | 0.00423189 |
| Adamts15      | 3.34   | 1.64   | -1.03 | 0.00442927 |
| Pkp4          | 69.77  | 51.44  | -0.44 | 0.00445668 |
| Stx1a         | 75.12  | 61.00  | -0.30 | 0.00455595 |
| AI593442      | 13.66  | 8.22   | -0.73 | 0.00455628 |
| Rnf112        | 44.53  | 33.12  | -0.43 | 0.00455628 |
| Atp1a3        | 289.79 | 202.22 | -0.52 | 0.00460589 |
| Fam5c         | 13.05  | 7.73   | -0.76 | 0.0046912  |
| Ube3a         | 10.17  | 6.94   | -0.55 | 0.00470108 |
| Adcy9         | 2.96   | 1.68   | -0.82 | 0.00474397 |
| Lmo4          | 141.52 | 123.17 | -0.20 | 0.00474472 |
| Dhcr7         | 72.70  | 52.51  | -0.47 | 0.00484174 |
| Cntnap3       | 2.03   | 0.95   | -1.09 | 0.00484741 |

|               |        |        |       |            |
|---------------|--------|--------|-------|------------|
| Hook1         | 50.28  | 35.45  | -0.50 | 0.00484741 |
| Actn4         | 98.83  | 76.85  | -0.36 | 0.00491496 |
| Rod1          | 9.10   | 5.99   | -0.60 | 0.00491567 |
| Epb4.1l1      | 107.41 | 86.03  | -0.32 | 0.00493755 |
| Xkr4          | 2.41   | 1.43   | -0.75 | 0.00499035 |
| Diras2        | 17.19  | 10.52  | -0.71 | 0.00499608 |
| Cxcl14        | 8.70   | 5.62   | -0.63 | 0.00500508 |
| Shank1        | 49.42  | 34.73  | -0.51 | 0.00500508 |
| Plcx3         | 3.60   | 0.94   | -1.95 | 0.00500595 |
| Vat1l         | 44.79  | 28.64  | -0.65 | 0.00500595 |
| Kdm5d         | 3.74   | 1.81   | -1.05 | 0.00501353 |
| Pgap1         | 5.12   | 2.55   | -1.00 | 0.00509629 |
| Angel2        | 28.47  | 23.35  | -0.29 | 0.00523851 |
| Slc6a11       | 31.12  | 19.36  | -0.68 | 0.00532175 |
| Met           | 5.37   | 2.32   | -1.21 | 0.0053823  |
| Lmtk3         | 110.41 | 91.81  | -0.27 | 0.00553361 |
| Slit2         | 16.35  | 9.09   | -0.85 | 0.00558754 |
| Trhde         | 2.77   | 1.37   | -1.01 | 0.00563649 |
| Sesn3         | 6.95   | 3.45   | -1.01 | 0.00563649 |
| Hspa5         | 260.48 | 211.25 | -0.30 | 0.00565574 |
| Gprn3         | 0.65   | 0.16   | -1.99 | 0.00570146 |
| Mfrp          | 1.12   | 0.28   | -1.99 | 0.00572697 |
| Mtdh          | 50.69  | 40.14  | -0.34 | 0.00572697 |
| Grid2         | 2.63   | 1.31   | -1.00 | 0.00574038 |
| Chrm1         | 3.08   | 2.05   | -0.59 | 0.00584834 |
| Def8          | 34.58  | 22.81  | -0.60 | 0.0058865  |
| Chrm3         | 3.99   | 1.74   | -1.20 | 0.005966   |
| Atxn1         | 2.52   | 1.26   | -1.00 | 0.00621455 |
| Nos1ap        | 15.11  | 8.11   | -0.90 | 0.00621455 |
| Trpc7         | 3.20   | 2.10   | -0.61 | 0.00621455 |
| Cntnap5a      | 1.35   | 0.60   | -1.18 | 0.00633853 |
| Mical3        | 8.15   | 5.91   | -0.46 | 0.00636037 |
| Hmgcs2        | 5.28   | 3.13   | -0.76 | 0.00648722 |
| Kif5b         | 42.34  | 29.41  | -0.53 | 0.00696176 |
| Fam84b        | 6.22   | 3.62   | -0.78 | 0.00705118 |
| Mpdz          | 24.16  | 16.12  | -0.58 | 0.00705432 |
| Hyou1         | 42.50  | 32.21  | -0.40 | 0.00705432 |
| Pcdhb21       | 1.13   | 0.48   | -1.23 | 0.00710828 |
| S100a16       | 28.45  | 17.93  | -0.67 | 0.00711964 |
| Sparc         | 158.74 | 117.67 | -0.43 | 0.00721244 |
| Alx4          | 1.21   | 0.55   | -1.14 | 0.00722415 |
| Gabbr1        | 300.47 | 230.34 | -0.38 | 0.00735491 |
| 6330403A02Rik | 10.17  | 6.26   | -0.70 | 0.00748438 |
| Syp           | 204.22 | 164.59 | -0.31 | 0.00760266 |
| Myc           | 19.90  | 14.34  | -0.47 | 0.0076316  |
| Ccdc135       | 1.28   | 0.50   | -1.37 | 0.00764936 |

|               |        |        |       |            |
|---------------|--------|--------|-------|------------|
| Hsph1         | 74.86  | 61.49  | -0.28 | 0.00774683 |
| Kcnj2         | 2.74   | 1.41   | -0.96 | 0.00787633 |
| Aldh1a1       | 4.25   | 1.84   | -1.21 | 0.00803985 |
| Vsnl1         | 47.66  | 29.52  | -0.69 | 0.0080425  |
| Prune2        | 3.19   | 1.76   | -0.86 | 0.00814242 |
| Atp10d        | 3.04   | 1.75   | -0.80 | 0.00819857 |
| St5           | 6.08   | 4.37   | -0.48 | 0.00831916 |
| Foxp1         | 25.51  | 20.25  | -0.33 | 0.00835007 |
| Mrc1          | 4.10   | 2.15   | -0.93 | 0.00842064 |
| Mtap7d2       | 18.70  | 15.39  | -0.28 | 0.00848195 |
| Alkbh8        | 19.55  | 13.58  | -0.53 | 0.00876481 |
| Cacna1e       | 10.24  | 6.71   | -0.61 | 0.00894823 |
| Gm15564       | 52.04  | 25.78  | -1.01 | 0.00928326 |
| Notch2        | 5.99   | 5.04   | -0.25 | 0.00931638 |
| Krt18         | 3.05   | 1.29   | -1.25 | 0.00935879 |
| Gm5135        | 3.86   | 0.56   | -2.78 | 0.00939745 |
| Ncor1         | 153.53 | 123.55 | -0.31 | 0.00956243 |
| 4921513D23Rik | 11.90  | 10.03  | -0.25 | 0.00966189 |
| Cdh6          | 3.10   | 1.48   | -1.07 | 0.00967175 |
| Sox10         | 3.24   | 1.97   | -0.72 | 0.00968417 |
| Galnt7        | 5.99   | 3.60   | -0.74 | 0.0098135  |
| Larp4b        | 21.60  | 16.47  | -0.39 | 0.00988691 |
| AW551984      | 113.19 | 86.65  | -0.39 | 0.00988691 |
| Uprt          | 2.83   | 1.31   | -1.11 | 0.00994099 |
| Foxj1         | 7.42   | 4.02   | -0.88 | 0.00994099 |
| Gm15212       | 6.03   | 1.26   | -2.26 | 0.00998621 |
| 1700009P17Rik | 8.64   | 4.10   | -1.07 | 0.0102259  |
| Adra1a        | 0.74   | 0.28   | -1.41 | 0.0103772  |
| Fbxw7         | 20.09  | 16.41  | -0.29 | 0.0106988  |
| Six2          | 1.62   | 0.66   | -1.30 | 0.0107068  |
| Pak3          | 34.58  | 23.56  | -0.55 | 0.0107551  |
| Dpp6          | 45.00  | 37.97  | -0.24 | 0.0108243  |
| Arpp21        | 46.32  | 34.41  | -0.43 | 0.010909   |
| Mkx           | 1.21   | 0.50   | -1.27 | 0.0109763  |
| Pomc          | 4.99   | 2.03   | -1.29 | 0.0110518  |
| Thbs2         | 1.56   | 0.73   | -1.10 | 0.0112529  |
| Tmem106b      | 24.99  | 15.56  | -0.68 | 0.0116544  |
| Ralgapa1      | 14.98  | 12.64  | -0.25 | 0.0116544  |
| Scn3a         | 22.47  | 15.56  | -0.53 | 0.0117657  |
| Cask          | 75.46  | 54.56  | -0.47 | 0.0117657  |
| Cand1         | 65.57  | 45.03  | -0.54 | 0.0119892  |
| Lhx9          | 18.11  | 14.64  | -0.31 | 0.0120855  |
| Man1a         | 4.91   | 2.81   | -0.81 | 0.0121808  |
| Gfap          | 5.03   | 1.62   | -1.63 | 0.0122442  |
| Ctdspl2       | 14.57  | 11.63  | -0.33 | 0.0122442  |
| Zic1          | 91.61  | 64.57  | -0.50 | 0.0122829  |

|                      |        |        |       |           |
|----------------------|--------|--------|-------|-----------|
| <b>Tmem132b</b>      | 5.53   | 2.58   | -1.10 | 0.0127498 |
| <b>Adra2a</b>        | 4.94   | 2.63   | -0.91 | 0.012759  |
| <b>Mapkbp1</b>       | 18.67  | 14.63  | -0.35 | 0.0128701 |
| <b>Mbnl2</b>         | 7.51   | 6.07   | -0.31 | 0.0130986 |
| <b>Lrrc1</b>         | 5.77   | 4.04   | -0.51 | 0.0131401 |
| <b>Pde4d</b>         | 14.30  | 10.28  | -0.48 | 0.0132273 |
| <b>4932411E22Rik</b> | 1.53   | 0.62   | -1.31 | 0.0132978 |
| <b>Atp1b1</b>        | 127.16 | 85.28  | -0.58 | 0.0135088 |
| <b>Ndst1</b>         | 25.35  | 18.99  | -0.42 | 0.0135088 |
| <b>Ctsk</b>          | 4.05   | 1.88   | -1.11 | 0.0137492 |
| <b>Rgs9</b>          | 9.75   | 6.79   | -0.52 | 0.0138104 |
| <b>Mast4</b>         | 9.78   | 7.27   | -0.43 | 0.0138147 |
| <b>Ttc21a</b>        | 1.87   | 0.57   | -1.70 | 0.0138739 |
| <b>Snca</b>          | 42.05  | 33.30  | -0.34 | 0.0138739 |
| <b>Slc11a2</b>       | 27.82  | 17.41  | -0.68 | 0.013886  |
| <b>Zdhhc23</b>       | 2.88   | 1.35   | -1.10 | 0.0140955 |
| <b>Zkscan2</b>       | 14.07  | 8.77   | -0.68 | 0.0140955 |
| <b>Rsph4a</b>        | 1.60   | 0.82   | -0.96 | 0.0141445 |
| <b>Ndr4</b>          | 193.25 | 155.44 | -0.31 | 0.0142007 |
| <b>Reps2</b>         | 9.12   | 7.16   | -0.35 | 0.0142094 |
| <b>Aff2</b>          | 4.37   | 2.31   | -0.92 | 0.0142995 |
| <b>Slc16a12</b>      | 1.38   | 0.63   | -1.12 | 0.0145922 |
| <b>Ahcy1</b>         | 123.00 | 103.88 | -0.24 | 0.0147708 |
| <b>Tgfbr2</b>        | 2.83   | 1.64   | -0.79 | 0.014801  |
| <b>Irs4</b>          | 2.55   | 1.27   | -1.01 | 0.0148722 |
| <b>Col5a2</b>        | 13.68  | 8.11   | -0.75 | 0.0148786 |
| <b>Slc16a9</b>       | 1.66   | 0.68   | -1.28 | 0.0149592 |
| <b>Xylt1</b>         | 2.80   | 1.39   | -1.01 | 0.0149969 |
| <b>Gnb4</b>          | 32.26  | 25.08  | -0.36 | 0.0150456 |
| <b>Fam149a</b>       | 6.52   | 4.68   | -0.48 | 0.0150563 |
| <b>Htr2a</b>         | 1.14   | 0.47   | -1.28 | 0.015403  |
| <b>Pcdhb7</b>        | 5.26   | 2.90   | -0.86 | 0.015403  |
| <b>Kif21b</b>        | 98.11  | 85.53  | -0.20 | 0.0159047 |
| <b>Pcdhb22</b>       | 3.93   | 2.31   | -0.77 | 0.0159768 |
| <b>Ptch1</b>         | 19.94  | 13.59  | -0.55 | 0.0160023 |
| <b>Klf9</b>          | 2.22   | 1.07   | -1.06 | 0.0160758 |
| <b>Arl4a</b>         | 38.00  | 28.26  | -0.43 | 0.0160758 |
| <b>Usp15</b>         | 21.73  | 18.28  | -0.25 | 0.0160758 |
| <b>BC067074</b>      | 0.90   | 0.43   | -1.08 | 0.0160822 |
| <b>Plekhb1</b>       | 10.14  | 5.16   | -0.97 | 0.0162632 |
| <b>Fstl1</b>         | 67.12  | 45.50  | -0.56 | 0.0162931 |
| <b>Dcn</b>           | 19.99  | 11.93  | -0.74 | 0.0163426 |
| <b>Apcdd1</b>        | 34.62  | 23.89  | -0.54 | 0.0163426 |
| <b>Snx27</b>         | 37.40  | 26.01  | -0.52 | 0.0163426 |
| <b>Ptpn14</b>        | 1.09   | 0.66   | -0.71 | 0.0165015 |
| <b>Col18a1</b>       | 9.42   | 5.86   | -0.69 | 0.016516  |

|                      |        |        |       |           |
|----------------------|--------|--------|-------|-----------|
| <b>Zmat4</b>         | 6.70   | 2.07   | -1.69 | 0.01652   |
| <b>Anxa6</b>         | 23.34  | 17.87  | -0.38 | 0.01652   |
| <b>Abi2</b>          | 49.39  | 43.01  | -0.20 | 0.0165316 |
| <b>Fam189a1</b>      | 16.78  | 10.79  | -0.64 | 0.0165901 |
| <b>Ipo8</b>          | 13.36  | 10.32  | -0.37 | 0.0166544 |
| <b>Olfm1</b>         | 191.75 | 162.71 | -0.24 | 0.0166841 |
| <b>Farp1</b>         | 53.10  | 39.17  | -0.44 | 0.0167324 |
| <b>Fgf14</b>         | 8.08   | 5.99   | -0.43 | 0.0167552 |
| <b>Rasgrp2</b>       | 118.46 | 91.45  | -0.37 | 0.016849  |
| <b>Daam1</b>         | 34.48  | 30.01  | -0.20 | 0.0170157 |
| <b>Slc9a3r2</b>      | 16.54  | 13.49  | -0.29 | 0.0170932 |
| <b>Shank2</b>        | 18.72  | 14.62  | -0.36 | 0.0171775 |
| <b>Phactr2</b>       | 3.66   | 2.32   | -0.66 | 0.0173048 |
| <b>Car8</b>          | 3.23   | 1.65   | -0.97 | 0.0173993 |
| <b>Lum</b>           | 4.97   | 2.50   | -0.99 | 0.017472  |
| <b>Ptp4a2</b>        | 119.51 | 93.96  | -0.35 | 0.0175931 |
| <b>Pign</b>          | 4.63   | 2.45   | -0.92 | 0.0176467 |
| <b>Pcdhb16</b>       | 1.42   | 0.71   | -1.01 | 0.0177723 |
| <b>Pla2g4e</b>       | 9.74   | 7.23   | -0.43 | 0.0177723 |
| <b>D430036J16Rik</b> | 3.46   | 1.86   | -0.89 | 0.0181198 |
| <b>Camta2</b>        | 15.36  | 12.75  | -0.27 | 0.0181662 |
| <b>Rxrg</b>          | 16.38  | 12.77  | -0.36 | 0.0182503 |
| <b>Sdk2</b>          | 4.52   | 2.08   | -1.12 | 0.0187951 |
| <b>Cd44</b>          | 1.40   | 0.68   | -1.04 | 0.0188642 |
| <b>Sbf2</b>          | 54.87  | 43.68  | -0.33 | 0.0188835 |
| <b>Ankfn1</b>        | 0.91   | 0.29   | -1.65 | 0.0190638 |
| <b>Lancl3</b>        | 2.63   | 1.36   | -0.95 | 0.0192485 |
| <b>Sbf1</b>          | 80.61  | 61.81  | -0.38 | 0.0192485 |
| <b>Me1</b>           | 17.84  | 11.33  | -0.66 | 0.0192507 |
| <b>Canx</b>          | 301.90 | 214.82 | -0.49 | 0.0192507 |
| <b>Sox13</b>         | 7.48   | 4.52   | -0.73 | 0.0193054 |
| <b>Sirpa</b>         | 55.39  | 39.50  | -0.49 | 0.0193432 |
| <b>Klhl29</b>        | 12.99  | 9.92   | -0.39 | 0.0193432 |
| <b>Arhgap31</b>      | 3.55   | 2.14   | -0.73 | 0.0197005 |
| <b>Rsph1</b>         | 4.29   | 2.22   | -0.95 | 0.0200093 |
| <b>Gpr165</b>        | 3.28   | 1.77   | -0.89 | 0.0200093 |
| <b>Wfs1</b>          | 9.14   | 5.66   | -0.69 | 0.0200093 |
| <b>Unc80</b>         | 5.51   | 3.50   | -0.66 | 0.0200093 |
| <b>Ly75</b>          | 1.07   | 0.53   | -1.03 | 0.0200183 |
| <b>Sash1</b>         | 6.13   | 3.79   | -0.70 | 0.0200891 |
| <b>Tnr</b>           | 2.25   | 1.19   | -0.92 | 0.0201855 |
| <b>Nqo1</b>          | 2.77   | 1.22   | -1.18 | 0.020288  |
| <b>Enpp1</b>         | 1.45   | 0.77   | -0.91 | 0.0203197 |
| <b>Dusp3</b>         | 18.32  | 10.61  | -0.79 | 0.0203754 |
| <b>Pcdhb18</b>       | 1.96   | 1.28   | -0.62 | 0.02048   |
| <b>Eps15</b>         | 35.16  | 28.11  | -0.32 | 0.02048   |

|               |        |        |       |           |
|---------------|--------|--------|-------|-----------|
| Zfp445        | 27.15  | 17.93  | -0.60 | 0.0205491 |
| Mapk9         | 41.23  | 34.31  | -0.27 | 0.0206046 |
| Chrna7        | 5.37   | 3.62   | -0.57 | 0.0206402 |
| 2010300C02Rik | 3.85   | 2.34   | -0.72 | 0.0206971 |
| B4galt5       | 48.06  | 30.88  | -0.64 | 0.0213758 |
| 4933411K20Rik | 8.75   | 6.52   | -0.42 | 0.021507  |
| Fras1         | 1.17   | 0.67   | -0.81 | 0.0215219 |
| Ski           | 43.65  | 37.89  | -0.20 | 0.0215219 |
| Gria3         | 16.17  | 10.30  | -0.65 | 0.0215619 |
| Jmy           | 6.93   | 5.31   | -0.39 | 0.0215619 |
| Gjb2          | 3.17   | 1.49   | -1.09 | 0.0217355 |
| Calml4        | 5.57   | 2.56   | -1.12 | 0.0217432 |
| Zmiz1         | 45.86  | 34.32  | -0.42 | 0.0217596 |
| Sema4a        | 48.21  | 36.67  | -0.39 | 0.0217596 |
| Slc12a5       | 47.96  | 38.08  | -0.33 | 0.0220963 |
| Casc4         | 53.84  | 45.14  | -0.25 | 0.0220963 |
| Opr1          | 60.99  | 49.09  | -0.31 | 0.0221711 |
| Kcnd2         | 18.53  | 12.13  | -0.61 | 0.0222274 |
| Cadm2         | 33.06  | 21.93  | -0.59 | 0.0223194 |
| Rgs7bp        | 4.31   | 2.57   | -0.75 | 0.0223427 |
| Zfp715        | 17.22  | 11.30  | -0.61 | 0.0223427 |
| Magi3         | 9.16   | 7.42   | -0.30 | 0.0223427 |
| Cdk14         | 34.60  | 19.32  | -0.84 | 0.0227953 |
| AW555464      | 28.41  | 23.83  | -0.25 | 0.0227953 |
| Neto1         | 10.57  | 6.60   | -0.68 | 0.0228102 |
| Kcnh1         | 2.10   | 1.18   | -0.83 | 0.0235194 |
| Ndufa3        | 687.20 | 411.00 | -0.74 | 0.023566  |
| Mtap1a        | 25.90  | 17.54  | -0.56 | 0.023566  |
| Pde3a         | 1.28   | 0.42   | -1.61 | 0.0237081 |
| Trf           | 3.70   | 1.65   | -1.17 | 0.0237081 |
| Camk2d        | 76.04  | 41.17  | -0.89 | 0.0237081 |
| Dusp8         | 57.49  | 43.53  | -0.40 | 0.0237081 |
| Lpin2         | 23.20  | 16.01  | -0.54 | 0.0238346 |
| Clock         | 4.99   | 3.83   | -0.38 | 0.0241422 |
| Cbr2          | 4.07   | 0.63   | -2.68 | 0.0241995 |
| Kank2         | 3.22   | 2.31   | -0.48 | 0.0242012 |
| C130074G19Rik | 4.50   | 2.45   | -0.88 | 0.0243118 |
| Usp2          | 2.38   | 1.57   | -0.61 | 0.0245514 |
| Fzd4          | 1.34   | 0.64   | -1.06 | 0.0248466 |
| Slco2a1       | 2.68   | 1.73   | -0.63 | 0.0248466 |
| Gng12         | 16.23  | 10.76  | -0.59 | 0.0248466 |
| Usp20         | 25.21  | 16.99  | -0.57 | 0.0249879 |
| Fat1          | 29.75  | 20.58  | -0.53 | 0.0253506 |
| Foxo1         | 6.25   | 3.89   | -0.68 | 0.0254377 |
| Dok6          | 2.11   | 0.91   | -1.21 | 0.0255708 |
| Slc5a6        | 20.30  | 13.28  | -0.61 | 0.0257366 |

|                      |         |         |             |           |
|----------------------|---------|---------|-------------|-----------|
| <b>Bpifa1</b>        | 3.81    | 0.06    | -6.05       | 0.0258431 |
| <b>Scd1</b>          | 15.38   | 10.17   | -0.60       | 0.0260494 |
| <b>2610005L07Rik</b> | 47.58   | 38.91   | -0.29       | 0.0260494 |
| <b>Gprin2</b>        | 3.28    | 1.57    | -1.06       | 0.0261654 |
| <b>Slc17a8</b>       | 1.40    | 0.68    | -1.04       | 0.0262862 |
| <b>Ak7</b>           | 1.73    | 0.85    | -1.03       | 0.0262998 |
| <b>Dixdc1</b>        | 29.84   | 20.75   | -0.52       | 0.0264234 |
| <b>Etv4</b>          | 11.12   | 6.42    | -0.79       | 0.0265915 |
| <b>Kank1</b>         | 4.40    | 2.37    | -0.89       | 0.026699  |
| <b>Cx3cl1</b>        | 21.55   | 14.45   | -0.58       | 0.0273045 |
| <b>Trip11</b>        | 2.16    | 1.19    | -0.86       | 0.0276502 |
| <b>Adcy2</b>         | 9.27    | 5.83    | -0.67       | 0.0276792 |
| <b>Nsf</b>           | 113.60  | 79.84   | -0.51       | 0.0277847 |
| <b>Pnmt</b>          | 3.60    | 0.46    | -2.95       | 0.027809  |
| <b>Ctsh</b>          | 15.35   | 8.00    | -0.94       | 0.027809  |
| <b>Slc40a1</b>       | 6.83    | 4.06    | -0.75       | 0.027809  |
| <b>Lrrc23</b>        | 10.51   | 4.68    | -1.17       | 0.0278303 |
| <b>Ptprt</b>         | 11.79   | 8.01    | -0.56       | 0.0281407 |
| <b>Gnas</b>          | 1231.23 | 1156.36 | -0.09       | 0.0282191 |
| <b>Gnaz</b>          | 26.64   | 23.39   | -0.19       | 0.0285689 |
| <b>Gpr64</b>         | 1.61    | 0.93    | -0.79       | 0.0285742 |
| <b>Sphk1</b>         | 2.19    | 0.74    | -1.57       | 0.0286709 |
| <b>Camk2a</b>        | 24.09   | 16.48   | -0.55       | 0.0287253 |
| <b>Agpat3</b>        | 45.19   | 33.66   | -0.43       | 0.0287253 |
| <b>Pde2a</b>         | 26.16   | 22.44   | -0.22       | 0.0287253 |
| <b>Klhl18</b>        | 20.11   | 14.17   | -0.50       | 0.0288566 |
| <b>Pbx3</b>          | 52.91   | 45.62   | -0.21       | 0.0288971 |
| <b>Tnks2</b>         | 61.48   | 44.72   | -0.46       | 0.029334  |
|                      |         |         | -           |           |
| <b>Ugt2a1</b>        | 0.59    | 0.00    | 1.7977E+308 | 0.0296266 |
| <b>Rnf144b</b>       | 1.35    | 0.67    | -1.00       | 0.0296266 |
| <b>Klhl14</b>        | 1.54    | 0.95    | -0.70       | 0.0296506 |
| <b>Penk</b>          | 19.42   | 12.94   | -0.59       | 0.0296506 |
| <b>Aak1</b>          | 17.49   | 13.15   | -0.41       | 0.0296506 |
| <b>Rbm41</b>         | 4.86    | 2.88    | -0.75       | 0.029756  |
| <b>Ntrk3</b>         | 17.79   | 12.82   | -0.47       | 0.029756  |
| <b>Galnt16</b>       | 5.11    | 2.85    | -0.84       | 0.0299222 |
| <b>Gm12371</b>       | 5.50    | 2.58    | -1.09       | 0.0301107 |
| <b>Trip4</b>         | 18.94   | 13.64   | -0.47       | 0.0302179 |
| <b>Arhgap26</b>      | 14.03   | 9.49    | -0.56       | 0.030262  |
| <b>Gpr17</b>         | 4.10    | 2.40    | -0.77       | 0.0308377 |
| <b>Slc23a2</b>       | 29.46   | 18.20   | -0.69       | 0.0309084 |
| <b>Finc</b>          | 1.65    | 1.29    | -0.35       | 0.0311433 |
| <b>Mapk15</b>        | 9.11    | 4.38    | -1.06       | 0.0312975 |
| <b>Synpo2</b>        | 1.95    | 1.02    | -0.94       | 0.0313255 |
| <b>Luzp2</b>         | 22.44   | 13.04   | -0.78       | 0.0315683 |

|               |        |        |       |           |
|---------------|--------|--------|-------|-----------|
| Gm5454        | 5.38   | 2.79   | -0.95 | 0.031897  |
| Adap1         | 82.88  | 68.28  | -0.28 | 0.031897  |
| Cpne2         | 33.01  | 24.31  | -0.44 | 0.03209   |
| Syncrip       | 89.10  | 75.29  | -0.24 | 0.0321207 |
| Al504432      | 6.80   | 3.87   | -0.81 | 0.0321258 |
| Usp12         | 23.11  | 17.71  | -0.38 | 0.0327642 |
| Prrx1         | 3.03   | 1.88   | -0.69 | 0.0329722 |
| Ror1          | 0.63   | 0.28   | -1.15 | 0.0332157 |
| Pdxk          | 15.98  | 10.62  | -0.59 | 0.0335221 |
| Chml          | 1.71   | 0.75   | -1.18 | 0.0335864 |
| Nr3c1         | 3.38   | 2.13   | -0.67 | 0.0336365 |
| Gpcpd1        | 43.36  | 33.64  | -0.37 | 0.0336365 |
| Tgfb1         | 2.55   | 1.33   | -0.94 | 0.0336571 |
| Parm1         | 3.41   | 1.99   | -0.78 | 0.0336808 |
| Pla2g3        | 3.28   | 2.06   | -0.67 | 0.0336943 |
| Dclk1         | 119.34 | 102.44 | -0.22 | 0.0337529 |
| Itpr2         | 3.18   | 1.10   | -1.53 | 0.0339195 |
| Dhrs3         | 9.56   | 6.29   | -0.60 | 0.0339741 |
| Olig1         | 28.88  | 18.78  | -0.62 | 0.0341224 |
| Stard4        | 12.38  | 8.05   | -0.62 | 0.0341502 |
| Msx1          | 3.38   | 1.72   | -0.97 | 0.0342556 |
| Ptpn11        | 38.85  | 32.75  | -0.25 | 0.0351279 |
| Npy1r         | 6.22   | 3.66   | -0.76 | 0.0353586 |
| Tm9sf3        | 52.28  | 43.57  | -0.26 | 0.0353586 |
| D18Ert653e    | 4.99   | 3.12   | -0.68 | 0.0354241 |
| Ucp2          | 33.95  | 23.53  | -0.53 | 0.0354281 |
| Ap1g1         | 42.80  | 31.78  | -0.43 | 0.0354281 |
| Nrsn1         | 26.20  | 21.16  | -0.31 | 0.0356761 |
| Nckap1        | 141.79 | 117.48 | -0.27 | 0.0356761 |
| Pbrm1         | 32.01  | 24.75  | -0.37 | 0.0357007 |
| Grm4          | 7.19   | 4.58   | -0.65 | 0.0357719 |
| Matn4         | 2.10   | 1.04   | -1.01 | 0.0357801 |
| 9930021J03Rik | 4.65   | 2.41   | -0.95 | 0.0359307 |
| Gatm          | 19.83  | 13.19  | -0.59 | 0.0359307 |
| Dmrt2         | 0.71   | 0.19   | -1.91 | 0.0360744 |
| Cep350        | 8.51   | 5.54   | -0.62 | 0.0360744 |
| Tcerg1l       | 23.29  | 16.10  | -0.53 | 0.0360744 |
| Arhgap5       | 10.61  | 7.05   | -0.59 | 0.0361771 |
| Rap1gap       | 78.17  | 62.82  | -0.32 | 0.0363099 |
| Gpr155        | 8.32   | 4.91   | -0.76 | 0.0364451 |
| F13a1         | 5.96   | 3.56   | -0.74 | 0.0364659 |
| Plp1          | 11.62  | 8.17   | -0.51 | 0.0364659 |
| Oprk1         | 1.17   | 0.50   | -1.24 | 0.0367363 |
| Mlf1          | 10.31  | 5.95   | -0.79 | 0.0370549 |
| Zcchc14       | 59.23  | 46.95  | -0.34 | 0.0370549 |
| Dzip3         | 53.78  | 44.04  | -0.29 | 0.0370549 |



|               |        |       | -           |           |
|---------------|--------|-------|-------------|-----------|
| Cga           | 1.13   | 0.00  | 1.7977E+308 | 0.0375609 |
| Tgfb1i1       | 9.29   | 6.85  | -0.44       | 0.038006  |
| Steap3        | 1.33   | 0.60  | -1.14       | 0.0383295 |
| Bgn           | 27.92  | 18.85 | -0.57       | 0.0385291 |
| Prkg1         | 0.94   | 0.33  | -1.50       | 0.0385405 |
| Pclo          | 4.92   | 3.61  | -0.45       | 0.0385405 |
| Jmjd4         | 8.32   | 6.71  | -0.31       | 0.0385405 |
| Pecam1        | 12.82  | 9.33  | -0.46       | 0.0385568 |
| Ide           | 16.13  | 11.10 | -0.54       | 0.0387559 |
| Ilf6st        | 10.06  | 6.64  | -0.60       | 0.0389417 |
| Kifc3         | 13.08  | 10.78 | -0.28       | 0.0389582 |
| Krt8          | 1.24   | 0.49  | -1.33       | 0.0391047 |
| Col8a1        | 1.52   | 0.77  | -0.98       | 0.0391215 |
| Zfp800        | 4.45   | 2.90  | -0.61       | 0.039698  |
| Cyp1b1        | 2.16   | 1.20  | -0.85       | 0.0398298 |
| Rel2          | 83.14  | 66.57 | -0.32       | 0.0400219 |
| Epb4.9        | 43.32  | 38.44 | -0.17       | 0.0400219 |
| Gm2792        | 2.01   | 0.94  | -1.10       | 0.0401883 |
| C030034L19Rik | 1.95   | 1.11  | -0.81       | 0.0404255 |
| Gpatch2       | 7.18   | 5.62  | -0.35       | 0.0405022 |
| AF064781      | 4.15   | 2.43  | -0.77       | 0.0405467 |
| Stard7        | 118.70 | 94.96 | -0.32       | 0.0408102 |
| Adcy8         | 3.58   | 2.09  | -0.77       | 0.0409011 |
| Fam46a        | 1.44   | 0.74  | -0.97       | 0.0412604 |
| Zzz3          | 20.50  | 16.62 | -0.30       | 0.0414835 |
| Slc7a14       | 5.43   | 3.58  | -0.60       | 0.041861  |
| Aars          | 77.02  | 55.67 | -0.47       | 0.0426033 |
| Calu          | 100.30 | 82.76 | -0.28       | 0.0432979 |
| Rin2          | 9.64   | 5.31  | -0.86       | 0.0433619 |
| Frmpd1        | 1.37   | 0.65  | -1.08       | 0.0440111 |
| Slitrk6       | 2.16   | 1.16  | -0.89       | 0.0440886 |
| Map3k1        | 6.31   | 4.21  | -0.58       | 0.0440886 |
| Lgr4          | 5.92   | 4.76  | -0.31       | 0.0440886 |
| Dynlrb2       | 8.12   | 3.60  | -1.17       | 0.0445902 |
| A830010M20Rik | 19.88  | 16.18 | -0.30       | 0.0445902 |
| Prickle2      | 9.63   | 6.80  | -0.50       | 0.0446613 |
| St6galnac5    | 15.21  | 10.44 | -0.54       | 0.0447256 |
| Lhfp12        | 11.01  | 6.45  | -0.77       | 0.0447354 |
| Pcx           | 12.96  | 8.85  | -0.55       | 0.0447354 |
| Klhl23        | 52.75  | 37.99 | -0.47       | 0.0447553 |
| Usp29         | 12.62  | 7.98  | -0.66       | 0.045053  |
| Mboat7        | 70.22  | 57.20 | -0.30       | 0.0460286 |
| Erap1         | 1.53   | 0.97  | -0.66       | 0.0471171 |
| Tll1          | 1.25   | 0.65  | -0.95       | 0.0471523 |
| Syn2          | 38.01  | 28.47 | -0.42       | 0.0471523 |

|                      |       |       |       |           |
|----------------------|-------|-------|-------|-----------|
| <b>Sstr4</b>         | 1.48  | 0.62  | -1.24 | 0.047182  |
| <b>Vcl</b>           | 8.17  | 6.43  | -0.35 | 0.047182  |
| <b>Mtss1l</b>        | 89.55 | 70.83 | -0.34 | 0.047353  |
| <b>6230409E13Rik</b> | 21.67 | 15.96 | -0.44 | 0.0475491 |
| <b>Mmp15</b>         | 14.69 | 12.05 | -0.29 | 0.0475491 |
| <b>Gbp9</b>          | 0.70  | 0.31  | -1.18 | 0.0477194 |
| <b>Car2</b>          | 6.74  | 3.80  | -0.83 | 0.0478068 |
| <b>Kitl</b>          | 39.91 | 28.71 | -0.48 | 0.047868  |
| <b>Kit</b>           | 26.76 | 18.04 | -0.57 | 0.0482645 |
| <b>Cmtm4</b>         | 7.92  | 4.37  | -0.86 | 0.0490934 |
| <b>Gpr126</b>        | 0.69  | 0.35  | -0.98 | 0.0491188 |
| <b>Got1</b>          | 63.14 | 50.84 | -0.31 | 0.0492339 |
| <b>Syt1</b>          | 70.57 | 51.01 | -0.47 | 0.049624  |
| <b>Kcnt1</b>         | 27.31 | 20.67 | -0.40 | 0.049624  |
| <b>Klf7</b>          | 23.17 | 16.55 | -0.49 | 0.0499885 |

Genes significantly up-regulated in SA1 KO

| <b>gene</b>     | <b>E17.5 WT (FPKM)</b> | <b>E17.5 KO (FPKM)</b> | <b>log2 (fold change)</b> | <b>FDR</b>  |
|-----------------|------------------------|------------------------|---------------------------|-------------|
| <b>Eef1a1</b>   | 5273.15                | 6258.95                | 0.25                      | 0           |
| <b>Rbm3</b>     | 131.71                 | 156.67                 | 0.25                      | 0           |
| <b>Gm15500</b>  | 191.61                 | 263.55                 | 0.46                      | 0           |
| <b>Rasgef1b</b> | 23.56                  | 33.67                  | 0.52                      | 0           |
| <b>Pgk1</b>     | 83.46                  | 121.53                 | 0.54                      | 0           |
| <b>Eno1</b>     | 407.85                 | 599.47                 | 0.56                      | 0           |
| <b>Gas5</b>     | 424.09                 | 749.94                 | 0.82                      | 0           |
| <b>Gm13841</b>  | 26.38                  | 92.89                  | 1.82                      | 0           |
| <b>Kdm3a</b>    | 21.49                  | 33.86                  | 0.66                      | 6.63036E-13 |
| <b>Tpi1</b>     | 227.85                 | 350.82                 | 0.62                      | 1.05244E-12 |
| <b>Rpl7</b>     | 652.77                 | 913.34                 | 0.48                      | 7.10396E-12 |
| <b>Rps3</b>     | 386.65                 | 502.14                 | 0.38                      | 2.40166E-11 |
| <b>Rplp0</b>    | 444.56                 | 628.50                 | 0.50                      | 4.30974E-11 |
| <b>Pfkfb3</b>   | 23.37                  | 30.69                  | 0.39                      | 1.49783E-10 |
| <b>Xist</b>     | 135.04                 | 286.73                 | 1.09                      | 5.52411E-10 |
| <b>Btf3</b>     | 320.24                 | 392.09                 | 0.29                      | 1.51294E-09 |
| <b>Igfbpl1</b>  | 156.66                 | 246.46                 | 0.65                      | 1.95745E-09 |
| <b>P4ha1</b>    | 16.21                  | 25.40                  | 0.65                      | 2.28848E-09 |
| <b>Gm11512</b>  | 74.75                  | 167.71                 | 1.17                      | 5.36498E-09 |
| <b>Rpl10</b>    | 240.16                 | 294.98                 | 0.30                      | 1.2102E-08  |
| <b>Tiam2</b>    | 27.85                  | 38.93                  | 0.48                      | 1.48052E-08 |
| <b>Eef1b2</b>   | 837.01                 | 1092.80                | 0.38                      | 3.87283E-08 |
| <b>Rpl21</b>    | 44.12                  | 82.32                  | 0.90                      | 4.29041E-08 |
| <b>Rpl5</b>     | 193.31                 | 261.23                 | 0.43                      | 4.39957E-08 |

|                      |         |         |      |             |
|----------------------|---------|---------|------|-------------|
| <b>Rps5</b>          | 773.09  | 1009.72 | 0.39 | 4.7164E-08  |
| <b>Mid1</b>          | 78.70   | 141.72  | 0.85 | 7.89278E-08 |
| <b>Mapk1ip1</b>      | 27.39   | 37.33   | 0.45 | 1.13792E-07 |
| <b>Gm13699</b>       | 100.85  | 142.79  | 0.50 | 4.58589E-07 |
| <b>Rps6</b>          | 204.34  | 258.53  | 0.34 | 7.06614E-07 |
| <b>2610035D17Rik</b> | 8.88    | 14.73   | 0.73 | 1.37658E-06 |
| <b>Gm15427</b>       | 270.84  | 357.57  | 0.40 | 1.57778E-06 |
| <b>Rps17</b>         | 525.43  | 775.16  | 0.56 | 1.61292E-06 |
| <b>Jmjd6</b>         | 31.59   | 41.74   | 0.40 | 2.25672E-06 |
| <b>Rps15</b>         | 845.44  | 1140.20 | 0.43 | 2.56433E-06 |
| <b>Stmn1</b>         | 2150.77 | 2478.88 | 0.20 | 2.73621E-06 |
| <b>Cdk2ap1</b>       | 100.37  | 130.83  | 0.38 | 3.81089E-06 |
| <b>Rps15-ps2</b>     | 211.54  | 364.81  | 0.79 | 4.01717E-06 |
| <b>Nme2</b>          | 7.20    | 24.60   | 1.77 | 4.07109E-06 |
| <b>Rpl38</b>         | 427.21  | 559.15  | 0.39 | 5.08741E-06 |
| <b>Rps19</b>         | 376.49  | 485.30  | 0.37 | 5.20251E-06 |
| <b>Fis1</b>          | 138.06  | 175.21  | 0.34 | 5.95956E-06 |
| <b>Neurog2</b>       | 11.97   | 24.37   | 1.03 | 6.32632E-06 |
| <b>Commd3</b>        | 176.64  | 232.82  | 0.40 | 6.46149E-06 |
| <b>Gm4997</b>        | 121.89  | 219.84  | 0.85 | 8.9719E-06  |
| <b>Emx1</b>          | 10.77   | 19.53   | 0.86 | 1.04862E-05 |
| <b>Scnm1</b>         | 46.53   | 66.67   | 0.52 | 1.26216E-05 |
| <b>Gm1673</b>        | 118.50  | 151.98  | 0.36 | 1.32997E-05 |
| <b>Hdac2</b>         | 253.48  | 319.14  | 0.33 | 0.000016327 |
| <b>Rpl30</b>         | 341.76  | 522.27  | 0.61 | 1.80748E-05 |
| <b>Gapdh</b>         | 22.31   | 44.21   | 0.99 | 2.65669E-05 |
| <b>Gm8210</b>        | 66.90   | 133.79  | 1.00 | 2.71569E-05 |
| <b>Pafah1b3</b>      | 239.71  | 308.28  | 0.36 | 3.13329E-05 |
| <b>Uqcrh</b>         | 264.13  | 362.09  | 0.46 | 3.76495E-05 |
| <b>Akap8l</b>        | 32.71   | 40.64   | 0.31 | 4.51672E-05 |
| <b>Sla</b>           | 37.44   | 45.54   | 0.28 | 5.18073E-05 |
| <b>Prdm8</b>         | 17.44   | 23.23   | 0.41 | 5.18073E-05 |
| <b>Anp32a</b>        | 312.34  | 422.65  | 0.44 | 5.64899E-05 |
| <b>Gm12322</b>       | 18.14   | 49.42   | 1.45 | 5.85574E-05 |
| <b>Pisd-ps1</b>      | 274.77  | 350.96  | 0.35 | 6.50768E-05 |
| <b>Rpl27a-ps2</b>    | 7.47    | 24.34   | 1.70 | 7.51821E-05 |
| <b>Eomes</b>         | 15.41   | 24.80   | 0.69 | 8.19471E-05 |
| <b>Rpl35a</b>        | 196.43  | 316.58  | 0.69 | 8.19471E-05 |
| <b>Rpl23</b>         | 790.35  | 1027.45 | 0.38 | 8.24828E-05 |
| <b>Neurod1</b>       | 18.21   | 24.81   | 0.45 | 0.000101984 |
| <b>Gm8430</b>        | 259.98  | 340.97  | 0.39 | 0.000110427 |
| <b>BC004004</b>      | 40.48   | 55.79   | 0.46 | 0.00014662  |
| <b>Ldha</b>          | 213.05  | 311.08  | 0.55 | 0.00014722  |
| <b>Ppp2r2b</b>       | 105.51  | 125.09  | 0.25 | 0.000160958 |
| <b>Rpl11</b>         | 476.52  | 601.11  | 0.34 | 0.000163974 |
| <b>Hscb</b>          | 4.61    | 11.52   | 1.32 | 0.000199064 |

|               |         |         |           |             |
|---------------|---------|---------|-----------|-------------|
| Rpl18         | 493.45  | 649.37  | 0.40      | 0.000210484 |
| Gm12901       | 14.49   | 34.46   | 1.25      | 0.000239611 |
| Gm11223       | 1964.08 | 2573.32 | 0.39      | 0.000248273 |
| H3f3a         | 526.61  | 666.36  | 0.34      | 0.000265578 |
| Rpl7a         | 98.22   | 126.55  | 0.37      | 0.000274606 |
| Gpi1          | 114.94  | 163.95  | 0.51      | 0.000279987 |
| 1500012F01Rik | 88.33   | 122.32  | 0.47      | 0.000287214 |
| Rpl12         | 189.49  | 236.08  | 0.32      | 0.00029506  |
| Rpl28         | 217.95  | 293.89  | 0.43      | 0.000321834 |
| Ddit4         | 50.69   | 84.25   | 0.73      | 0.000361018 |
| D430001F17Rik | 0.51    | 2.08    | 2.03      | 0.000414534 |
| Ldb1          | 127.80  | 153.50  | 0.26      | 0.000432673 |
| Gm10072       | 180.96  | 247.31  | 0.45      | 0.000440713 |
| Orc6          | 22.81   | 29.84   | 0.39      | 0.00048507  |
| Rps24         | 630.65  | 932.98  | 0.56      | 0.00048507  |
| Rpl21-ps15    | 2.73    | 10.68   | 1.97      | 0.00048507  |
| Gm11972       | 15.95   | 40.79   | 1.35      | 0.000545395 |
| Cct3          | 230.12  | 296.89  | 0.37      | 0.000591445 |
| D930015E06Rik | 30.12   | 35.89   | 0.25      | 0.000658074 |
| Polr3gl       | 29.64   | 45.48   | 0.62      | 0.000673335 |
| Mdk           | 68.09   | 88.56   | 0.38      | 0.000687101 |
| Cdk4          | 448.26  | 561.23  | 0.32      | 0.000698593 |
| 6720416L17Rik | 0.00    | 0.48    | 1,79E+308 | 0.000700714 |
| Rpl18-ps2     | 124.83  | 156.26  | 0.32      | 0.00073073  |
| Ptprh         | 0.34    | 1.19    | 1.81      | 0.00073073  |
| Hnrnpa1       | 200.97  | 238.55  | 0.25      | 0.000740139 |
| Cabp1         | 25.25   | 36.44   | 0.53      | 0.000768562 |
| Zfp821        | 49.95   | 60.35   | 0.27      | 0.000902248 |
| Mad2l2        | 72.63   | 107.12  | 0.56      | 0.000943281 |
| Pdcd5         | 123.63  | 160.14  | 0.37      | 0.00102671  |
| Gm11671       | 21.21   | 47.15   | 1.15      | 0.0010475   |
| Rps2          | 127.48  | 171.58  | 0.43      | 0.00109081  |
| Zfp637        | 63.30   | 86.81   | 0.46      | 0.00109081  |
| Gnb2l1        | 999.81  | 1304.37 | 0.38      | 0.00134019  |
| Ppia          | 513.01  | 603.02  | 0.23      | 0.00141013  |
| Rbm17         | 98.04   | 127.33  | 0.38      | 0.00141634  |
| Chtf8         | 43.90   | 50.85   | 0.21      | 0.00142446  |
| Pkm2          | 325.15  | 407.57  | 0.33      | 0.00159545  |
| Pla2g4b       | 12.13   | 19.43   | 0.68      | 0.00173609  |
| Mcm7          | 52.98   | 67.52   | 0.35      | 0.00179915  |
| 5930416I19Rik | 41.97   | 56.42   | 0.43      | 0.00186516  |
| H2afz         | 311.45  | 383.11  | 0.30      | 0.00186713  |
| Pdpf          | 132.06  | 162.01  | 0.29      | 0.00191322  |
| Rpl13a        | 3134.36 | 4313.25 | 0.46      | 0.00191537  |
| Pfdn5         | 359.49  | 478.93  | 0.41      | 0.001938    |
| Hnrpdl        | 201.92  | 220.68  | 0.13      | 0.00205304  |

|                      |        |         |      |            |
|----------------------|--------|---------|------|------------|
| <b>Dynll1</b>        | 428.32 | 508.72  | 0.25 | 0.0021574  |
| <b>Smarca2</b>       | 99.59  | 119.67  | 0.26 | 0.00236003 |
| <b>Prex2</b>         | 2.73   | 4.56    | 0.74 | 0.00237532 |
| <b>Cyth2</b>         | 112.44 | 133.37  | 0.25 | 0.0023993  |
| <b>Ap2s1</b>         | 180.93 | 211.46  | 0.22 | 0.00241747 |
| <b>Nsmce4a</b>       | 49.34  | 65.94   | 0.42 | 0.00242913 |
| <b>Gabarap</b>       | 265.29 | 325.99  | 0.30 | 0.002441   |
| <b>Calcoco1</b>      | 44.08  | 56.44   | 0.36 | 0.00244937 |
| <b>Gm10163</b>       | 14.37  | 30.16   | 1.07 | 0.00268989 |
| <b>Ddah2</b>         | 233.73 | 304.35  | 0.38 | 0.00270118 |
| <b>Rpl10a-ps1</b>    | 279.90 | 328.95  | 0.23 | 0.00286635 |
| <b>Dync1i1</b>       | 41.01  | 49.19   | 0.26 | 0.00290162 |
| <b>Rpl27a</b>        | 165.74 | 209.60  | 0.34 | 0.00295083 |
| <b>Igsf8</b>         | 54.43  | 77.41   | 0.51 | 0.00298864 |
| <b>D4Wsu53e</b>      | 412.78 | 496.02  | 0.27 | 0.00307869 |
| <b>1110038B12Rik</b> | 76.13  | 99.32   | 0.38 | 0.00310865 |
| <b>Rpl35a-ps2</b>    | 169.67 | 227.72  | 0.42 | 0.00315298 |
| <b>Gm7973</b>        | 12.55  | 27.99   | 1.16 | 0.00322317 |
| <b>Stmn4</b>         | 494.47 | 576.74  | 0.22 | 0.00360864 |
| <b>Eif3m</b>         | 67.04  | 85.69   | 0.35 | 0.00383898 |
| <b>Rps18</b>         | 411.83 | 531.29  | 0.37 | 0.00383898 |
| <b>Gm14059</b>       | 148.62 | 203.01  | 0.45 | 0.00393912 |
| <b>H3f3b</b>         | 518.32 | 660.40  | 0.35 | 0.00405311 |
| <b>Pdap1</b>         | 124.88 | 162.12  | 0.38 | 0.00414866 |
| <b>Hdac5</b>         | 102.06 | 129.67  | 0.35 | 0.00455628 |
| <b>Nae1</b>          | 64.60  | 82.21   | 0.35 | 0.00455628 |
| <b>Hist3h2ba</b>     | 69.87  | 113.84  | 0.70 | 0.00473674 |
| <b>Ier5</b>          | 16.89  | 26.56   | 0.65 | 0.00503189 |
| <b>Idh2</b>          | 102.07 | 130.35  | 0.35 | 0.00503202 |
| <b>Gm17352</b>       | 28.07  | 54.79   | 0.96 | 0.00504399 |
| <b>Gm15531</b>       | 36.57  | 87.74   | 1.26 | 0.00534692 |
| <b>Rps29</b>         | 704.18 | 1054.58 | 0.58 | 0.00563331 |
| <b>Ybx1</b>          | 902.04 | 992.65  | 0.14 | 0.00568932 |
| <b>Fezf2</b>         | 18.24  | 29.16   | 0.68 | 0.00570146 |
| <b>Gm16020</b>       | 95.27  | 189.25  | 0.99 | 0.00580394 |
| <b>Rpl35</b>         | 297.31 | 398.73  | 0.42 | 0.0064883  |
| <b>Rpl34-ps1</b>     | 250.70 | 320.04  | 0.35 | 0.00667524 |
| <b>Rps4x</b>         | 548.18 | 749.40  | 0.45 | 0.00682973 |
| <b>Gm6136</b>        | 165.68 | 194.17  | 0.23 | 0.00739239 |
| <b>Gm13268</b>       | 145.65 | 180.42  | 0.31 | 0.00760266 |
| <b>mt-Tq</b>         | 935.12 | 2673.05 | 1.52 | 0.00797667 |
| <b>Rcor2</b>         | 62.80  | 85.54   | 0.45 | 0.00803985 |
| <b>Snrnp70</b>       | 210.68 | 247.39  | 0.23 | 0.00876685 |
| <b>Fam107b</b>       | 23.21  | 27.28   | 0.23 | 0.00894823 |
| <b>3110003A17Rik</b> | 49.73  | 79.37   | 0.67 | 0.00912756 |
| <b>Gm5506</b>        | 81.03  | 119.67  | 0.56 | 0.00955723 |

|                      |         |         |      |            |
|----------------------|---------|---------|------|------------|
| <b>Schip1</b>        | 99.69   | 116.19  | 0.22 | 0.00983858 |
| <b>Foxg1</b>         | 99.65   | 135.58  | 0.44 | 0.0101789  |
| <b>Fam89b</b>        | 44.57   | 59.72   | 0.42 | 0.0102637  |
| <b>Gm13654</b>       | 210.71  | 268.27  | 0.35 | 0.0107671  |
| <b>Ldha-ps2</b>      | 10.65   | 19.04   | 0.84 | 0.010899   |
| <b>Pabpc1</b>        | 318.67  | 373.59  | 0.23 | 0.0111994  |
| <b>Serinc2</b>       | 19.73   | 25.47   | 0.37 | 0.0115326  |
| <b>Akr1a4</b>        | 378.43  | 447.86  | 0.24 | 0.0121104  |
| <b>Rpl36a</b>        | 352.89  | 503.78  | 0.51 | 0.0121352  |
| <b>Nasp</b>          | 98.04   | 114.16  | 0.22 | 0.0123668  |
| <b>Paip2</b>         | 157.51  | 185.98  | 0.24 | 0.0124056  |
| <b>Gm15772</b>       | 280.63  | 335.66  | 0.26 | 0.0131855  |
| <b>0610007P22Rik</b> | 23.33   | 31.97   | 0.45 | 0.0135088  |
| <b>Gm11266</b>       | 9.60    | 16.75   | 0.80 | 0.0138739  |
| <b>Apex1</b>         | 83.50   | 100.06  | 0.26 | 0.013958   |
| <b>Rpl17-ps4</b>     | 45.09   | 73.27   | 0.70 | 0.0142007  |
| <b>Gm11868</b>       | 7.87    | 11.09   | 0.50 | 0.0147684  |
| <b>Gm11703</b>       | 17.52   | 32.72   | 0.90 | 0.0147684  |
| <b>Aldoa</b>         | 229.57  | 269.49  | 0.23 | 0.0147744  |
| <b>Rpl21-ps10</b>    | 0.90    | 4.73    | 2.39 | 0.014801   |
| <b>Ypel4</b>         | 15.95   | 21.60   | 0.44 | 0.0150321  |
| <b>Hk2</b>           | 3.06    | 7.63    | 1.32 | 0.0153053  |
| <b>BC025920</b>      | 2.93    | 5.64    | 0.94 | 0.0153231  |
| <b>Npm1</b>          | 313.36  | 394.71  | 0.33 | 0.0157166  |
| <b>Hmgb1</b>         | 110.82  | 130.97  | 0.24 | 0.0158539  |
| <b>Gm14456</b>       | 1088.03 | 1289.07 | 0.24 | 0.0158885  |
| <b>Gm4604</b>        | 91.46   | 148.54  | 0.70 | 0.0160758  |
| <b>2700094K13Rik</b> | 78.59   | 94.97   | 0.27 | 0.0160822  |
| <b>Gm10155</b>       | 14.48   | 27.68   | 0.94 | 0.0163392  |
| <b>Thra</b>          | 554.98  | 626.79  | 0.18 | 0.0163426  |
| <b>Psm7</b>          | 299.69  | 393.07  | 0.39 | 0.0164869  |
| <b>Cirbp</b>         | 193.17  | 237.37  | 0.30 | 0.0166544  |
| <b>Gm9104</b>        | 3.21    | 8.97    | 1.48 | 0.0167552  |
| <b>Lix1</b>          | 8.59    | 12.79   | 0.57 | 0.0171775  |
| <b>Gm3511</b>        | 123.25  | 203.15  | 0.72 | 0.0177427  |
| <b>Neurod6</b>       | 145.42  | 211.46  | 0.54 | 0.0182244  |
| <b>Ranbp1</b>        | 119.92  | 137.27  | 0.19 | 0.0183093  |
| <b>Cdkn1b</b>        | 42.55   | 53.58   | 0.33 | 0.0183093  |
| <b>Sh3yl1</b>        | 20.86   | 24.79   | 0.25 | 0.0184647  |
| <b>Ndufc2</b>        | 156.62  | 195.16  | 0.32 | 0.0190638  |
| <b>Gng10</b>         | 79.69   | 94.18   | 0.24 | 0.0193213  |
| <b>Psme1</b>         | 187.18  | 225.60  | 0.27 | 0.0195751  |
| <b>Pqbp1</b>         | 110.26  | 133.50  | 0.28 | 0.0203197  |
| <b>Rps16</b>         | 292.13  | 372.75  | 0.35 | 0.0203197  |
| <b>Smug1</b>         | 8.87    | 13.75   | 0.63 | 0.0203604  |
| <b>Hmgn2</b>         | 162.15  | 183.47  | 0.18 | 0.02048    |

|                      |         |         |      |           |
|----------------------|---------|---------|------|-----------|
| <b>Prmt1</b>         | 262.29  | 301.68  | 0.20 | 0.0213599 |
| <b>Rps23</b>         | 275.57  | 389.50  | 0.50 | 0.0213599 |
| <b>0610010K14Rik</b> | 97.18   | 115.17  | 0.24 | 0.0215219 |
| <b>Gm15032</b>       | 35.49   | 62.69   | 0.82 | 0.0215219 |
| <b>Hnrnpc</b>        | 162.23  | 205.37  | 0.34 | 0.0229624 |
| <b>Uckl1</b>         | 55.93   | 71.01   | 0.34 | 0.0231137 |
| <b>Safb2</b>         | 109.89  | 131.67  | 0.26 | 0.0235131 |
| <b>Gm15454</b>       | 59.41   | 79.88   | 0.43 | 0.023695  |
| <b>Pnrc1</b>         | 39.47   | 52.73   | 0.42 | 0.0237081 |
| <b>Hoxb5</b>         | 0.04    | 1.30    | 5.14 | 0.0237081 |
| <b>Gm10293</b>       | 5.56    | 10.14   | 0.87 | 0.0237975 |
| <b>Rps21</b>         | 624.97  | 890.43  | 0.51 | 0.0243461 |
| <b>Rpl26</b>         | 392.95  | 520.40  | 0.41 | 0.0253879 |
| <b>Tmsb4x</b>        | 1881.71 | 2220.34 | 0.24 | 0.0254308 |
| <b>Mex3d</b>         | 35.26   | 40.80   | 0.21 | 0.0254377 |
| <b>Gm11826</b>       | 138.42  | 176.75  | 0.35 | 0.0262862 |
| <b>Tpt1</b>          | 1349.03 | 1750.47 | 0.38 | 0.0262862 |
| <b>Hoxb3os</b>       | 0.17    | 1.05    | 2.59 | 0.0262862 |
| <b>Gm14648</b>       | 5.20    | 11.75   | 1.18 | 0.0263753 |
| <b>Fus</b>           | 772.31  | 899.99  | 0.22 | 0.027988  |
| <b>Fam118b</b>       | 31.35   | 39.69   | 0.34 | 0.0281407 |
| <b>Map2k5</b>        | 15.64   | 19.27   | 0.30 | 0.0282815 |
| <b>Zfp428</b>        | 67.42   | 78.13   | 0.21 | 0.0285167 |
| <b>Al413582</b>      | 13.78   | 19.91   | 0.53 | 0.0289112 |
| <b>Rps14</b>         | 845.28  | 995.26  | 0.24 | 0.0289146 |
| <b>Gm10196</b>       | 133.01  | 203.07  | 0.61 | 0.0289669 |
| <b>Phyhd1</b>        | 18.94   | 28.26   | 0.58 | 0.0294189 |
| <b>2310014H01Rik</b> | 20.10   | 22.76   | 0.18 | 0.0297221 |
| <b>Rpl18a</b>        | 125.18  | 176.73  | 0.50 | 0.0299066 |
| <b>Hoxa5</b>         | 0.02    | 1.85    | 6.38 | 0.0300899 |
| <b>Rpl15</b>         | 165.60  | 199.21  | 0.27 | 0.0302636 |
| <b>Insm1</b>         | 21.24   | 30.87   | 0.54 | 0.0304425 |
| <b>C130071C03Rik</b> | 81.78   | 105.04  | 0.36 | 0.0306527 |
| <b>Rpl24</b>         | 301.17  | 410.91  | 0.45 | 0.0309923 |
| <b>Lhx2</b>          | 77.63   | 103.81  | 0.42 | 0.031897  |
| <b>Neb</b>           | 3.18    | 5.30    | 0.74 | 0.0327809 |
| <b>Bud31</b>         | 109.72  | 134.72  | 0.30 | 0.0331292 |
| <b>Rpl6</b>          | 553.58  | 702.68  | 0.34 | 0.0332911 |
| <b>Rpl9</b>          | 128.33  | 166.76  | 0.38 | 0.0333364 |
| <b>Erh</b>           | 164.79  | 210.08  | 0.35 | 0.0335745 |
| <b>Med28</b>         | 104.99  | 125.27  | 0.25 | 0.0336571 |
| <b>Rpl36-ps3</b>     | 85.82   | 135.32  | 0.66 | 0.034438  |
| <b>Wnt7b</b>         | 25.24   | 30.26   | 0.26 | 0.0349126 |
| <b>Rpl31</b>         | 98.30   | 139.83  | 0.51 | 0.0349126 |
| <b>Gm17511</b>       | 99.22   | 148.67  | 0.58 | 0.035     |
| <b>Ldhb</b>          | 150.12  | 176.27  | 0.23 | 0.0353586 |

|                      |        |         |           |           |
|----------------------|--------|---------|-----------|-----------|
| <b>Rhebl1</b>        | 21.13  | 28.68   | 0.44      | 0.0356761 |
| <b>Gm13882</b>       | 12.64  | 20.27   | 0.68      | 0.0357428 |
| <b>Rps26</b>         | 500.98 | 702.67  | 0.49      | 0.0359307 |
| <b>Gm7363</b>        | 39.97  | 67.76   | 0.76      | 0.0359307 |
| <b>Gm16042</b>       | 4.19   | 8.42    | 1.01      | 0.0359307 |
| <b>Snhg1</b>         | 12.05  | 15.96   | 0.41      | 0.0368521 |
| <b>Gm3940</b>        | 104.46 | 158.14  | 0.60      | 0.0370396 |
| <b>Rpl21-ps8</b>     | 36.83  | 57.87   | 0.65      | 0.0370549 |
| <b>Gm8158</b>        | 36.04  | 59.60   | 0.73      | 0.0376613 |
| <b>Rpl32</b>         | 838.93 | 1162.41 | 0.47      | 0.0379544 |
| <b>Gm9294</b>        | 111.51 | 159.43  | 0.52      | 0.0380319 |
| <b>Slc16a3</b>       | 3.56   | 7.46    | 1.06      | 0.0380319 |
| <b>Ndufaf2</b>       | 35.17  | 46.17   | 0.39      | 0.0381382 |
| <b>Zc4h2</b>         | 31.52  | 36.28   | 0.20      | 0.038775  |
| <b>Gm13653</b>       | 2.77   | 7.37    | 1.41      | 0.0388468 |
| <b>Hist3h2a</b>      | 30.98  | 44.64   | 0.53      | 0.0389417 |
| <b>Krtap13</b>       | 0.00   | 0.62    | 1,79E+308 | 0.0405467 |
| <b>Rps27a</b>        | 218.89 | 290.15  | 0.41      | 0.0416236 |
| <b>Emg1</b>          | 65.74  | 77.07   | 0.23      | 0.0420638 |
| <b>Rpl36</b>         | 148.29 | 219.85  | 0.57      | 0.0420638 |
| <b>Gm10241</b>       | 170.26 | 218.52  | 0.36      | 0.0430309 |
| <b>Gm16832</b>       | 3.81   | 6.69    | 0.81      | 0.0430309 |
| <b>Uqcrq</b>         | 184.88 | 239.40  | 0.37      | 0.0432907 |
| <b>Gm14633</b>       | 46.30  | 73.98   | 0.68      | 0.0434498 |
| <b>Orc1</b>          | 0.92   | 7.82    | 3.08      | 0.0436301 |
| <b>Rpl30-ps9</b>     | 19.97  | 34.89   | 0.81      | 0.0440886 |
| <b>Miip</b>          | 21.49  | 28.88   | 0.43      | 0.0450081 |
| <b>B230206F22Rik</b> | 5.22   | 6.97    | 0.42      | 0.0452812 |
| <b>Nap111</b>        | 144.59 | 161.42  | 0.16      | 0.0456273 |
| <b>Usf1</b>          | 157.80 | 201.83  | 0.36      | 0.0457732 |
| <b>Pisd-ps2</b>      | 71.90  | 94.00   | 0.39      | 0.0475491 |
| <b>Gm12630</b>       | 3.89   | 7.90    | 1.02      | 0.0487121 |
| <b>Hemk1</b>         | 30.84  | 50.05   | 0.70      | 0.0490085 |
| <b>Gm5805</b>        | 167.69 | 239.29  | 0.51      | 0.0490934 |
| <b>Efcab7</b>        | 6.33   | 14.09   | 1.15      | 0.0490934 |
| <b>Os9</b>           | 32.91  | 36.56   | 0.15      | 0.0493969 |
| <b>Acp1</b>          | 16.89  | 19.73   | 0.22      | 0.0494874 |



Supplementary Table 6

| Pcdh $\alpha$      |    | Total reads | Mapped reads (%) | Cis reads vs. Total (%) |
|--------------------|----|-------------|------------------|-------------------------|
| Adult cortex       | R1 | 2,952,186   | 96.04            | 47.73                   |
|                    | R2 | 3,429,152   | 95.02            | 66.26                   |
| Adult pancreas     | R1 | 3,264,095   | 89.89            | 68.43                   |
|                    | R2 | 2,074,772   | 94.25            | 61.34                   |
| Wt E17.5 cortex    | R1 | 4,278,504   | 93.00            | 70.00                   |
|                    | R2 | 2,971,200   | 94.00            | 70.21                   |
| SA1KO E17.5 cortex | R1 | 4,080,479   | 93.11            | 71.01                   |
|                    | R2 | 4,485,778   | 94.02            | 68.05                   |
| Pcdh $\gamma$      |    |             |                  |                         |
| Adult cortex       | R1 | 3,779,805   | 95.75            | 71.29                   |
|                    | R2 | 3,081,272   | 96.02            | 68.83                   |
| Adult pancreas     | R1 | 3,787,078   | 91.62            | 53.35                   |
|                    | R2 | 2,900,228   | 92.31            | 51.77                   |
| Wt E17.5 cortex    | R1 | 3,999,340   | 94.00            | 60.1                    |
|                    | R2 | 2,441,921   | 96.2             | 59.3                    |
| SA1KO E17.5 cortex | R1 | 3,456,595   | 95.00            | 59.14                   |
|                    | R2 | 3,476,737   | 96.24            | 50.15                   |

# Supplementary Table 7

P5 Illumina AATGATACGGCGACCACCGAACACTCTTTCCCTACACGACGCTCTTCCGATCT  
P7 Illumina CAAGCAGAAGACGGCATACGA

| Viewpoint       | Primer 1st cutter (5'-3')                                                           |
|-----------------|-------------------------------------------------------------------------------------|
| Pcdh alpha      | AATGATACGGCGACCACCGAACACTCTTTCCCTACACGACGCTCTTCCGATCT <b>CATTAAATTTCTATTAAAGCTT</b> |
| Pcdh gamma      | AATGATACGGCGACCACCGAACACTCTTTCCCTACACGACGCTCTTCCGATCT <b>GGTTTACTTCTGTAATAAGCTT</b> |
| REG cluster VP1 | AATGATACGGCGACCACCGAACACTCTTTCCCTACACGACGCTCTTCCGATCT <b>GGAACCACACAATGAAGCTT</b>   |
| REG cluster VP2 | AATGATACGGCGACCACCGAACACTCTTTCCCTACACGACGCTCTTCCGATCT <b>CCAGAGAAAACAGGGGGATC</b>   |
| REG cluster VP3 | AATGATACGGCGACCACCGAACACTCTTTCCCTACACGACGCTCTTCCGATCT <b>CCTGACAAACCATCTCAGATC</b>  |
|                 | Primer 2nd cutter (5'-3')                                                           |
| Pcdh alpha      | CAAGCAGAAGACGGCATACGAG <b>ATTAAAGCTGTCAAAG</b>                                      |
| Pcdh gamma      | CAAGCAGAAGACGGCATACGATA <b>CTTAGGGTGCTTCTGTT</b>                                    |
| REG cluster VP1 | CAAGCAGAAGACGGCATACGAT <b>CTATTGAGCGTTCCTATGATC</b>                                 |
| REG cluster VP2 | CAAGCAGAAGACGGCATACGAT <b>GTGTAACAACAAGAATGCGTC</b>                                 |
| REG cluster VP3 | CAAGCAGAAGACGGCATACGA <b>AGCCATCTTTCTTTGCCTC</b>                                    |

Supplementary Table 8

| <b>RT-qPCR primers</b>  | <b>sequence (5'-3')</b> |
|-------------------------|-------------------------|
| SA1 Fw                  | AGGCTTTCATGCTGCTCTGT    |
| SA1 Rev                 | TCCATGCTTTGGTTTTCTC     |
| Myc Fw                  | TCGCCTCACTCAGCTCCCCT    |
| Myc Rev                 | ACCGTCCGCTCACTCCCTCT    |
| Reg2 Fw                 | TTTTGCCAGAACATGAATGC    |
| Reg2 Rev                | GTGCCAACGACGGTACTTT     |
| Reg3a Fw                | GGTGGATGGGAGTGGAGTAA    |
| Reg3a Rev               | TAAATGCTGGATGCTGCTTG    |
| Reg3b Fw                | GGCTTCATTCTTGTCTCCA     |
| Reg3b Rev               | AGATGGGTTCCTCTCCCAGT    |
| GAPDH Fw                | TGCACCACCAACTGCTTAGC    |
| GAPDH Rev               | GAGGGGCCATCCACAGTCTTC   |
| <b>ChIP-seq primers</b> | <b>sequence (5'-3')</b> |
| Reg locus 1 Fw          | CTCAGGCACTGAGAACCACA    |
| Reg locus 1 Rev         | CACAAGGGAAATCCAGGTTG    |
| Reg locus 2 Fw          | AACTGGGCACTTGTTTGCTT    |
| Reg locus 2 Rev         | CCCTGGGAACAGTCACAGAT    |
| Reg locus 3 Fw          | GCCACACATGTTCTTTCT      |
| Reg locus 3 Rev         | AGCAGGAGACTGCCTGTGAT    |
| Pcdha4 Fw               | TTTGCAAAACGGGAAACCTA    |
| Pcdha4 Rev              | CAGCTTTCGAGAAGAGTGG     |
| Pcdha6 Fw               | CCGAGTTCATCTACCACCA     |
| Pcdha6 Rev              | GTCGGCCTTCAGTGGTAAAA    |
